# Supplementary material
Source: publisher figshare collection journal article supplement (https://frontiersin.figshare.com/ndownloader/files/17470577)
Supplement: Supplementary file 1 [file 17470577]

## Sheet: PlotDat2
Source sheet	Sheet1	0	1.03219e-06	0	0	0	0
Plot name	ProbDens1	1.4	1.37902e-07	50	0	2798.6	0
Plot Type	16	2.8	1.47017e-07	50	169
1st free col	9	4.2	1.56957e-07	0	169
Sigma Level	1	5.6	1.67795e-07	0	0
Absolute Errs	TRUE	7	1.79606e-07	ErrBox	ErrBox
Symbol Type	1	8.4	1.9247e-07	50	0
Inverse Plot	FALSE	9.8	4.11226e-07	100	0
Color Plot	TRUE	11.2	0.00010264	100	2618
3D plot	FALSE	12.6	1.72555e-05	50	2618
Linear	FALSE	14	2.57124e-07	50	0
Data Range	A2:B5821	15.4	2.75634e-07	ErrBox	ErrBox
Filled Symbols	FALSE	16.8	2.9668e-07	100	0
ConcAge	FALSE	18.2	3.1942e-07	150	0
ConcSwap	FALSE	19.6	3.43952e-07	150	331
1st Symbol-row	1	21	3.70371e-07	100	331
		22.4	3.98772e-07	100	0
		23.8	4.29245e-07	ErrBox	ErrBox
		25.2	4.61878e-07	150	0
		26.6	4.96753e-07	200	0
		28	5.33946e-07	200	2495
		29.4	5.73525e-07	150	2495
		30.8	6.15549e-07	150	0
		32.2	6.60554e-07	ErrBox	ErrBox
		33.6	7.38283e-07	200	0
		35	2.02551e-06	250	0
		36.4	4.37169e-05	250	42
		37.8	0.000137573	200	42
		39.2	0.000163774	200	0
		40.6	0.000517099	ErrBox	ErrBox
		42	0.00160784	250	0
		43.4	0.00356098	300	0
		44.8	0.00554534	300	18
		46.2	0.00440187	250	18
		47.6	0.00199906	250	0
		49	0.000641259	ErrBox	ErrBox
		50.4	0.000239452	300	0
		51.8	0.000281867	350	0
		53.2	0.000512866	350	47
		54.6	0.0011554	300	47
		56	0.00305967	300	0
		57.4	0.00639276	ErrBox	ErrBox
		58.8	0.00896929	350	0
		60.2	0.00857204	400	0
		61.6	0.0065607	400	67
		63	0.00482237	350	67
		64.4	0.0038401	350	0
		65.8	0.00417613	ErrBox	ErrBox
		67.2	0.007237	400	0
		68.6	0.0144478	450	0
		70	0.025709	450	2
		71.4	0.0376753	400	2
		72.8	0.044372	400	0
		74.2	0.0421138	ErrBox	ErrBox
		75.6	0.0328171	550	0
		77	0.0222732	600	0
		78.4	0.0145077	600	1
		79.8	0.00944933	550	1
		81.2	0.00607466	550	0
		82.6	0.00380584	ErrBox	ErrBox
		84	0.00232591	700	0
		85.4	0.00144014	750	0
		86.8	0.000964995	750	1
		88.2	0.000771428	700	1
		89.6	0.000734028	700	0
		91	0.000758351	ErrBox	ErrBox
		92.4	0.000840515	800	0
		93.8	0.00098301	850	0
		95.2	0.00111976	850	1
		96.6	0.00116077	800	1
		98	0.00106891	800	0
		99.4	0.000892245	ErrBox	ErrBox
		100.8	0.000709833	950	0
		102.2	0.000565188	1000	0
		103.6	0.000460758	1000	1
		105	0.000383283	950	1
		106.4	0.000319159	950	0
		107.8	0.000257964	ErrBox	ErrBox
		109.2	0.000199686	1000	0
		110.6	0.000156119	1050	0
		112	0.000138116	1050	2
		113.4	0.000143173	1000	2
		114.8	0.000156662	1000	0
		116.2	0.000163896	ErrBox	ErrBox
		117.6	0.000160799	1050	0
		119	0.000152358	1100	0
		120.4	0.000143115	1100	2
		121.8	0.000134587	1050	2
		123.2	0.000128799	1050	0
		124.6	0.000127663	ErrBox	ErrBox
		126	0.00013229	1100	0
		127.4	0.000145803	1150	0
		128.8	0.000173848	1150	1
		130.2	0.000223211	1100	1
		131.6	0.000303048	1100	0
		133	0.000425034	ErrBox	ErrBox
		134.4	0.000596511	1250	0
		135.8	0.000814137	1300	0
		137.2	0.0010713	1300	1
		138.6	0.00137455	1250	1
		140	0.0017553	1250	0
		141.4	0.00227207	ErrBox	ErrBox
		142.8	0.00299796	1300	0
		144.2	0.00398957	1350	0
		145.6	0.00524912	1350	1
		147	0.00669995	1300	1
		148.4	0.00819227	1300	0
		149.8	0.00954717	ErrBox	ErrBox
		151.2	0.0106249	1450	0
		152.6	0.0113776	1500	0
		154	0.0118458	1500	1
		155.4	0.0121067	1450	1
		156.8	0.0122217	1450	0
		158.2	0.0122231	ErrBox	ErrBox
		159.6	0.012129	1500	0
		161	0.0119665	1550	0
		162.4	0.011789	1550	2
		163.8	0.0116698	1500	2
		165.2	0.0116641	1500	0
		166.6	0.0117692	ErrBox	ErrBox
		168	0.0119173	1550	0
		169.4	0.0120032	1600	0
		170.8	0.0119172	1600	1
		172.2	0.0115739	1550	1
		173.6	0.0109408	1550	0
		175	0.0100577	ErrBox	ErrBox
		176.4	0.00902443	1650	0
		177.8	0.00796679	1700	0
		179.2	0.00700341	1700	1
		180.6	0.00622319	1650	1
		182	0.00566971	1650	0
		183.4	0.00533378	ErrBox	ErrBox
		184.8	0.00516018	1700	0
		186.2	0.0050679	1750	0
		187.6	0.00497564	1750	2
		189	0.00482258	1700	2
		190.4	0.00457809	1700	0
		191.8	0.00424023	ErrBox	ErrBox
		193.2	0.00382711	1750	0
		194.6	0.00336694	1800	0
		196	0.0028905	1800	4
		197.4	0.00242611	1750	4
		198.8	0.00199604	1750	0
		200.2	0.00161426	ErrBox	ErrBox
		201.6	0.00128639	1850	0
		203	0.00101179	1900	0
		204.4	0.000786438	1900	1
		205.8	0.000605123	1850	1
		207.2	0.000462557	1850	0
		208.6	0.000353579	ErrBox	ErrBox
		210	0.000273044	1950	0
		211.4	0.000215726	2000	0
		212.8	0.000176355	2000	1
		214.2	0.00014981	1950	1
		215.6	0.000131431	1950	0
		217	0.000117407	ErrBox	ErrBox
		218.4	0.000105118	2050	0
		219.8	9.3258e-05	2100	0
		221.2	8.16406e-05	2100	2
		222.6	7.0761e-05	2050	2
		224	6.12939e-05	2050	0
		225.4	5.371e-05	ErrBox	ErrBox
		226.8	4.81086e-05	2600	0
		228.2	4.42485e-05	2650	0
		229.6	4.1674e-05	2650	1
		231	3.98697e-05	2600	1
		232.4	3.83896e-05	2600	0
		233.8	3.69302e-05	ErrBox	ErrBox
		235.2	3.53655e-05	2650	0
		236.6	3.37453e-05	2700	0
		238	3.22667e-05	2700	3
		239.4	3.1227e-05	2650	3
		240.8	3.09559e-05	2650	0
		242.2	3.17271e-05	ErrBox	ErrBox
		243.6	3.36631e-05	2700	0
		245	3.66563e-05	2750	0
		246.4	4.03466e-05	2750	1
		247.8	4.41703e-05	2700	1
		249.2	4.74856e-05	2700	0
		250.6	4.97296e-05	ErrBox	ErrBox
		252	5.05538e-05
		253.4	4.9892e-05
		254.8	4.79503e-05
		256.2	4.51389e-05
		257.6	4.19798e-05
		259	3.90142e-05
		260.4	3.67169e-05
		261.8	3.54242e-05
		263.2	3.52831e-05
		264.6	3.62501e-05
		266	3.81424e-05
		267.4	4.07362e-05
		268.8	4.38617e-05
		270.2	4.74468e-05
		271.6	5.14785e-05
		273	5.5909e-05
		274.4	6.05583e-05
		275.8	6.50838e-05
		277.2	6.90446e-05
		278.6	7.20364e-05
		280	7.38333e-05
		281.4	7.44694e-05
		282.8	7.42187e-05
		284.2	7.34957e-05
		285.6	7.27096e-05
		287	7.21382e-05
		288.4	7.18583e-05
		289.8	7.17497e-05
		291.2	7.15618e-05
		292.6	7.10172e-05
		294	6.99173e-05
		295.4	6.82194e-05
		296.8	6.60711e-05
		298.2	6.37931e-05
		299.6	6.18196e-05
		301	6.06163e-05
		302.4	6.05914e-05
		303.8	6.20193e-05
		305.2	6.4994e-05
		306.6	6.94131e-05
		308	7.50008e-05
		309.4	8.13537e-05
		310.8	8.80057e-05
		312.2	9.45025e-05
		313.6	0.000100469
		315	0.000105666
		316.4	0.000110027
		317.8	0.000113661
		319.2	0.000116834
		320.6	0.00011993
		322	0.000123388
		323.4	0.000127658
		324.8	0.000133152
		326.2	0.000140225
		327.6	0.00014915
		329	0.000160097
		330.4	0.000173105
		331.8	0.000188042
		333.2	0.000204579
		334.6	0.000222184
		336	0.00024016
		337.4	0.000257715
		338.8	0.000274071
		340.2	0.000288574
		341.6	0.000300792
		343	0.000310574
		344.4	0.000318058
		345.8	0.000323632
		347.2	0.000327862
		348.6	0.000331387
		350	0.000334817
		351.4	0.00033864
		352.8	0.000343161
		354.2	0.000348461
		355.6	0.000354408
		357	0.000360686
		358.4	0.000366846
		359.8	0.000372359
		361.2	0.000376664
		362.6	0.000379187
		364	0.000379357
		365.4	0.000376616
		366.8	0.000370455
		368.2	0.000360467
		369.6	0.000346436
		371	0.00032841
		372.4	0.000306758
		373.8	0.000282166
		375.2	0.000255576
		376.6	0.000228072
		378	0.000200745
		379.4	0.000174561
		380.8	0.000150271
		382.2	0.00012836
		383.6	0.000109055
		385	9.23673e-05
		386.4	7.81464e-05
		387.8	6.61507e-05
		389.2	5.61003e-05
		390.6	4.77142e-05
		392	4.0736e-05
		393.4	3.49426e-05
		394.8	3.01455e-05
		396.2	2.61866e-05
		397.6	2.2934e-05
		399	2.02765e-05
		400.4	1.81201e-05
		401.8	1.63826e-05
		403.2	1.49931e-05
		404.6	1.38926e-05
		406	1.30283e-05
		407.4	1.23561e-05
		408.8	1.18374e-05
		410.2	1.1441e-05
		411.6	1.11415e-05
		413	1.09165e-05
		414.4	1.075e-05
		415.8	1.06297e-05
		417.2	1.05469e-05
		418.6	1.04973e-05
		420	1.04779e-05
		421.4	1.04868e-05
		422.8	1.05229e-05
		424.2	1.05827e-05
		425.6	1.06603e-05
		427	1.07461e-05
		428.4	1.08266e-05
		429.8	1.08844e-05
		431.2	1.08991e-05
		432.6	1.08495e-05
		434	1.07159e-05
		435.4	1.04817e-05
		436.8	1.01361e-05
		438.2	9.67579e-06
		439.6	9.10547e-06
		441	8.43789e-06
		442.4	7.69276e-06
		443.8	6.89496e-06
		445.2	6.07214e-06
		446.6	5.25223e-06
		448	4.46107e-06
		449.4	3.72049e-06
		450.8	3.04705e-06
		452.2	2.45127e-06
		453.6	1.93839e-06
		455	1.50794e-06
		456.4	1.15553e-06
		457.8	8.73837e-07
		459.2	6.53774e-07
		460.6	4.8556e-07
		462	3.59574e-07
		463.4	2.66955e-07
		464.8	1.99807e-07
		466.2	1.52056e-07
		467.6	1.18306e-07
		469	9.45611e-08
		470.4	7.78287e-08
		471.8	6.5934e-08
		473.2	5.73386e-08
		474.6	5.08745e-08
		476	4.60791e-08
		477.4	4.23038e-08
		478.8	3.92406e-08
		480.2	3.66867e-08
		481.6	3.4381e-08
		483	3.25505e-08
		484.4	3.09105e-08
		485.8	2.94316e-08
		487.2	2.80889e-08
		488.6	2.68617e-08
		490	2.57324e-08
		491.4	2.46865e-08
		492.8	2.37118e-08
		494.2	2.27985e-08
		495.6	2.19381e-08
		497	2.11239e-08
		498.4	2.03503e-08
		499.8	1.94408e-08
		501.2	1.87766e-08
		502.6	1.8132e-08
		504	1.75066e-08
		505.4	1.68997e-08
		506.8	1.63112e-08
		508.2	1.57404e-08
		509.6	1.54247e-08
		511	1.50479e-08
		512.4	1.47862e-08
		513.8	1.4694e-08
		515.2	1.48526e-08
		516.6	1.53818e-08
		518	1.6454e-08
		519.4	1.83141e-08
		520.8	2.13031e-08
		522.2	2.5887e-08
		523.6	3.26915e-08
		525	4.254e-08
		526.4	5.64949e-08
		527.8	7.58984e-08
		529.2	1.02409e-07
		530.6	1.3803e-07
		532	1.85119e-07
		533.4	2.46376e-07
		534.8	3.24801e-07
		536.2	4.23611e-07
		537.6	5.46113e-07
		539	6.95527e-07
		540.4	8.74772e-07
		541.8	1.0862e-06
		543.2	1.3313e-06
		544.6	1.61044e-06
		546	1.92252e-06
		547.4	2.26481e-06
		548.8	2.63272e-06
		550.2	3.0198e-06
		551.6	3.41776e-06
		553	3.81669e-06
		554.4	4.20541e-06
		555.8	4.57197e-06
		557.2	4.90419e-06
		558.6	5.19038e-06
		560	5.41997e-06
		561.4	5.58417e-06
		562.8	5.67655e-06
		564.2	5.69342e-06
		565.6	5.6341e-06
		567	5.50095e-06
		568.4	5.29923e-06
		569.8	5.03674e-06
		571.2	4.72333e-06
		572.6	4.37028e-06
		574	3.98963e-06
		575.4	3.59351e-06
		576.8	3.19351e-06
		578.2	2.80016e-06
		579.6	2.4225e-06
		581	2.06782e-06
		582.4	1.74153e-06
		583.8	1.44718e-06
		585.2	1.18657e-06
		586.6	9.59942e-07
		588	7.66282e-07
		589.4	6.03578e-07
		590.8	4.69131e-07
		592.2	3.59825e-07
		593.6	2.72367e-07
		595	2.0348e-07
		596.4	1.50057e-07
		597.8	1.09254e-07
		599.2	7.85572e-08
		600.6	5.58065e-08
		602	3.91917e-08
		603.4	2.72333e-08
		604.8	1.87491e-08
		606.2	1.28138e-08
		607.6	8.71834e-09
		609	5.92954e-09
		610.4	4.05422e-09
		611.8	2.80761e-09
		613.2	1.98713e-09
		614.6	1.45122e-09
		616	1.10256e-09
		617.4	8.75428e-10
		618.8	7.26133e-10
		620.2	5.2205e-10
		621.6	4.9682e-10
		623	4.72728e-10
		624.4	4.49727e-10
		625.8	4.27772e-10
		627.2	4.06819e-10
		628.6	3.86825e-10
		630	3.67751e-10
		631.4	3.49558e-10
		632.8	3.32207e-10
		634.2	3.15664e-10
		635.6	5.11205e-10
		637	5.58366e-10
		638.4	6.23288e-10
		639.8	7.10242e-10
		641.2	8.24475e-10
		642.6	9.72408e-10
		644	1.16186e-09
		645.4	1.40231e-09
		646.8	1.70518e-09
		648.2	2.08421e-09
		649.6	2.55579e-09
		651	2.97069e-09
		652.4	3.69824e-09
		653.8	4.58769e-09
		655.2	5.67098e-09
		656.6	6.98529e-09
		658	8.57381e-09
		659.4	1.04864e-08
		660.8	1.27803e-08
		662.2	1.55211e-08
		663.6	1.8783e-08
		665	2.26501e-08
		666.4	2.72169e-08
		667.8	3.2589e-08
		669.2	3.88836e-08
		670.6	4.62301e-08
		672	5.47705e-08
		673.4	6.46594e-08
		674.8	7.60641e-08
		676.2	8.91643e-08
		677.6	1.04152e-07
		679	1.21228e-07
		680.4	1.40606e-07
		681.8	1.62506e-07
		683.2	1.87153e-07
		684.6	2.14777e-07
		686	2.45607e-07
		687.4	2.79871e-07
		688.8	3.17789e-07
		690.2	3.59569e-07
		691.6	4.05404e-07
		693	4.55468e-07
		694.4	5.09908e-07
		695.8	5.68837e-07
		697.2	6.32335e-07
		698.6	7.00439e-07
		700	7.73136e-07
		701.4	8.50365e-07
		702.8	9.32004e-07
		704.2	1.01787e-06
		705.6	1.10773e-06
		707	1.20125e-06
		708.4	1.29807e-06
		709.8	1.39795e-06
		711.2	1.50003e-06
		712.6	1.60388e-06
		714	1.7089e-06
		715.4	1.81437e-06
		716.8	1.91959e-06
		718.2	2.02377e-06
		719.6	2.12613e-06
		721	2.22584e-06
		722.4	2.32208e-06
		723.8	2.41403e-06
		725.2	2.50091e-06
		726.6	2.58193e-06
		728	2.65639e-06
		729.4	2.72363e-06
		730.8	2.78305e-06
		732.2	2.83415e-06
		733.6	2.87654e-06
		735	2.9099e-06
		736.4	2.93407e-06
		737.8	2.94896e-06
		739.2	2.95465e-06
		740.6	2.95133e-06
		742	2.93933e-06
		743.4	2.9191e-06
		744.8	2.89121e-06
		746.2	2.85637e-06
		747.6	2.81539e-06
		749	2.76917e-06
		750.4	2.71872e-06
		751.8	2.66511e-06
		753.2	2.60948e-06
		754.6	2.55299e-06
		756	2.49684e-06
		757.4	2.44225e-06
		758.8	2.39038e-06
		760.2	2.34239e-06
		761.6	2.29937e-06
		763	2.26232e-06
		764.4	2.23218e-06
		765.8	2.20972e-06
		767.2	2.19563e-06
		768.6	2.19042e-06
		770	2.19445e-06
		771.4	2.20791e-06
		772.8	2.23082e-06
		774.2	2.26299e-06
		775.6	2.30407e-06
		777	2.35351e-06
		778.4	2.4106e-06
		779.8	2.47446e-06
		781.2	2.54404e-06
		782.6	2.61816e-06
		784	2.69551e-06
		785.4	2.77472e-06
		786.8	2.8543e-06
		788.2	2.93275e-06
		789.6	3.00854e-06
		791	3.08015e-06
		792.4	3.14611e-06
		793.8	3.20502e-06
		795.2	3.25557e-06
		796.6	3.29659e-06
		798	3.32705e-06
		799.4	3.34607e-06
		800.8	3.35299e-06
		802.2	3.34731e-06
		803.6	3.32875e-06
		805	3.29723e-06
		806.4	3.25288e-06
		807.8	3.19602e-06
		809.2	3.12716e-06
		810.6	3.04698e-06
		812	2.95633e-06
		813.4	2.85616e-06
		814.8	2.74758e-06
		816.2	2.63175e-06
		817.6	2.50989e-06
		819	2.38329e-06
		820.4	2.25321e-06
		821.8	2.12093e-06
		823.2	1.98767e-06
		824.6	1.85461e-06
		826	1.72286e-06
		827.4	1.59342e-06
		828.8	1.46722e-06
		830.2	1.34505e-06
		831.6	1.22761e-06
		833	1.11548e-06
		834.4	1.00911e-06
		835.8	9.08842e-07
		837.2	8.14917e-07
		838.6	7.27465e-07
		840	6.46522e-07
		841.4	5.7204e-07
		842.8	5.03742e-07
		844.2	4.41785e-07
		845.6	3.8573e-07
		847	3.35292e-07
		848.4	2.90157e-07
		849.8	2.49983e-07
		851.2	2.14416e-07
		852.6	1.83094e-07
		854	1.55653e-07
		855.4	1.31738e-07
		856.8	1.11002e-07
		858.2	9.31156e-08
		859.6	7.77646e-08
		861	6.46561e-08
		862.4	5.35188e-08
		863.8	4.41033e-08
		865.2	3.61831e-08
		866.6	2.95535e-08
		868	2.40314e-08
		869.4	1.94545e-08
		870.8	1.56794e-08
		872.2	1.25808e-08
		873.6	1.00497e-08
		875	7.99224e-09
		876.4	6.32779e-09
		877.8	4.98775e-09
		879.2	3.91405e-09
		880.6	3.05785e-09
		882	2.37835e-09
		883.4	1.84163e-09
		884.8	1.41971e-09
		886.2	1.08959e-09
		887.6	8.32525e-10
		889	6.33286e-10
		890.4	4.79591e-10
		891.8	5.60546e-10
		893.2	5.37581e-10
		894.6	5.57335e-10
		896	4.70105e-10
		897.4	6.20615e-10
		898.8	8.15691e-10
		900.2	1.06735e-09
		901.6	1.39047e-09
		903	1.8034e-09
		904.4	2.32863e-09
		905.8	2.99353e-09
		907.2	3.83128e-09
		908.6	4.88179e-09
		910	6.19286e-09
		911.4	7.8213e-09
		912.8	9.83427e-09
		914.2	1.23107e-08
		915.6	1.53426e-08
		917	1.90366e-08
		918.4	2.35156e-08
		919.8	2.89201e-08
		921.2	3.54095e-08
		922.6	4.31634e-08
		924	5.23826e-08
		925.4	6.329e-08
		926.8	7.61304e-08
		928.2	9.11713e-08
		929.6	1.08701e-07
		931	1.29028e-07
		932.4	1.5248e-07
		933.8	1.79397e-07
		935.2	2.10134e-07
		936.6	2.45048e-07
		938	2.845e-07
		939.4	3.28844e-07
		940.8	3.7842e-07
		942.2	4.33544e-07
		943.6	4.94884e-07
		945	5.62045e-07
		946.4	6.35514e-07
		947.8	7.15428e-07
		949.2	8.01855e-07
		950.6	8.94784e-07
		952	9.94112e-07
		953.4	1.09964e-06
		954.8	1.21106e-06
		956.2	1.32798e-06
		957.6	1.44986e-06
		959	1.57608e-06
		960.4	1.70592e-06
		961.8	1.83853e-06
		963.2	1.97301e-06
		964.6	2.10836e-06
		966	2.24352e-06
		967.4	2.37741e-06
		968.8	2.50891e-06
		970.2	2.63691e-06
		971.6	2.76052e-06
		973	2.87842e-06
		974.4	2.98983e-06
		975.8	3.09391e-06
		977.2	3.18999e-06
		978.6	3.27754e-06
		980	3.35624e-06
		981.4	3.42593e-06
		982.8	3.48672e-06
		984.2	3.53888e-06
		985.6	3.58296e-06
		987	3.6197e-06
		988.4	3.6501e-06
		989.8	3.67532e-06
		991.2	3.69699e-06
		992.6	3.71625e-06
		994	3.73498e-06
		995.4	3.75497e-06
		996.8	3.7781e-06
		998.2	3.80631e-06
		999.6	3.8415e-06
		1001	3.88558e-06
		1002.4	3.94035e-06
		1003.8	4.00751e-06
		1005.2	4.08861e-06
		1006.6	4.18501e-06
		1008	4.29786e-06
		1009.4	4.42805e-06
		1010.8	4.57622e-06
		1012.2	4.7427e-06
		1013.6	4.92752e-06
		1015	5.1304e-06
		1016.4	5.3507e-06
		1017.8	5.58749e-06
		1019.2	5.83948e-06
		1020.6	6.10508e-06
		1022	6.38238e-06
		1023.4	6.66916e-06
		1024.8	6.96296e-06
		1026.2	7.26126e-06
		1027.6	7.5608e-06
		1029	7.85865e-06
		1030.4	8.1516e-06
		1031.8	8.43636e-06
		1033.2	8.70962e-06
		1034.6	8.96814e-06
		1036	9.20876e-06
		1037.4	9.42848e-06
		1038.8	9.62454e-06
		1040.2	9.79447e-06
		1041.6	9.93616e-06
		1043	1.00479e-05
		1044.4	1.01283e-05
		1045.8	1.01767e-05
		1047.2	1.01928e-05
		1048.6	1.01767e-05
		1050	1.01292e-05
		1051.4	1.00514e-05
		1052.8	9.94511e-06
		1054.2	9.81235e-06
		1055.6	9.65558e-06
		1057	9.47756e-06
		1058.4	9.28129e-06
		1059.8	9.06988e-06
		1061.2	8.84657e-06
		1062.6	8.61457e-06
		1064	8.37701e-06
		1065.4	8.13689e-06
		1066.8	7.897e-06
		1068.2	7.65989e-06
		1069.6	7.42781e-06
		1071	7.20268e-06
		1072.4	6.98611e-06
		1073.8	6.77937e-06
		1075.2	6.58339e-06
		1076.6	6.39881e-06
		1078	6.22581e-06
		1079.4	6.06485e-06
		1080.8	5.91558e-06
		1082.2	5.77771e-06
		1083.6	5.65077e-06
		1085	5.5342e-06
		1086.4	5.42736e-06
		1087.8	5.32955e-06
		1089.2	5.24005e-06
		1090.6	5.15814e-06
		1092	5.08309e-06
		1093.4	5.01419e-06
		1094.8	4.95073e-06
		1096.2	4.89205e-06
		1097.6	4.83746e-06
		1099	4.78631e-06
		1100.4	4.73795e-06
		1101.8	4.6917e-06
		1103.2	4.64691e-06
		1104.6	4.60287e-06
		1106	4.55891e-06
		1107.4	4.51432e-06
		1108.8	4.46837e-06
		1110.2	4.42036e-06
		1111.6	4.36958e-06
		1113	4.31534e-06
		1114.4	4.25701e-06
		1115.8	4.19396e-06
		1117.2	4.12568e-06
		1118.6	4.05168e-06
		1120	3.9716e-06
		1121.4	3.88517e-06
		1122.8	3.79205e-06
		1124.2	3.69259e-06
		1125.6	3.58664e-06
		1127	3.4744e-06
		1128.4	3.3562e-06
		1129.8	3.23235e-06
		1131.2	3.10369e-06
		1132.6	2.97068e-06
		1134	2.83405e-06
		1135.4	2.69458e-06
		1136.8	2.5531e-06
		1138.2	2.41049e-06
		1139.6	2.26763e-06
		1141	2.12539e-06
		1142.4	1.98464e-06
		1143.8	1.84618e-06
		1145.2	1.71078e-06
		1146.6	1.57916e-06
		1148	1.45195e-06
		1149.4	1.32971e-06
		1150.8	1.21289e-06
		1152.2	1.10174e-06
		1153.6	9.96888e-07
		1155	8.98344e-07
		1156.4	8.0623e-07
		1157.8	7.20588e-07
		1159.2	6.41386e-07
		1160.6	5.68527e-07
		1162	5.01852e-07
		1163.4	4.41151e-07
		1164.8	3.86174e-07
		1166.2	3.36634e-07
		1167.6	2.9222e-07
		1169	2.526e-07
		1170.4	2.17434e-07
		1171.8	1.86375e-07
		1173.2	1.59079e-07
		1174.6	1.35208e-07
		1176	1.14433e-07
		1177.4	9.6441e-08
		1178.8	8.08056e-08
		1180.2	6.75375e-08
		1181.6	5.62076e-08
		1183	4.65793e-08
		1184.4	3.84359e-08
		1185.8	3.15812e-08
		1187.2	2.58385e-08
		1188.6	2.105e-08
		1190	1.70759e-08
		1191.4	1.39993e-08
		1192.8	1.13688e-08
		1194.2	9.24976e-09
		1195.6	7.56757e-09
		1197	6.26067e-09
		1198.4	5.2796e-09
		1199.8	4.58627e-09
		1201.2	4.15323e-09
		1202.6	3.96324e-09
		1204	4.00895e-09
		1205.4	4.29277e-09
		1206.8	4.82696e-09
		1208.2	5.63388e-09
		1209.6	6.74644e-09
		1211	8.2087e-09
		1212.4	1.00767e-08
		1213.8	1.24193e-08
		1215.2	1.53193e-08
		1216.6	1.87322e-08
		1218	2.30933e-08
		1219.4	2.83464e-08
		1220.8	3.46439e-08
		1222.2	4.21569e-08
		1223.6	5.10771e-08
		1225	6.16167e-08
		1226.4	7.40091e-08
		1227.8	8.8509e-08
		1229.2	1.05391e-07
		1230.6	1.2495e-07
		1232	1.47497e-07
		1233.4	1.73358e-07
		1234.8	2.02871e-07
		1236.2	2.36381e-07
		1237.6	2.74232e-07
		1239	3.16766e-07
		1240.4	3.64313e-07
		1241.8	4.17182e-07
		1243.2	4.75654e-07
		1244.6	5.39973e-07
		1246	6.10334e-07
		1247.4	6.86875e-07
		1248.8	7.69668e-07
		1250.2	8.58704e-07
		1251.6	9.5389e-07
		1253	1.05504e-06
		1254.4	1.16186e-06
		1255.8	1.27395e-06
		1257.2	1.39081e-06
		1258.6	1.51181e-06
		1260	1.63622e-06
		1261.4	1.7632e-06
		1262.8	1.89199e-06
		1264.2	2.02129e-06
		1265.6	2.15012e-06
		1267	2.27731e-06
		1268.4	2.40168e-06
		1269.8	2.52202e-06
		1271.2	2.63711e-06
		1272.6	2.7458e-06
		1274	2.84701e-06
		1275.4	2.93972e-06
		1276.8	3.02311e-06
		1278.2	3.09647e-06
		1279.6	3.15935e-06
		1281	3.2115e-06
		1282.4	3.25297e-06
		1283.8	3.28409e-06
		1285.2	3.30554e-06
		1286.6	3.31833e-06
		1288	3.3238e-06
		1289.4	3.32368e-06
		1290.8	3.31998e-06
		1292.2	3.31504e-06
		1293.6	3.31144e-06
		1295	3.31192e-06
		1296.4	3.31932e-06
		1297.8	3.33646e-06
		1299.2	3.36602e-06
		1300.6	3.4104e-06
		1302	3.47158e-06
		1303.4	3.55098e-06
		1304.8	3.64932e-06
		1306.2	3.76651e-06
		1307.6	3.90154e-06
		1309	4.05245e-06
		1310.4	4.21629e-06
		1311.8	4.38918e-06
		1313.2	4.56637e-06
		1314.6	4.74243e-06
		1316	4.91138e-06
		1317.4	5.06699e-06
		1318.8	5.20299e-06
		1320.2	5.31339e-06
		1321.6	5.39271e-06
		1323	5.43632e-06
		1324.4	5.44061e-06
		1325.8	5.40317e-06
		1327.2	5.32298e-06
		1328.6	5.20036e-06
		1330	5.03704e-06
		1331.4	4.83605e-06
		1332.8	4.60153e-06
		1334.2	4.33855e-06
		1335.6	4.05291e-06
		1337	3.7508e-06
		1338.4	3.43857e-06
		1339.8	3.12247e-06
		1341.2	2.80839e-06
		1342.6	2.5017e-06
		1344	2.20706e-06
		1345.4	1.92831e-06
		1346.8	1.66845e-06
		1348.2	1.42958e-06
		1349.6	1.213e-06
		1351	1.01919e-06
		1352.4	8.47993e-07
		1353.8	6.98658e-07
		1355.2	5.69993e-07
		1356.6	4.60474e-07
		1358	3.68358e-07
		1359.4	2.91786e-07
		1360.8	2.2887e-07
		1362.2	1.77764e-07
		1363.6	1.3672e-07
		1365	1.04126e-07
		1366.4	7.8529e-08
		1367.8	5.86473e-08
		1369.2	4.33734e-08
		1370.6	3.17661e-08
		1372	2.304e-08
		1373.4	1.65498e-08
		1374.8	1.17736e-08
		1376.2	8.29571e-09
		1377.6	5.7896e-09
		1379	4.00241e-09
		1380.4	2.6106e-09
		1381.8	1.76298e-09
		1383.2	1.17876e-09
		1384.6	7.80328e-10
		1386	5.11447e-10
		1387.4	3.31891e-10
		1388.8	2.13237e-10
		1390.2	0
		1391.6	0
		1393	0
		1394.4	2.05429e-10
		1395.8	2.83805e-10
		1397.2	3.89958e-10
		1398.6	5.32915e-10
		1400	7.24333e-10
		1401.4	9.79173e-10
		1402.8	1.3165e-09
		1404.2	1.76045e-09
		1405.6	2.34136e-09
		1407	3.09709e-09
		1408.4	4.07454e-09
		1409.8	5.33145e-09
		1411.2	6.93829e-09
		1412.6	8.98051e-09
		1414	1.15609e-08
		1415.4	1.4802e-08
		1416.8	1.88491e-08
		1418.2	2.38728e-08
		1419.6	3.00715e-08
		1421	3.76746e-08
		1422.4	4.69443e-08
		1423.8	5.81779e-08
		1425.2	7.17091e-08
		1426.6	8.79085e-08
		1428	1.07184e-07
		1429.4	1.30152e-07
		1430.8	1.57016e-07
		1432.2	1.88406e-07
		1433.6	2.2486e-07
		1435	2.66931e-07
		1436.4	3.1518e-07
		1437.8	3.70166e-07
		1439.2	4.32435e-07
		1440.6	5.02501e-07
		1442	5.80837e-07
		1443.4	6.67854e-07
		1444.8	7.63889e-07
		1446.2	8.69186e-07
		1447.6	9.83882e-07
		1449	1.10799e-06
		1450.4	1.24141e-06
		1451.8	1.38386e-06
		1453.2	1.53497e-06
		1454.6	1.69417e-06
		1456	1.8608e-06
		1457.4	2.03401e-06
		1458.8	2.21289e-06
		1460.2	2.39638e-06
		1461.6	2.58338e-06
		1463	2.77289e-06
		1464.4	2.96345e-06
		1465.8	3.1542e-06
		1467.2	3.34363e-06
		1468.6	3.53084e-06
		1470	3.71484e-06
		1471.4	3.89477e-06
		1472.8	4.06989e-06
		1474.2	4.23964e-06
		1475.6	4.4036e-06
		1477	4.56153e-06
		1478.4	4.71336e-06
		1479.8	4.85919e-06
		1481.2	4.99928e-06
		1482.6	5.13404e-06
		1484	5.26402e-06
		1485.4	5.38992e-06
		1486.8	5.51255e-06
		1488.2	5.63282e-06
		1489.6	5.75175e-06
		1491	5.87043e-06
		1492.4	5.98998e-06
		1493.8	6.11155e-06
		1495.2	6.23627e-06
		1496.6	6.36519e-06
		1498	6.4992e-06
		1499.4	6.63898e-06
		1500.8	6.7849e-06
		1502.2	6.93695e-06
		1503.6	7.09462e-06
		1505	7.25684e-06
		1506.4	7.42191e-06
		1507.8	7.58749e-06
		1509.2	7.75054e-06
		1510.6	7.90741e-06
		1512	8.05389e-06
		1513.4	8.18537e-06
		1514.8	8.297e-06
		1516.2	8.38387e-06
		1517.6	8.44132e-06
		1519	8.46514e-06
		1520.4	8.45184e-06
		1521.8	8.39888e-06
		1523.2	8.30485e-06
		1524.6	8.16962e-06
		1526	7.99441e-06
		1527.4	7.78178e-06
		1528.8	7.53555e-06
		1530.2	7.26067e-06
		1531.6	6.96299e-06
		1533	6.649e-06
		1534.4	6.32555e-06
		1535.8	5.99953e-06
		1537.2	5.6776e-06
		1538.6	5.36589e-06
		1540	5.06978e-06
		1541.4	4.79373e-06
		1542.8	4.54116e-06
		1544.2	4.31436e-06
		1545.6	4.11453e-06
		1547	3.94182e-06
		1548.4	3.79544e-06
		1549.8	3.67375e-06
		1551.2	3.57448e-06
		1552.6	3.49485e-06
		1554	3.43175e-06
		1555.4	3.38191e-06
		1556.8	3.34202e-06
		1558.2	3.30888e-06
		1559.6	3.27949e-06
		1561	3.25113e-06
		1562.4	3.2214e-06
		1563.8	3.18814e-06
		1565.2	3.15002e-06
		1566.6	3.10558e-06
		1568	3.05392e-06
		1569.4	2.99449e-06
		1570.8	2.92703e-06
		1572.2	2.85158e-06
		1573.6	2.7684e-06
		1575	2.67796e-06
		1576.4	2.5809e-06
		1577.8	2.47799e-06
		1579.2	2.3701e-06
		1580.6	2.25816e-06
		1582	2.14314e-06
		1583.4	2.02587e-06
		1584.8	1.90768e-06
		1586.2	1.78931e-06
		1587.6	1.67171e-06
		1589	1.55571e-06
		1590.4	1.44205e-06
		1591.8	1.33143e-06
		1593.2	1.22447e-06
		1594.6	1.1217e-06
		1596	1.02356e-06
		1597.4	9.30405e-07
		1598.8	8.42514e-07
		1600.2	7.60076e-07
		1601.6	6.83211e-07
		1603	6.11971e-07
		1604.4	5.4635e-07
		1605.8	4.8629e-07
		1607.2	4.31692e-07
		1608.6	3.82425e-07
		1610	3.38331e-07
		1611.4	2.99238e-07
		1612.8	2.64964e-07
		1614.2	2.35331e-07
		1615.6	2.10164e-07
		1617	1.89304e-07
		1618.4	1.72611e-07
		1619.8	1.5997e-07
		1621.2	1.51293e-07
		1622.6	1.46524e-07
		1624	1.4583e-07
		1625.4	1.48923e-07
		1626.8	1.55992e-07
		1628.2	1.6713e-07
		1629.6	1.82464e-07
		1631	2.02158e-07
		1632.4	2.26405e-07
		1633.8	2.55424e-07
		1635.2	2.89461e-07
		1636.6	3.28775e-07
		1638	3.73641e-07
		1639.4	4.24337e-07
		1640.8	4.81143e-07
		1642.2	5.44329e-07
		1643.6	6.14151e-07
		1645	6.90844e-07
		1646.4	7.74612e-07
		1647.8	8.65628e-07
		1649.2	9.6402e-07
		1650.6	1.06987e-06
		1652	1.18322e-06
		1653.4	1.30404e-06
		1654.8	1.43225e-06
		1656.2	1.56796e-06
		1657.6	1.71063e-06
		1659	1.86018e-06
		1660.4	2.01631e-06
		1661.8	2.17856e-06
		1663.2	2.34688e-06
		1664.6	2.52069e-06
		1666	2.69956e-06
		1667.4	2.88303e-06
		1668.8	3.07065e-06
		1670.2	3.26196e-06
		1671.6	3.45654e-06
		1673	3.65395e-06
		1674.4	3.85383e-06
		1675.8	4.05583e-06
		1677.2	4.2597e-06
		1678.6	4.46523e-06
		1680	4.67231e-06
		1681.4	4.8809e-06
		1682.8	5.09125e-06
		1684.2	5.3032e-06
		1685.6	5.51708e-06
		1687	5.73315e-06
		1688.4	5.95166e-06
		1689.8	6.17283e-06
		1691.2	6.39681e-06
		1692.6	6.62356e-06
		1694	6.85285e-06
		1695.4	7.08413e-06
		1696.8	7.31687e-06
		1698.2	7.54912e-06
		1699.6	7.77936e-06
		1701	8.00528e-06
		1702.4	8.22406e-06
		1703.8	8.43245e-06
		1705.2	8.62681e-06
		1706.6	8.80322e-06
		1708	8.95783e-06
		1709.4	9.08637e-06
		1710.8	9.18529e-06
		1712.2	9.25137e-06
		1713.6	9.28214e-06
		1715	9.27604e-06
		1716.4	9.23258e-06
		1717.8	9.15253e-06
		1719.2	9.03794e-06
		1720.6	8.89216e-06
		1722	8.71982e-06
		1723.4	8.52662e-06
		1724.8	8.31921e-06
		1726.2	8.10491e-06
		1727.6	7.89139e-06
		1729	7.68639e-06
		1730.4	7.4974e-06
		1731.8	7.33132e-06
		1733.2	7.19424e-06
		1734.6	7.09115e-06
		1736	7.02585e-06
		1737.4	7.00079e-06
		1738.8	7.01708e-06
		1740.2	7.07451e-06
		1741.6	7.17171e-06
		1743	7.30622e-06
		1744.4	7.47475e-06
		1745.8	7.67336e-06
		1747.2	7.8977e-06
		1748.6	8.14319e-06
		1750	8.40524e-06
		1751.4	8.67938e-06
		1752.8	8.96137e-06
		1754.2	9.24732e-06
		1755.6	9.53364e-06
		1757	9.8171e-06
		1758.4	1.00948e-05
		1759.8	1.03639e-05
		1761.2	1.06219e-05
		1762.6	1.08664e-05
		1764	1.10947e-05
		1765.4	1.13044e-05
		1766.8	1.14927e-05
		1768.2	1.16568e-05
		1769.6	1.1794e-05
		1771	1.19013e-05
		1772.4	1.19758e-05
		1773.8	1.20147e-05
		1775.2	1.20156e-05
		1776.6	1.19761e-05
		1778	1.18947e-05
		1779.4	1.17698e-05
		1780.8	1.16014e-05
		1782.2	1.13892e-05
		1783.6	1.1134e-05
		1785	1.08378e-05
		1786.4	1.05027e-05
		1787.8	1.01313e-05
		1789.2	9.72788e-06
		1790.6	9.29619e-06
		1792	8.84082e-06
		1793.4	8.36662e-06
		1794.8	7.87865e-06
		1796.2	7.382e-06
		1797.6	6.88171e-06
		1799	6.38263e-06
		1800.4	5.88938e-06
		1801.8	5.40618e-06
		1803.2	4.93685e-06
		1804.6	4.48474e-06
		1806	4.05267e-06
		1807.4	3.64295e-06
		1808.8	3.25733e-06
		1810.2	2.89707e-06
		1811.6	2.56293e-06
		1813	2.25546e-06
		1814.4	1.97419e-06
		1815.8	1.71884e-06
		1817.2	1.48866e-06
		1818.6	1.28266e-06
		1820	1.09956e-06
		1821.4	9.38407e-07
		1822.8	7.97706e-07
		1824.2	6.76173e-07
		1825.6	5.72614e-07
		1827	4.85983e-07
		1828.4	4.15442e-07
		1829.8	3.60422e-07
		1831.2	3.20672e-07
		1832.6	2.96308e-07
		1834	2.87845e-07
		1835.4	2.96216e-07
		1836.8	3.22764e-07
		1838.2	3.69218e-07
		1839.6	4.37622e-07
		1841	5.30241e-07
		1842.4	6.49415e-07
		1843.8	7.97383e-07
		1845.2	9.76063e-07
		1846.6	1.18681e-06
		1848	1.43016e-06
		1849.4	1.70557e-06
		1850.8	2.01106e-06
		1852.2	2.34361e-06
		1853.6	2.69811e-06
		1855	3.06802e-06
		1856.4	3.44527e-06
		1857.8	3.82052e-06
		1859.2	4.18328e-06
		1860.6	4.52305e-06
		1862	4.82873e-06
		1863.4	5.08999e-06
		1864.8	5.29759e-06
		1866.2	5.44399e-06
		1867.6	5.52354e-06
		1869	5.53362e-06
		1870.4	5.47361e-06
		1871.8	5.34577e-06
		1873.2	5.15489e-06
		1874.6	4.90796e-06
		1876	4.61376e-06
		1877.4	4.28234e-06
		1878.8	3.92445e-06
		1880.2	3.551e-06
		1881.6	3.17244e-06
		1883	2.7984e-06
		1884.4	2.43723e-06
		1885.8	2.09584e-06
		1887.2	1.77947e-06
		1888.6	1.49175e-06
		1890	1.23473e-06
		1891.4	1.00907e-06
		1892.8	8.14227e-07
		1894.2	6.48694e-07
		1895.6	5.10278e-07
		1897	3.9632e-07
		1898.4	3.03919e-07
		1899.8	2.30114e-07
		1901.2	1.72028e-07
		1902.6	1.26978e-07
		1904	9.25399e-08
		1905.4	6.6589e-08
		1906.8	4.73095e-08
		1908.2	3.31869e-08
		1909.6	2.29857e-08
		1911	1.57189e-08
		1912.4	1.06134e-08
		1913.8	7.07562e-09
		1915.2	4.65741e-09
		1916.6	3.02689e-09
		1918	1.94233e-09
		1919.4	1.23061e-09
		1920.8	7.6982e-10
		1922.2	6.76466e-10
		1923.6	5.86625e-10
		1925	6.09091e-10
		1926.4	6.31461e-10
		1927.8	9.10629e-10
		1929.2	1.30308e-09
		1930.6	1.85026e-09
		1932	2.60694e-09
		1933.4	3.64471e-09
		1934.8	5.05625e-09
		1936.2	6.96032e-09
		1937.6	9.50744e-09
		1939	1.28864e-08
		1940.4	1.73315e-08
		1941.8	2.31298e-08
		1943.2	3.06298e-08
		1944.6	4.02485e-08
		1946	5.24795e-08
		1947.4	6.78991e-08
		1948.8	8.7171e-08
		1950.2	1.11049e-07
		1951.6	1.40376e-07
		1953	1.76077e-07
		1954.4	2.19153e-07
		1955.8	2.70662e-07
		1957.2	3.31697e-07
		1958.6	4.03357e-07
		1960	4.86712e-07
		1961.4	5.82758e-07
		1962.8	6.92372e-07
		1964.2	8.16252e-07
		1965.6	9.54868e-07
		1967	1.10858e-06
		1968.4	1.27693e-06
		1969.8	1.4595e-06
		1971.2	1.65532e-06
		1972.6	1.86293e-06
		1974	2.08042e-06
		1975.4	2.30541e-06
		1976.8	2.53505e-06
		1978.2	2.76611e-06
		1979.6	2.99503e-06
		1981	3.21798e-06
		1982.4	3.431e-06
		1983.8	3.63009e-06
		1985.2	3.81138e-06
		1986.6	3.9712e-06
		1988	4.10628e-06
		1989.4	4.21382e-06
		1990.8	4.29162e-06
		1992.2	4.33817e-06
		1993.6	4.35274e-06
		1995	4.33536e-06
		1996.4	4.2869e-06
		1997.8	4.20923e-06
		1999.2	4.10439e-06
		2000.6	3.9756e-06
		2002	3.82651e-06
		2003.4	3.6612e-06
		2004.8	3.48416e-06
		2006.2	3.30005e-06
		2007.6	3.11368e-06
		2009	2.92985e-06
		2010.4	2.75327e-06
		2011.8	2.58847e-06
		2013.2	2.4398e-06
		2014.6	2.31134e-06
		2016	2.20692e-06
		2017.4	2.13011e-06
		2018.8	2.08425e-06
		2020.2	2.07244e-06
		2021.6	2.0976e-06
		2023	2.16238e-06
		2024.4	2.26919e-06
		2025.8	2.42012e-06
		2027.2	2.61678e-06
		2028.6	2.86021e-06
		2030	3.15062e-06
		2031.4	3.48726e-06
		2032.8	3.86809e-06
		2034.2	4.28963e-06
		2035.6	4.74677e-06
		2037	5.23259e-06
		2038.4	5.73843e-06
		2039.8	6.25387e-06
		2041.2	6.76702e-06
		2042.6	7.26482e-06
		2044	7.73354e-06
		2045.4	8.15933e-06
		2046.8	8.52888e-06
		2048.2	8.83011e-06
		2049.6	9.05279e-06
		2051	9.18912e-06
		2052.4	9.23418e-06
		2053.8	9.18623e-06
		2055.2	9.04677e-06
		2056.6	8.82046e-06
		2058	8.51481e-06
		2059.4	8.13975e-06
		2060.8	7.70701e-06
		2062.2	7.22949e-06
		2063.6	6.72057e-06
		2065	6.19328e-06
		2066.4	5.66043e-06
		2067.8	5.13299e-06
		2069.2	4.62056e-06
		2070.6	4.13097e-06
		2072	3.67015e-06
		2073.4	3.24219e-06
		2074.8	2.84952e-06
		2076.2	2.49305e-06
		2077.6	2.17248e-06
		2079	1.88652e-06
		2080.4	1.6332e-06
		2081.8	1.4101e-06
		2083.2	1.21454e-06
		2084.6	1.04377e-06
		2086	8.95083e-07
		2087.4	7.65934e-07
		2088.8	6.53958e-07
		2090.2	5.57023e-07
		2091.6	4.73231e-07
		2093	4.00908e-07
		2094.4	3.38591e-07
		2095.8	2.85003e-07
		2097.2	2.39029e-07
		2098.6	1.99696e-07
		2100	1.66153e-07
		2101.4	1.37649e-07
		2102.8	1.13523e-07
		2104.2	9.31908e-08
		2105.6	7.61345e-08
		2107	6.18956e-08
		2108.4	4.99237e-08
		2109.8	4.02117e-08
		2111.2	3.22166e-08
		2112.6	2.56736e-08
		2114	2.03506e-08
		2115.4	1.60452e-08
		2116.8	1.25833e-08
		2118.2	9.81584e-09
		2119.6	7.61622e-09
		2121	5.87804e-09
		2122.4	4.51238e-09
		2123.8	3.44557e-09
		2125.2	2.61695e-09
		2126.6	1.97703e-09
		2128	1.48563e-09
		2129.4	1.11042e-09
		2130.8	8.25555e-10
		2132.2	6.105e-10
		2133.6	4.49062e-10
		2135	3.28555e-10
		2136.4	2.39106e-10
		2137.8	1.73082e-10
		2139.2	0
		2140.6	0
		2142	0
		2143.4	0
		2144.8	0
		2146.2	0
		2147.6	0
		2149	0
		2150.4	0
		2151.8	0
		2153.2	0
		2154.6	0
		2156	0
		2157.4	0
		2158.8	0
		2160.2	0
		2161.6	0
		2163	0
		2164.4	0
		2165.8	0
		2167.2	0
		2168.6	0
		2170	0
		2171.4	0
		2172.8	0
		2174.2	0
		2175.6	0
		2177	0
		2178.4	0
		2179.8	0
		2181.2	0
		2182.6	0
		2184	0
		2185.4	0
		2186.8	0
		2188.2	0
		2189.6	0
		2191	0
		2192.4	0
		2193.8	0
		2195.2	0
		2196.6	0
		2198	0
		2199.4	0
		2200.8	0
		2202.2	0
		2203.6	0
		2205	0
		2206.4	0
		2207.8	0
		2209.2	0
		2210.6	0
		2212	0
		2213.4	0
		2214.8	0
		2216.2	0
		2217.6	0
		2219	0
		2220.4	0
		2221.8	0
		2223.2	0
		2224.6	0
		2226	0
		2227.4	0
		2228.8	0
		2230.2	0
		2231.6	0
		2233	0
		2234.4	0
		2235.8	0
		2237.2	0
		2238.6	0
		2240	0
		2241.4	0
		2242.8	0
		2244.2	0
		2245.6	0
		2247	0
		2248.4	0
		2249.8	0
		2251.2	0
		2252.6	0
		2254	0
		2255.4	0
		2256.8	0
		2258.2	0
		2259.6	0
		2261	0
		2262.4	0
		2263.8	0
		2265.2	0
		2266.6	0
		2268	0
		2269.4	0
		2270.8	0
		2272.2	0
		2273.6	0
		2275	0
		2276.4	0
		2277.8	0
		2279.2	0
		2280.6	0
		2282	0
		2283.4	0
		2284.8	0
		2286.2	0
		2287.6	0
		2289	0
		2290.4	0
		2291.8	0
		2293.2	0
		2294.6	0
		2296	0
		2297.4	0
		2298.8	0
		2300.2	0
		2301.6	0
		2303	0
		2304.4	0
		2305.8	0
		2307.2	0
		2308.6	0
		2310	0
		2311.4	0
		2312.8	0
		2314.2	0
		2315.6	0
		2317	0
		2318.4	0
		2319.8	0
		2321.2	0
		2322.6	0
		2324	0
		2325.4	0
		2326.8	0
		2328.2	0
		2329.6	0
		2331	0
		2332.4	0
		2333.8	0
		2335.2	0
		2336.6	0
		2338	0
		2339.4	0
		2340.8	0
		2342.2	0
		2343.6	0
		2345	0
		2346.4	0
		2347.8	0
		2349.2	0
		2350.6	0
		2352	0
		2353.4	0
		2354.8	0
		2356.2	0
		2357.6	0
		2359	0
		2360.4	0
		2361.8	0
		2363.2	0
		2364.6	0
		2366	0
		2367.4	0
		2368.8	0
		2370.2	0
		2371.6	0
		2373	0
		2374.4	0
		2375.8	0
		2377.2	0
		2378.6	0
		2380	0
		2381.4	0
		2382.8	0
		2384.2	0
		2385.6	0
		2387	0
		2388.4	0
		2389.8	0
		2391.2	0
		2392.6	0
		2394	0
		2395.4	0
		2396.8	0
		2398.2	0
		2399.6	0
		2401	0
		2402.4	0
		2403.8	0
		2405.2	0
		2406.6	0
		2408	0
		2409.4	0
		2410.8	0
		2412.2	0
		2413.6	0
		2415	0
		2416.4	0
		2417.8	0
		2419.2	0
		2420.6	0
		2422	0
		2423.4	0
		2424.8	0
		2426.2	0
		2427.6	0
		2429	0
		2430.4	0
		2431.8	0
		2433.2	0
		2434.6	0
		2436	0
		2437.4	0
		2438.8	0
		2440.2	0
		2441.6	0
		2443	0
		2444.4	0
		2445.8	0
		2447.2	0
		2448.6	0
		2450	0
		2451.4	0
		2452.8	0
		2454.2	0
		2455.6	0
		2457	0
		2458.4	0
		2459.8	0
		2461.2	0
		2462.6	0
		2464	0
		2465.4	0
		2466.8	0
		2468.2	0
		2469.6	0
		2471	0
		2472.4	0
		2473.8	0
		2475.2	0
		2476.6	0
		2478	0
		2479.4	0
		2480.8	0
		2482.2	0
		2483.6	0
		2485	0
		2486.4	0
		2487.8	0
		2489.2	0
		2490.6	0
		2492	0
		2493.4	0
		2494.8	0
		2496.2	0
		2497.6	0
		2499	0
		2500.4	0
		2501.8	0
		2503.2	0
		2504.6	0
		2506	0
		2507.4	0
		2508.8	0
		2510.2	0
		2511.6	0
		2513	0
		2514.4	0
		2515.8	0
		2517.2	0
		2518.6	0
		2520	0
		2521.4	0
		2522.8	0
		2524.2	0
		2525.6	0
		2527	0
		2528.4	0
		2529.8	0
		2531.2	0
		2532.6	0
		2534	0
		2535.4	0
		2536.8	0
		2538.2	0
		2539.6	0
		2541	0
		2542.4	0
		2543.8	0
		2545.2	0
		2546.6	0
		2548	0
		2549.4	0
		2550.8	0
		2552.2	0
		2553.6	0
		2555	0
		2556.4	0
		2557.8	0
		2559.2	0
		2560.6	0
		2562	0
		2563.4	0
		2564.8	0
		2566.2	0
		2567.6	1.72978e-10
		2569	3.02453e-10
		2570.4	5.20796e-10
		2571.8	8.83123e-10
		2573.2	1.47475e-09
		2574.6	2.42527e-09
		2576	3.92777e-09
		2577.4	6.26435e-09
		2578.8	9.83896e-09
		2580.2	1.52183e-08
		2581.6	2.31808e-08
		2583	3.47723e-08
		2584.4	5.13668e-08
		2585.8	7.47267e-08
		2587.2	1.07057e-07
		2588.6	1.51041e-07
		2590	2.09855e-07
		2591.4	2.87136e-07
		2592.8	3.86902e-07
		2594.2	5.13402e-07
		2595.6	6.70901e-07
		2597	8.63383e-07
		2598.4	1.09436e-06
		2599.8	1.36588e-06
		2601.2	1.67886e-06
		2602.6	2.03222e-06
		2604	2.42259e-06
		2605.4	2.84411e-06
		2606.8	3.28835e-06
		2608.2	3.74438e-06
		2609.6	4.19915e-06
		2611	4.63805e-06
		2612.4	5.0457e-06
		2613.8	5.40682e-06
		2615.2	5.70733e-06
		2616.6	5.9353e-06
		2618	6.08208e-06
		2619.4	6.14241e-06
		2620.8	6.11572e-06
		2622.2	6.00578e-06
		2623.6	5.82075e-06
		2625	5.57265e-06
		2626.4	5.27668e-06
		2627.8	4.95037e-06
		2629.2	4.61257e-06
		2630.6	4.28245e-06
		2632	3.97867e-06
		2633.4	3.71858e-06
		2634.8	3.51765e-06
		2636.2	3.38912e-06
		2637.6	3.34375e-06
		2639	3.38979e-06
		2640.4	3.53291e-06
		2641.8	3.77615e-06
		2643.2	4.11991e-06
		2644.6	4.56165e-06
		2646	5.09568e-06
		2647.4	5.71272e-06
		2648.8	6.39958e-06
		2650.2	7.13885e-06
		2651.6	7.90909e-06
		2653	8.68428e-06
		2654.4	9.43566e-06
		2655.8	1.01322e-05
		2657.2	1.07425e-05
		2658.6	1.12368e-05
		2660	1.15886e-05
		2661.4	1.17774e-05
		2662.8	1.17902e-05
		2664.2	1.16232e-05
		2665.6	1.12817e-05
		2667	1.07807e-05
		2668.4	1.01436e-05
		2669.8	9.4011e-06
		2671.2	8.58877e-06
		2672.6	7.746e-06
		2674	6.91251e-06
		2675.4	6.12743e-06
		2676.8	5.42735e-06
		2678.2	4.84492e-06
		2679.6	4.40758e-06
		2681	4.13641e-06
		2682.4	4.04492e-06
		2683.8	4.13779e-06
		2685.2	4.40969e-06
		2686.6	4.84437e-06
		2688	5.41435e-06
		2689.4	6.08163e-06
		2690.8	6.79948e-06
		2692.2	7.51568e-06
		2693.6	8.17675e-06
		2695	8.73294e-06
		2696.4	9.14327e-06
		2697.8	9.37972e-06
		2699.2	9.43014e-06
		2700.6	9.29908e-06
		2702	9.00659e-06
		2703.4	8.58508e-06
		2704.8	8.07488e-06
		2706.2	7.51907e-06
		2707.6	6.95863e-06
		2709	6.4283e-06
		2710.4	5.95385e-06
		2711.8	5.55138e-06
		2713.2	5.22662e-06
		2714.6	4.9771e-06
		2716	4.79389e-06
		2717.4	4.664e-06
		2718.8	4.57253e-06
		2720.2	4.50447e-06
		2721.6	4.44652e-06
		2723	4.38713e-06
		2724.4	4.31748e-06
		2725.8	4.23142e-06
		2727.2	4.1252e-06
		2728.6	3.9972e-06
		2730	3.84749e-06
		2731.4	3.67751e-06
		2732.8	3.48966e-06
		2734.2	3.28704e-06
		2735.6	3.07311e-06
		2737	2.85155e-06
		2738.4	2.62591e-06
		2739.8	2.40004e-06
		2741.2	2.17699e-06
		2742.6	1.95972e-06
		2744	1.75078e-06
		2745.4	1.55228e-06
		2746.8	1.36587e-06
		2748.2	1.19274e-06
		2749.6	1.03368e-06
		2751	8.89042e-07
		2752.4	7.58858e-07
		2753.8	6.42833e-07
		2755.2	5.40426e-07
		2756.6	4.50894e-07
		2758	3.73347e-07
		2759.4	3.06796e-07
		2760.8	2.50201e-07
		2762.2	2.02501e-07
		2763.6	1.62654e-07
		2765	1.29659e-07
		2766.4	1.02575e-07
		2767.8	8.05337e-08
		2769.2	6.27503e-08
		2770.6	4.85237e-08
		2772	3.72384e-08
		2773.4	2.83615e-08
		2774.8	2.14372e-08
		2776.2	1.60807e-08
		2777.6	1.19714e-08
		2779	8.84466e-09
		2780.4	6.48513e-09
		2781.8	4.71907e-09
		2783.2	3.40796e-09
		2784.6	2.44249e-09
		2786	1.73728e-09
		2787.4	1.22633e-09
		2788.8	8.59105e-10
		2790.2	5.97288e-10
		2791.6	4.12118e-10
		2793	2.82202e-10
		2794.4	1.91777e-10
		2795.8	0
		2797.2	0
		2798.6	0
[truncated: 1 more rows]

## Sheet: Dataset information
RIVERS		n(total)=	n(<250Ma)=	% <250 Ma
Talkeetna Mountains	TM 1-20 samples plus CB-41	5820	5656	0.971821
Western Alaska Range	Lease et al., 2016 (1-6), Beluga River (07EF32)	419	397	0.947494
Central Alaska Range	Lease et al., 2016 (7-11)	487	463	0.950719
Eastern Alaska Range	Upper Susitna (CB-59), Lease et al., 2016 (12a)	186	184	0.989247
Chugach Mountains	Eagle River (CB-58), Knik River (CB-57), Matanuska River at glacier (CB-44)	969	914	0.94324
Yukon-Tanana Uplands	Bedrock data	125	125	1
				0.960504
STRATA
Pliocene	CB-53, CB-11, CB-20	916	893	0.974891
Late Miocene	CB-07, CB-08, CB-17, CB-22	1248	1165	0.933494
Early-middle Miocene	CB-12, CB-16, CB-18, CB-23	1023	895	0.874878
Oligocene	CB-51, CB-04	342	255	0.745614
Eocene	CB-21, CB-13, CB-14	900	644	0.715556
Upper Cretaceous	CB-31, CB-02, CB-38, CB-39, CB-43,CB-30, CB-32, CB-42	2550	2314	0.907451
Lower Cretaceous	CB-33, CB-36, CB-37	1081	1051	0.972248
Jurassic	CB-34, CB-35	618	617	0.998382

## Sheet: Talkeetna Mtns (compiled)
AGE	± (1-s)	Uconc	U/Th	Conc
0.0897683	0.0136664	217.79	1.68529	NA		5656
0.0936197	0.0204762	271.748	2.03983	NA
0.0963625	0.0174869	206.863	2.23405	NA
0.0987123	0.0227575	186.347	1.86115	NA
0.103562	0.0201891	214.423	3.29686	NA
0.103579	0.0236473	197.942	2.46544	NA
0.106902	0.0224353	127.28	2.13203	NA
0.162895	0.0286925	430.477	0.876731	NA
0.171225	0.030373	501.127	0.97807	NA
0.183565	0.0338223	382.972	1.73129	NA
0.262441	0.0649313	245.563	1.80896	NA
0.341895	0.0705532	315.531	2.29285	NA
0.408076	0.0707865	85.1972	3.23614	NA
0.501129	0.104528	90.5792	3.02442	NA
0.644966	0.0322722	1386.01	0.646072	NA
11.5863	0.494671	109.578	2.15943	NA
37.4755	0.741381	499.633	4.34563	NA
38.9091	1.3707	73.3739	3.60716	NA
40.0308	1.21142	61.4039	4.60691	NA
41.0864	1.24795	165.073	4.43199	NA
41.7464	1.13103	102.1	3.19381	NA
41.9299	1.11165	345.891	2.76375	NA
41.9358	0.989626	97.6808	3.23058	NA
42.1374	1.05121	78.6258	2.81207	NA
42.1524	1.1665	203.525	4.65992	NA
42.1936	1.59936	90.6688	3.14418	NA
42.2022	1.07318	110.604	2.94358	NA
42.2543	0.834934	231.692	3.71892	NA
42.2726	1.30826	104.03	3.50696	NA
42.5388	1.07598	205.028	3.2536	NA
42.6043	1.02958	120.505	3.96177	NA
42.6417	1.49438	75.4754	3.43492	NA
42.7876	2.15032	19.2424	4.59694	NA
42.8382	1.3926	153.046	3.10447	NA
43.0034	1.2731	82.1306	4.80762	NA
43.025	1.17434	141.849	3.01029	NA
43.0848	1.34437	71.8477	3.7267	NA
43.1181	1.49462	283.903	2.17916	NA
43.328	1.1741	103.798	3.95928	NA
43.4521	1.22133	125.185	3.37456	NA
43.4941	1.13519	109.256	2.83291	NA
43.6302	1.0777	101.3	2.68983	NA
43.7266	0.99918	145.707	3.53438	NA
43.7417	1.27544	182.977	3.68164	NA
43.7662	1.2433	254.84	2.56884	NA
43.8651	1.16818	226.022	4.27911	NA
44.0014	1.16291	186.835	2.92618	NA
44.0103	1.29095	119.194	3.86508	NA
44.0184	1.49449	94.782	3.74438	NA
44.1004	1.2869	196.535	2.54585	NA
44.1296	1.51896	246.59	2.81639	NA
44.1499	1.07016	139.32	6.20215	NA
44.2015	1.16673	78.7693	4.52287	NA
44.2023	1.1207	318.694	2.79549	NA
44.207	1.13618	149.61	2.60238	NA
44.249	1.12157	199.628	5.1788	NA
44.2616	1.09434	207.562	3.00923	NA
44.2955	1.19301	222.942	2.29515	NA
44.3161	1.10848	167.312	2.98028	NA
44.3493	1.8889	81.3503	2.72681	NA
44.3746	1.13299	124.509	2.64588	NA
44.4151	1.35659	160.927	3.0052	NA
44.4337	1.22771	213.883	3.658	NA
44.4943	1.30724	124.046	2.56551	NA
44.5236	1.12445	228.939	2.6995	NA
44.543	1.25465	72.3635	4.42601	NA
44.5574	1.42673	109.43	5.33716	NA
44.5734	1.00986	304.47	3.6898	NA
44.5867	1.26893	244.12	3.85676	NA
44.5867	1.21773	72.127	5.62437	NA
44.5935	0.851582	460.093	2.70356	NA
44.6322	1.03871	186.09	3.24474	NA
44.6347	1.35873	82.287	3.47798	NA
44.635	1.15158	101.655	4.33112	NA
44.6578	1.27767	309.114	3.11843	NA
44.6704	0.98315	278.925	3.06157	NA
44.6757	1.48497	56.1344	4.11207	NA
44.686	1.37921	217.292	5.12959	NA
44.6894	1.4318	85.7716	4.17245	NA
44.6949	1.12152	157.232	4.08637	NA
44.6971	0.93291	262.279	2.97016	NA
44.7024	0.983905	219.079	2.79722	NA
44.7222	1.46836	177.179	2.31318	NA
44.7499	1.03574	156.817	3.41999	NA
44.7836	1.42682	85.0959	3.66292	NA
44.7912	1.71424	493.87	4.09999	NA
44.8591	0.94997	126.837	4.04602	NA
44.8816	1.36463	125.084	3.20532	NA
44.8858	1.23778	458.377	2.6376	NA
44.8875	1.21509	167.483	3.18952	NA
44.9274	1.26913	220.364	2.51778	NA
44.9294	1.46888	284.365	2.25771	NA
44.9368	1.62855	117.209	5.83714	NA
44.9423	1.32505	131.885	2.69497	NA
44.9535	1.18341	243.86	3.7684	NA
44.9983	1.18552	288.125	3.66796	NA
45.0133	1.53912	52.1107	9.67048	NA
45.0237	1.17381	197.323	4.02262	NA
45.0754	1.01693	299.38	2.54493	NA
45.0803	1.83705	31.0274	9.4696	NA
45.1061	1.04157	100.891	3.07546	NA
45.109	1.44997	106.327	3.55952	NA
45.1131	1.30396	41.9334	6.97088	NA
45.1304	0.91496	186.065	3.27976	NA
45.1796	1.38216	309.816	4.40996	NA
45.2137	1.01702	231.038	3.56751	NA
45.2225	1.32886	254.959	3.99247	NA
45.3007	1.23225	47.7309	5.14772	NA
45.3184	1.34821	440.571	3.33842	NA
45.3439	1.16867	166.802	3.48802	NA
45.3825	1.53031	225.497	3.378	NA
45.4216	1.31192	165.362	3.02575	NA
45.453	0.92335	218.292	4.52922	NA
45.454	1.0036	313.947	5.18993	NA
45.4727	1.21279	221.618	3.00575	NA
45.52	1.65459	187.253	4.93361	NA
45.5201	1.21613	209.412	3.75805	NA
45.5256	1.41367	170.241	3.53713	NA
45.5535	1.36705	146.694	3.61936	NA
45.6317	1.76409	36.175	7.22659	NA
45.6405	1.63796	54.3024	5.41626	NA
45.6582	1.21176	338.013	3.58014	NA
45.6903	1.01566	383.336	3.08999	NA
45.6971	1.04955	251.58	2.25781	NA
45.701	1.36834	224.124	2.46798	NA
45.7264	1.10268	394.222	3.95331	NA
45.7567	1.17639	238.139	3.65706	NA
45.8051	1.4794	260.852	3.42495	NA
45.8057	1.05719	146.054	5.55015	NA
45.8462	1.07405	68.6402	7.0935	NA
45.8537	1.33543	60.6959	7.91983	NA
45.8903	1.29631	243.971	3.79194	NA
45.9126	1.50936	321.539	3.4326	NA
45.961	1.22014	253.367	3.31272	NA
45.9681	1.18688	189.93	2.45285	NA
46.0122	0.932549	248.585	3.46338	NA
46.0254	0.976663	103.734	3.20128	NA
46.1289	1.25093	311.135	3.34871	NA
46.1779	1.33748	105.203	4.6239	NA
46.2454	1.18303	228.734	3.18306	NA
46.2639	1.67508	119.678	2.47184	NA
46.2819	1.59894	99.3018	4.88119	NA
46.299	1.46021	80.1771	5.64391	NA
46.3017	1.61878	74.6592	3.40314	NA
46.3412	1.20621	146.766	4.70402	NA
46.3611	1.64294	425.101	2.85833	NA
46.4119	1.56581	225.849	3.67076	NA
46.4478	1.12318	161.826	6.22419	NA
46.4619	0.906496	282.117	2.23042	NA
46.5639	1.11754	321.881	4.15864	NA
46.6213	1.59171	143.926	5.99811	NA
46.6611	0.873515	188.487	5.3396	NA
46.6625	1.73603	147.303	3.42036	NA
46.7612	1.19254	528.551	1.81468	NA
46.8103	1.23884	157.6	6.08816	NA
46.9338	1.63384	199.684	3.85663	NA
47.0647	0.914062	1062.15	3.66097	NA
47.0997	1.69095	64.0029	6.148	NA
47.3206	1.4455	160.819	4.90311	NA
47.4439	1.40306	59.3601	7.65408	NA
47.4465	0.987199	376.573	6.12767	NA
47.5495	1.33016	634.029	5.57764	NA
47.6154	1.59772	34.9799	9.07789	NA
47.6372	2.55589	229.164	5.05086	NA
47.8891	1.25381	244.808	5.51506	NA
48.0189	0.999853	626.346	2.92033	NA
48.3962	1.47497	58.2306	5.62907	NA
49.1011	1.8333	119.469	3.02012	NA
49.8818	1.58609	212.209	2.23467	NA
52.3147	1.28198	670.54	102.967	NA
52.7115	1.30762	1184.27	2.16479	NA
52.7186	1.24762	400.348	6.98482	NA
53.2239	1.48398	305.277	5.73364	NA
53.7728	1.20386	368.713	2.24378	NA
54.1807	4.08938	149.786	5.06363	NA
54.5936	1.36375	2066.27	2.38859	NA
54.6714	1.51361	253.859	1.93993	NA
54.7787	1.49635	121.044	3.4377	NA
55.4005	1.40829	1178.36	3.37747	NA
55.5641	1.00466	484.768	3.31753	NA
55.6696	1.44729	233.876	2.36141	NA
56.0029	1.66944	758.995	3.16062	NA
56.0992	1.27836	61.6752	3.58275	NA
56.1504	1.49622	162.103	3.46961	NA
56.2105	1.44432	954.649	4.22417	NA
56.2927	1.7338	159.609	2.24174	NA
56.4341	1.60994	188.623	3.0684	NA
56.6152	1.37403	881.225	3.99903	NA
56.7884	2.15162	99.9713	3.32728	NA
56.8096	1.33157	212.527	5.41085	NA
56.8314	1.22542	485.563	4.14214	NA
56.9165	1.22577	1246.44	2.40265	NA
56.9268	1.44831	456.26	2.92675	NA
56.9902	1.24412	685.854	2.71951	NA
57.0009	1.33855	561.656	3.25625	NA
57.1407	2.11664	423.164	2.22275	NA
57.1413	1.63914	280.963	2.45023	NA
57.1604	1.58306	1191.33	13.3405	NA
57.1799	1.58705	764.195	10.189	NA
57.2244	1.57561	96.8725	5.05712	NA
57.2341	1.72362	62.7889	5.02906	NA
57.2747	1.74899	584.345	3.45126	NA
57.2781	1.57019	320.233	3.46693	NA
57.3171	1.24464	348.671	4.47025	NA
57.3772	1.44401	150.949	2.93725	NA
57.3986	1.58269	204.214	2.77739	NA
57.4164	1.28881	195.133	4.60335	NA
57.4261	1.51668	581.899	3.92062	NA
57.4378	1.70226	126.669	4.29568	NA
57.4409	1.25904	828.493	4.41877	NA
57.4619	1.2772	588.906	6.65705	NA
57.5038	2.14509	96.6705	4.02618	NA
57.5162	1.49857	343.987	2.50277	NA
57.5884	1.78708	103.123	4.19776	NA
57.6028	1.74342	162.378	4.49798	NA
57.624	1.08416	511.006	2.54837	NA
57.6457	1.71002	439.625	3.36444	NA
57.6546	1.61818	324.842	2.53895	NA
57.6567	1.25824	1346.95	3.85013	NA
57.6641	1.32891	404.702	2.7772	NA
57.6735	1.81571	365.73	5.34216	NA
57.6887	1.913	247.542	4.8163	NA
57.7228	1.87303	154.095	3.36823	NA
57.7715	1.27694	252.375	3.13643	NA
57.7871	1.49318	573.308	3.58877	NA
57.7895	1.72804	487.676	2.31345	NA
57.7896	1.63272	339.239	2.37217	NA
57.8292	1.78586	203.436	4.88852	NA
57.8363	1.37607	495.091	3.91886	NA
57.8365	1.27626	283.012	3.70257	NA
57.8493	1.6359	1386.07	2.4149	NA
57.8967	1.44963	1336.62	3.82428	NA
57.9028	1.28351	1094.12	2.34485	NA
57.9033	1.69938	408.432	2.87198	NA
57.9278	1.63968	134.557	4.55852	NA
57.968	1.58247	802.681	3.04412	NA
57.9738	2.25971	64.4536	4.79391	NA
57.9753	1.75749	128.682	3.024	NA
58.0198	1.6717	154.439	2.83581	NA
58.0429	1.68042	1605.28	7.24881	NA
58.0447	1.47603	374.431	4.84906	NA
58.0618	1.54364	215.208	2.46676	NA
58.075	1.59183	284.837	5.11997	NA
58.0975	1.74035	137.194	3.45571	NA
58.1016	1.57575	61.3877	3.71509	NA
58.1567	1.66425	355.659	2.51242	NA
58.1779	1.42898	279.788	2.70858	NA
58.2071	1.07131	1691.68	2.56575	NA
58.2298	1.38144	338.161	6.20752	NA
58.2372	1.77742	100.29	5.07316	NA
58.2673	1.7113	167.446	2.82743	NA
58.2813	1.37742	153.539	4.58317	NA
58.3062	1.34301	307.066	2.43919	NA
58.3317	1.45762	444.346	3.39467	NA
58.3329	1.38635	360.54	3.06236	NA
58.3424	1.23141	706.894	2.59571	NA
58.3567	1.8244	370.633	3.05621	NA
58.37	1.82726	172.556	4.70486	NA
58.3758	1.48759	1221.91	4.97167	NA
58.3788	1.21915	2325.67	5.77906	NA
58.3835	1.69611	242.056	3.21677	NA
58.4159	1.30545	613.009	3.68787	NA
58.4245	1.72659	98.7806	3.882	NA
58.4322	1.79701	169.12	3.27878	NA
58.4554	1.42005	609.314	2.619	NA
58.4611	1.65279	355.929	3.43213	NA
58.4938	1.48168	327.336	3.93843	NA
58.5154	1.25756	110.421	2.74318	NA
58.5257	1.34225	613.272	2.16142	NA
58.5423	1.21304	570.114	3.30286	NA
58.5501	2.209	245	5.37567	NA
58.5615	1.361	262.414	3.7149	NA
58.5629	1.43586	433.095	1.80608	NA
58.5641	1.30505	251.227	2.76226	NA
58.5842	1.3863	343.665	2.52051	NA
58.5991	1.51915	208.106	3.25742	NA
58.6109	1.28223	515.301	2.74143	NA
58.6156	1.60017	658.295	10.3119	NA
58.6314	1.92241	566.822	3.31214	NA
58.6565	1.21042	163.632	5.34538	NA
58.6573	1.50364	141.221	2.53391	NA
58.6668	1.79396	109.833	2.84407	NA
58.668	1.95522	360.942	3.96804	NA
58.687	1.43418	211.075	2.54357	NA
58.7	1.83703	835.667	2.43582	NA
58.7342	1.32005	569.287	2.6223	NA
58.7411	1.49876	139.356	2.96981	NA
58.753	1.25252	224.388	5.70582	NA
58.7642	1.68389	108.382	3.3919	NA
58.7645	1.64001	188.092	2.61199	NA
58.776	1.57512	130.96	3.72025	NA
58.7993	1.53656	450.205	3.35534	NA
58.8276	1.65577	235.416	2.3597	NA
58.8293	2.10609	333.228	3.39814	NA
58.8382	1.55635	186.094	4.58643	NA
58.9008	1.7371	240.041	4.81003	NA
58.9015	0.998696	1832.43	3.81351	NA
58.9085	1.57675	616.164	6.30571	NA
58.9301	1.28077	192.393	3.64427	NA
58.9358	1.48845	116.068	3.69798	NA
58.938	1.71073	114.897	4.52089	NA
58.9464	1.34227	373.168	3.24983	NA
58.948	1.29647	155.087	3.64029	NA
58.9871	1.54182	398.049	2.8025	NA
58.9912	1.12244	548.868	3.05528	NA
58.9951	1.48907	129.526	2.50711	NA
59.013	1.779	540.908	2.03848	NA
59.0164	1.89613	67.4228	3.02266	NA
59.0429	1.78929	292.872	2.62261	NA
59.0725	1.51693	394.619	5.0536	NA
59.074	1.35068	868.287	6.5618	NA
59.0819	1.61076	296.692	2.32566	NA
59.0825	1.66371	560.116	3.04642	NA
59.105	1.5874	88.315	5.34094	NA
59.1056	1.45273	679.75	2.79221	NA
59.1627	1.46568	153.144	3.13921	NA
59.1677	1.50264	327.66	4.78605	NA
59.1793	1.74607	166.683	2.91538	NA
59.1847	1.6865	1278.2	2.61094	NA
59.1914	1.78318	807.023	1.79232	NA
59.195	1.48927	346.83	3.04937	NA
59.2035	1.17601	641.868	4.75995	NA
59.205	1.66969	152.341	3.06215	NA
59.2064	1.54849	501.255	1.63383	NA
59.2296	1.70856	632.935	3.18151	NA
59.2354	1.63973	848.995	3.2172	NA
59.2423	1.35549	137.138	2.78839	NA
59.2681	1.47002	233.623	3.0264	NA
59.2713	1.66463	236.663	4.1604	NA
59.2748	1.00368	638.515	3.71248	NA
59.278	1.70223	175.233	2.21684	NA
59.2844	1.46285	594.463	4.73357	NA
59.2907	1.55078	428.317	2.63157	NA
59.3091	1.41284	220.056	3.33159	NA
59.3428	1.52353	365.15	2.82198	NA
59.3625	1.33847	1346.16	3.55709	NA
59.3954	1.75186	198.261	4.0937	NA
59.4055	1.83168	262.071	3.02694	NA
59.4211	1.45258	400.329	2.09395	NA
59.423	2.0583	344.201	4.24295	NA
59.4384	1.22961	717.672	5.26693	NA
59.4627	1.87269	559.096	3.10253	NA
59.4748	1.62709	326.846	5.0363	NA
59.475	1.74464	214.63	3.77899	NA
59.4782	1.45553	115.115	2.04635	NA
59.4812	1.46936	387.826	4.17683	NA
59.4956	1.66967	54.0702	6.24345	NA
59.5195	1.35561	230.06	3.55024	NA
59.5585	1.3407	288.959	2.1625	NA
59.5651	1.26393	89.0871	2.41026	NA
59.5696	1.73468	88.776	5.41259	NA
59.6315	1.71568	118.152	2.88654	NA
59.6831	1.26063	235.658	3.97101	NA
59.6839	1.51746	348.555	3.77285	NA
59.7224	1.55476	461.734	2.36848	NA
59.7482	1.27927	1084.56	3.22217	NA
59.7524	1.43498	675.202	3.53994	NA
59.7551	1.22665	827.72	3.0128	NA
59.7619	1.5172	240.603	2.99504	NA
59.7668	1.53094	1005.08	4.74413	NA
59.7828	1.31415	401.633	3.5709	NA
59.7995	1.74304	362.882	4.17274	NA
59.8117	1.38983	511.995	4.1817	NA
59.8214	1.95997	493.689	2.80666	NA
59.8219	1.63294	275.628	6.55076	NA
59.8816	1.30266	860.022	3.02445	NA
59.8967	1.5722	258.663	3.51652	NA
59.9047	1.47194	181.381	3.96104	NA
59.9306	1.73379	703.006	2.46974	NA
59.9622	1.91862	133.042	3.32989	NA
59.9643	1.56246	304.377	3.22244	NA
59.9713	1.34097	1061.08	3.72124	NA
59.9741	1.28715	78.0093	3.42842	NA
59.9915	1.7905	443.122	1.71987	NA
60.0105	1.31017	329.502	3.05838	NA
60.0174	1.59374	112.249	3.94656	NA
60.0316	1.57833	113.213	4.77161	NA
60.1064	1.22167	213.495	6.36692	NA
60.1216	1.37202	331.371	3.63145	NA
60.1485	1.8043	805.249	2.56622	NA
60.1537	1.77108	189.589	2.92759	NA
60.1726	1.69253	291.298	3.18142	NA
60.1815	1.33111	889.76	5.31267	NA
60.1815	1.64441	67.2191	3.20302	NA
60.2012	1.40646	364.274	6.9315	NA
60.2243	1.81019	540.812	3.57106	NA
60.233	1.4024	126.206	2.87822	NA
60.2728	1.497	205.254	3.56627	NA
60.2757	1.37832	1199.1	4.70847	NA
60.2996	1.42116	462.077	2.74359	NA
60.3193	1.03799	213.503	2.3128	NA
60.3872	1.87028	317.392	3.27998	NA
60.4069	1.85946	234.087	3.20312	NA
60.4089	1.40156	357.86	6.73445	NA
60.4832	1.93633	215.743	2.02086	NA
60.4892	1.38255	230.627	3.27747	NA
60.5059	1.88352	925.516	1.35902	NA
60.5077	1.23353	200.117	3.55064	NA
60.5404	1.79391	148.709	4.1345	NA
60.58	1.79033	187.765	5.21445	NA
60.5844	1.69083	686.186	3.53324	NA
60.5913	1.7143	53.5856	5.0447	NA
60.6117	1.39505	1089.7	2.7964	NA
60.6376	1.80918	251.118	2.48736	NA
60.643	1.55974	367.4	3.90953	NA
60.7366	1.14635	795.549	4.94823	NA
60.7478	1.22509	79.5639	2.31621	NA
60.7506	1.74768	190.996	3.1053	NA
60.7565	1.31289	229.072	4.12428	NA
60.7598	1.44666	366.71	4.98202	NA
60.7726	1.58772	250.949	3.2716	NA
60.7862	1.65842	123.434	2.24952	NA
60.7886	1.95466	327.888	3.31925	NA
60.8093	1.79253	242.532	2.38784	NA
60.9022	1.32313	528.959	2.78981	NA
60.9512	1.4795	143.058	1.98982	NA
60.9595	1.63568	144.773	4.30954	NA
60.975	1.99914	441.926	4.8944	NA
60.998	1.59543	126.133	2.36009	NA
61.0423	1.91819	210.383	2.26472	NA
61.0828	2.02377	119.277	3.44808	NA
61.0975	1.7002	130.163	3.81683	NA
61.0989	1.23257	849.677	4.07383	NA
61.1034	1.12978	406.833	2.96646	NA
61.1503	1.46727	477.301	3.51743	NA
61.1723	1.40402	334.124	3.01133	NA
61.2847	1.10316	921.52	4.74847	NA
61.3338	1.57147	309.391	2.68485	NA
61.3469	1.51657	428.91	4.56285	NA
61.3703	1.93643	310.109	2.96277	NA
61.3743	1.16896	132.017	4.73024	NA
61.3783	1.51196	379.364	5.35108	NA
61.4306	1.63765	521.119	4.1076	NA
61.4309	1.82213	41.7907	3.86513	NA
61.4541	1.4354	387.517	2.42376	NA
61.4801	1.91782	209.655	3.51378	NA
61.4897	1.37711	83.866	2.93424	NA
61.5013	1.55153	186.599	4.02283	NA
61.5243	1.82426	232.255	4.5324	NA
61.5273	2.13892	73.3829	3.39124	NA
61.5311	1.48002	116.398	2.60701	NA
61.5725	1.36054	97.1353	1.9773	NA
61.5779	1.63715	147.729	3.99302	NA
61.6215	2.43548	203.599	4.3077	NA
61.6282	1.8595	282.803	2.52733	NA
61.7096	1.47855	772.589	6.03725	NA
61.7375	1.59379	127.434	4.15335	NA
61.7868	1.96807	78.1032	3.39487	NA
61.9165	1.51242	162.22	2.04683	NA
61.9301	1.88629	161.775	3.92146	NA
61.9409	1.72813	81.8151	2.90648	NA
61.9755	1.58156	112.622	3.16639	NA
62.137	1.36587	65.1167	2.57235	NA
62.1389	1.59637	86.7614	2.49969	NA
62.141	1.57919	862.174	15.6316	NA
62.1536	1.5343	126.746	2.05882	NA
62.1839	1.66325	1228.86	2.52458	NA
62.2474	1.83121	318.138	3.64298	NA
62.29	1.33594	101.404	1.89069	NA
62.3016	1.78655	246.357	2.34864	NA
62.3346	1.36124	120.685	2.4982	NA
62.3406	1.60804	1215.66	4.38245	NA
62.3411	1.33375	133.579	3.22058	NA
62.3435	2.01603	249.341	4.67372	NA
62.3575	1.69439	226.981	3.68352	NA
62.4172	1.63463	275.678	3.86296	NA
62.4248	1.35993	136.652	1.76105	NA
62.4365	1.91702	104.069	2.08338	NA
62.4667	1.60372	188.07	3.64584	NA
62.483	1.23785	671.704	3.30612	NA
62.4948	1.61074	393.682	12.0303	NA
62.5242	1.28688	87.3204	2.84438	NA
62.5367	1.59059	290.39	3.28581	NA
62.5544	1.75143	560.362	1.31316	NA
62.564	1.74943	315.928	3.96449	NA
62.6441	1.70745	105.928	2.38632	NA
62.6567	1.60201	151.807	2.27172	NA
62.6952	4.09754	2072.28	1.87618	NA
62.7309	2.19651	110.701	1.7234	NA
62.7648	1.79653	112.311	2.14399	NA
62.7714	1.51055	402.697	4.47647	NA
62.774	1.55729	174.438	2.27162	NA
62.7757	1.98542	1364.2	3.63674	NA
62.8378	1.29873	424.09	2.09867	NA
63.0041	1.40895	489.731	3.51749	NA
63.1361	1.56452	1850.44	2.32533	NA
63.1375	1.35848	179.933	2.55622	NA
63.1474	1.47867	128.678	2.71681	NA
63.1683	1.93481	321.59	4.42834	NA
63.2087	1.98563	272.803	5.06463	NA
63.2772	1.70054	418.682	3.94885	NA
63.3101	1.79506	688.945	2.14692	NA
63.3407	1.36046	159.08	3.20156	NA
63.3431	1.8196	1344.43	3.38799	NA
63.435	2.05778	1323.64	3.3174	NA
63.446	1.72889	280.768	8.61871	NA
63.4802	1.626	94.5533	2.85419	NA
63.5085	2.3718	40.3496	4.46168	NA
63.5817	1.99898	234.052	2.71594	NA
63.6273	1.61362	187.712	2.07751	NA
63.6341	1.8064	109.487	1.71187	NA
63.6809	2.21109	649.462	5.16844	NA
63.7654	1.9725	767.59	3.67539	NA
63.7845	1.4229	584.969	7.55309	NA
63.8381	1.64182	387.574	2.51884	NA
63.8759	1.88779	100.602	2.30102	NA
63.9247	1.59559	330.512	2.44581	NA
63.9419	1.3542	951.217	4.66422	NA
64.0087	1.60478	4197.59	2.89496	NA
64.0113	1.5512	147.624	1.96848	NA
64.0242	1.54061	484.833	4.64135	NA
64.16	1.96558	72.629	2.96892	NA
64.3152	1.5275	309.939	5.23692	NA
64.322	1.67439	194.366	2.57543	NA
64.3629	1.68649	66.1725	3.32359	NA
64.3656	2.1216	891.331	4.34603	NA
64.3703	3.65257	83.858	3.02659	NA
64.4073	1.84312	251.528	3.54973	NA
64.4782	1.53547	207.741	2.64051	NA
64.5714	1.54716	198.36	2.2966	NA
64.589	1.68981	172.256	2.90804	NA
64.6068	1.4668	1709.17	2.766	NA
64.648	1.85473	117.627	3.34118	NA
64.6902	1.9203	255.128	3.29706	NA
64.6907	2.19177	265.217	4.07371	NA
64.7158	1.37895	646.325	9.23626	NA
64.8123	1.7388	178.246	1.7714	NA
64.8251	1.57927	843.554	6.45995	NA
64.8848	1.875	304.488	1.80886	NA
64.8889	1.42555	115.718	2.01669	NA
65.1728	1.47015	263.112	3.39622	NA
65.2445	1.74404	126.489	3.47887	NA
65.2464	1.9034	96.7686	2.40899	NA
65.3555	2.97927	106.735	5.40734	NA
65.4537	1.50155	80.2583	3.14325	NA
65.4585	1.89156	164.394	2.27226	NA
65.8052	1.39654	777.121	3.2922	NA
65.8701	1.3329	150.08	3.17193	NA
65.957	2.02242	102.198	2.16231	NA
66.0105	2.0604	101.384	2.75217	NA
66.0725	2.08363	103.743	4.72914	NA
66.0811	1.97741	478.843	2.87019	NA
66.2589	1.91716	279.906	5.8506	NA
66.2991	2.05361	426.715	3.04643	NA
66.432	1.99681	897.168	3.40183	NA
66.5159	2.05551	64.2396	2.98753	NA
66.5706	1.93726	94.7377	3.24371	NA
66.5855	1.59604	97.0663	3.65528	NA
66.6542	2.39491	75.5684	2.98736	NA
66.9791	2.15035	542.395	8.86395	NA
67.0166	1.99451	34.8805	3.21336	NA
67.0186	1.85755	566.098	5.20793	NA
67.0586	1.68658	594.351	9.82972	NA
67.1162	1.85799	189.746	2.96663	NA
67.1873	1.79397	167.411	2.00582	NA
67.2227	1.67775	253.038	1.53905	NA
67.2635	1.85159	128.569	1.96712	NA
67.3711	2.22734	132.561	2.42715	NA
67.3991	1.68928	616.568	3.58515	NA
67.4716	1.56827	98.2068	3.8685	NA
67.5006	1.3748	435.899	2.25761	NA
67.5033	2.27377	111.836	2.63847	NA
67.6069	2.0107	163.122	3.2751	NA
67.6419	2.6095	63.0325	2.3553	NA
67.6494	1.50469	1058.1	18.3754	NA
67.6953	1.70689	517.57	5.4522	NA
67.7282	1.55308	374.686	3.16949	NA
67.731	2.15284	71.1083	2.49424	NA
67.8217	1.49154	226.388	2.99655	NA
67.8473	1.55245	122.878	3.01352	NA
67.8544	1.64707	288.951	1.67442	NA
67.8698	1.59006	700.65	4.29093	NA
67.9626	1.79053	36.2482	2.79246	NA
68.0133	2.02071	91.6226	2.89397	NA
68.0178	2.08907	66.2501	2.53752	NA
68.0253	1.75267	115.531	3.03704	NA
68.0359	2.25121	89.8724	2.69077	NA
68.0869	1.34153	62.3955	2.33347	NA
68.22	1.67625	105.272	2.66533	NA
68.2519	2.32351	91.9511	3.05677	NA
68.2713	2.25761	124.103	2.20915	NA
68.2763	2.39031	106.465	2.78572	NA
68.416	1.95782	93.8423	3.45949	NA
68.4274	1.99912	361.63	12.0341	NA
68.4584	2.02518	102.116	3.87071	NA
68.4672	1.44914	3091.29	3.43502	NA
68.4866	1.62922	197.278	3.17742	NA
68.521	1.7193	127.3	2.82372	NA
68.5349	1.49498	113.796	3.6094	NA
68.5523	2.02766	152.143	1.6865	NA
68.5563	2.1559	105.217	1.89936	NA
68.5842	2.55765	35.395	3.58891	NA
68.6586	1.90047	120.478	3.38839	NA
68.6747	1.84812	47.9689	3.02338	NA
68.6828	2.14458	177.273	1.92733	NA
68.6853	1.88512	84.0915	2.1148	NA
68.7381	1.96779	135.969	2.56217	NA
68.7403	2.14333	52.3739	2.80063	NA
68.7492	1.9467	284.005	2.22687	NA
68.7635	2.25513	113.584	5.28614	NA
68.7968	2.02941	113.461	2.04178	NA
68.8218	2.16223	97.0416	3.11081	NA
68.8277	1.71106	65.1588	2.19989	NA
68.8587	1.54538	132.356	1.8911	NA
68.8871	1.64264	160.552	1.75042	NA
68.8885	1.46069	162.825	2.61331	NA
68.8993	1.86696	124.717	1.74962	NA
68.9133	2.04399	63.9748	2.62281	NA
68.9204	2.21471	372.19	2.31213	NA
68.9313	1.96742	78.7211	2.68498	NA
68.9329	2.25523	80.4502	3.04686	NA
68.9449	2.23212	111.873	2.88673	NA
68.9464	1.37936	774.98	3.07472	NA
68.9484	1.7424	93.5364	3.53881	NA
68.9686	1.27282	126.359	3.00863	NA
68.9706	1.72229	108.57	3.11007	NA
68.9731	1.87231	187.712	3.01652	NA
68.984	2.4052	117.276	3.44105	NA
68.991	2.06839	97.123	1.7269	NA
68.9975	1.66615	112.385	3.07404	NA
69.0345	1.34229	388.908	3.03747	NA
69.0418	1.73455	80.4482	1.99425	NA
69.0443	1.64853	174.103	5.38849	NA
69.0501	2.88782	207.767	2.73619	NA
69.0718	1.87425	288.095	3.53945	NA
69.0834	1.54508	1748.76	4.7051	NA
69.1211	2.32819	96.64	3.38892	NA
69.126	1.64528	230.863	2.52105	NA
69.1337	1.82483	81.7948	2.44597	NA
69.1902	2.35834	177.583	1.76104	NA
69.2244	1.89052	96.8414	2.89437	NA
69.2356	2.26777	82.6077	3.24518	NA
69.2731	1.97862	132.805	1.57804	NA
69.2778	1.51824	57.6164	2.4822	NA
69.2807	2.16392	87.6201	2.93209	NA
69.2827	2.22064	59.7617	3.45748	NA
69.2845	2.0716	176.071	2.26408	NA
69.3033	1.75231	81.5544	3.73799	NA
69.3078	2.26436	127.57	3.35898	NA
69.308	1.94325	62.3515	2.35069	NA
69.3191	2.02175	119.615	3.0331	NA
69.3219	1.92714	107.958	2.15923	NA
69.33	1.4514	346.952	2.01153	NA
69.3327	1.65533	112.529	2.95712	NA
69.3359	1.97737	206.571	1.6853	NA
69.3702	2.13526	92.5114	1.96059	NA
69.3742	2.68684	69.703	2.51898	NA
69.3841	2.11325	150.993	2.8112	NA
69.3886	1.65489	140.559	2.71943	NA
69.3891	1.65311	69.3136	2.91616	NA
69.3943	1.67257	165.106	2.87287	NA
69.4042	2.00093	65.1561	6.32406	NA
69.4089	1.7673	88.5352	1.74617	NA
69.4182	2.31166	123.75	1.65134	NA
69.4239	1.95355	108.717	3.03855	NA
69.4269	1.90343	60.7354	2.69766	NA
69.428	2.21118	53.201	2.97589	NA
69.4288	2.3458	67.5782	2.3137	NA
69.4565	2.21485	102.399	3.2881	NA
69.4826	1.8994	43.4385	2.98063	NA
69.4857	2.07279	371.928	2.13323	NA
69.4922	2.07448	99.7974	2.05499	NA
69.5218	2.28306	330.724	1.94073	NA
69.5404	1.27472	152.468	3.67806	NA
69.5635	2.18474	162.641	3.32718	NA
69.5686	1.95252	121.62	4.2793	NA
69.5803	1.87535	129.169	1.628	NA
69.6222	1.65723	93.0125	4.3614	NA
69.6332	1.97496	192.849	2.70516	NA
69.6352	1.90984	83.4006	2.84211	NA
69.6497	1.99936	62.9741	2.78654	NA
69.6537	2.11421	121.75	2.69525	NA
69.6557	2.08167	129.441	2.93291	NA
69.6742	1.87931	131.873	1.68845	NA
69.6822	2.36757	91.7061	1.84437	NA
69.688	1.86718	254.698	1.82582	NA
69.6924	2.36424	125.508	1.89611	NA
69.698	1.76114	79.2507	2.7678	NA
69.7002	2.21301	57.702	2.67995	NA
69.7108	2.17538	113.38	2.76294	NA
69.7115	2.00403	231.37	2.62314	NA
69.7191	2.79826	466.146	4.20725	NA
69.7248	2.45551	195.718	2.05024	NA
69.7256	1.88468	220.327	2.77689	NA
69.728	1.85341	85.1272	2.26735	NA
69.7312	1.40529	303.721	2.87062	NA
69.7372	1.93524	168.717	1.65362	NA
69.742	2.0947	229.048	2.88306	NA
69.7423	2.2682	101.254	1.90163	NA
69.75	2.29432	78.3031	2.03909	NA
69.7601	1.91694	77.5387	3.07679	NA
69.7613	1.93328	274.43	4.20261	NA
69.7642	1.64625	574.391	9.32373	NA
69.7653	1.64067	342.266	3.51839	NA
69.7705	1.74455	181.18	2.63228	NA
69.7913	2.12154	96.6834	1.83809	NA
69.8195	1.36379	93.8084	4.22319	NA
69.8302	2.1685	136.475	1.72443	NA
69.8454	1.83343	111.967	2.83394	NA
69.8494	2.14614	151.468	2.98356	NA
69.8541	1.84288	93.7878	2.14761	NA
69.8576	1.80142	146.486	3.22949	NA
69.8627	1.95297	98.5494	1.81277	NA
69.8638	2.05618	124.446	3.56912	NA
69.87	1.70417	227.439	2.81097	NA
69.8801	1.47748	108.304	2.53602	NA
69.8801	1.63073	161.269	2.67653	NA
69.8809	2.11609	118.377	3.91638	NA
69.9094	1.84867	155.428	3.04875	NA
69.9119	1.67982	316.732	5.06859	NA
69.917	1.85633	90.3853	2.65727	NA
69.9191	2.25473	201.82	3.06358	NA
69.92	2.27688	164.462	5.25587	NA
69.9298	2.19084	145.044	2.62744	NA
69.9316	1.65661	286.995	3.68937	NA
69.9341	1.68104	122.864	2.76165	NA
69.9405	1.68229	248.726	2.6429	NA
69.9503	1.93722	113.166	2.03299	NA
69.9553	1.9501	126.127	3.33653	NA
69.9603	1.7765	176.198	3.12227	NA
69.9633	2.02601	109.217	2.53028	NA
69.9776	1.78606	148.822	2.70327	NA
69.9817	1.63147	251.832	2.34165	NA
69.9859	1.90091	93.0468	2.41138	NA
69.9984	1.64196	210.473	3.28909	NA
70.0028	1.81216	90.2266	2.50153	NA
70.0034	1.75913	135.981	2.31102	NA
70.0105	1.73556	91.9373	2.54629	NA
70.0153	1.87619	81.3637	2.13316	NA
70.0276	2.11782	97.6339	3.60418	NA
70.0287	1.87096	317.619	1.81844	NA
70.0366	2.38123	120.503	1.7695	NA
70.0417	1.58858	148.491	1.93131	NA
70.0547	1.96527	103.203	2.94014	NA
70.0572	2.09033	130.362	2.42345	NA
70.0596	2.17764	158.815	2.95851	NA
70.0664	1.69669	76.9994	2.38342	NA
70.0685	1.89005	72.7735	2.16844	NA
70.0689	1.80007	130.503	3.88781	NA
70.0716	1.89301	102.812	2.71508	NA
70.0758	2.4012	29.8218	2.89751	NA
70.078	1.81429	63.5531	2.05923	NA
70.0921	1.89135	216.086	2.02676	NA
70.0948	1.86335	196.013	3.55506	NA
70.0951	2.29366	112.185	3.78018	NA
70.0995	2.07303	602.069	1.36611	NA
70.1094	1.55367	183.692	3.74931	NA
70.1193	1.75671	120.974	1.82367	NA
70.1241	1.78182	125.831	2.72648	NA
70.1249	1.88158	77.3237	4.63789	NA
70.1308	1.51492	106.423	4.12095	NA
70.1566	2.04957	75.7502	2.61262	NA
70.157	1.73081	97.0294	2.83412	NA
70.1626	2.78723	145.685	1.94243	NA
70.1689	1.82167	180.439	4.21278	NA
70.1691	1.84002	65.4755	2.84569	NA
70.171	2.55323	95.5002	1.98719	NA
70.1729	2.19114	155.967	1.73162	NA
70.1816	2.22217	178.827	4.38819	NA
70.1833	1.65517	154.682	3.91057	NA
70.1835	2.21098	59.0454	2.4118	NA
70.1942	2.36749	64.403	2.47617	NA
70.1971	2.2731	65.2742	2.95831	NA
70.2192	2.22487	91.0434	2.85465	NA
70.2249	2.29792	174.783	2.06215	NA
70.2346	1.37772	370.692	5.27443	NA
70.2491	2.20591	266.918	3.48766	NA
70.2507	1.83355	110.625	1.97705	NA
70.2581	1.18685	580.049	3.92445	NA
70.2777	1.58673	92.2668	2.90944	NA
70.28	1.91567	102.217	3.36198	NA
70.285	2.06671	101.161	2.55689	NA
70.2862	1.67389	105.691	3.17002	NA
70.3063	2.00855	65.955	2.50057	NA
70.3131	2.01344	86.7424	1.92856	NA
70.3146	1.61695	405.637	12.8522	NA
70.3168	2.04516	54.056	2.99903	NA
70.3237	2.03162	82.6434	2.78098	NA
70.3484	1.8405	60.9252	1.937	NA
70.3664	2.16929	112.326	1.98231	NA
70.3698	1.32898	249.019	2.48017	NA
70.3728	2.04736	50.0577	3.67847	NA
70.3885	3.01401	66.6429	2.5183	NA
70.3996	1.91398	85.654	1.76836	NA
70.4025	2.2819	98.6193	2.33139	NA
70.4034	1.79921	131.841	1.87412	NA
70.4125	2.14073	186.515	2.52923	NA
70.4166	1.74311	165.663	3.31388	NA
70.4528	1.6496	178.424	1.7708	NA
70.4594	2.05609	65.0888	2.56738	NA
70.474	1.85409	91.0557	2.43805	NA
70.4759	1.60504	108.892	2.87091	NA
70.4771	2.0893	44.6654	4.15397	NA
70.4779	1.44692	75.7982	2.76157	NA
70.479	1.77161	132.08	1.83862	NA
70.4805	1.95131	72.0494	2.62506	NA
70.4812	1.60489	110.25	1.61392	NA
70.483	2.29255	89.1343	1.62957	NA
70.4921	1.86177	170.849	2.92681	NA
70.4971	1.87588	89.5458	2.25788	NA
70.5005	2.25544	156.06	3.12679	NA
70.527	1.46012	112.231	1.70247	NA
70.5291	1.86788	111.48	2.70708	NA
70.5301	2.70457	99.8203	2.24149	NA
70.5324	1.64778	132.526	2.53115	NA
70.5442	1.72594	56.5615	2.78991	NA
70.5452	2.19378	55.3771	2.48836	NA
70.5629	2.13436	111.474	2.2348	NA
70.5785	1.84214	543.253	3.58591	NA
70.5883	1.70753	510.364	4.0189	NA
70.5922	1.36739	395.017	4.97327	NA
70.5946	1.6715	88.2084	2.25639	NA
70.5952	1.88741	116.008	1.739	NA
70.6045	2.27521	164.699	1.69489	NA
70.6233	1.766	94.1565	3.49594	NA
70.6314	1.64081	135.036	2.27277	NA
70.6392	2.0974	65.1732	2.36891	NA
70.6477	1.66712	267.971	2.95736	NA
70.661	1.97317	94.8042	2.66707	NA
70.6622	2.23457	91.787	2.79892	NA
70.6626	1.94439	54.3095	2.11174	NA
70.6663	1.91284	197.731	1.89792	NA
70.671	1.81636	371.106	3.29405	NA
70.6728	2.34678	79.4495	2.54996	NA
70.6738	1.45232	175.236	2.59494	NA
70.6753	2.0219	94.723	2.12775	NA
70.6754	1.7559	103.185	1.78135	NA
70.6756	1.30887	1270.36	3.84701	NA
70.6883	1.78878	100.637	3.57042	NA
70.6923	1.54664	51.091	3.67143	NA
70.6971	1.97224	129.6	1.69268	NA
70.702	1.90274	68.893	2.66883	NA
70.7069	1.85124	177.036	1.52738	NA
70.7107	2.08268	200.825	1.67542	NA
70.7248	1.60398	81.7667	2.34471	NA
70.737	2.20689	62.3646	2.73097	NA
70.7402	2.07862	155.671	2.18662	NA
70.7479	1.39412	212.403	3.02593	NA
70.7503	1.3824	137.336	3.59009	NA
70.755	2.05586	102.613	2.39105	NA
70.7696	1.88318	69.9836	2.59283	NA
70.7704	1.54436	226.536	4.64934	NA
70.7764	1.82551	152.036	2.71958	NA
70.7871	2.35283	75.6841	2.2011	NA
70.7881	1.95506	70.1224	2.30862	NA
70.7984	1.47868	100.598	1.98783	NA
70.8002	1.93125	77.9158	2.34274	NA
70.8052	2.10617	70.977	2.08686	NA
70.8059	1.8056	164.332	1.89423	NA
70.8062	2.11341	101.449	3.34845	NA
70.8087	2.12374	56.9273	2.94937	NA
70.8239	2.82662	55.5741	4.1737	NA
70.8303	2.16503	132.62	2.59381	NA
70.8308	1.88195	277.423	2.4747	NA
70.8404	1.47294	112.509	1.92751	NA
70.847	1.55841	522.257	3.62717	NA
70.8472	1.87086	112.645	2.30354	NA
70.8489	1.9132	400.605	1.96917	NA
70.8696	1.96565	376.793	2.48442	NA
70.872	1.75877	100.996	3.24595	NA
70.8753	1.71301	221.342	3.89654	NA
70.8767	2.17558	167.337	1.96386	NA
70.88	1.87508	138.152	1.65178	NA
70.8835	2.42178	118.341	2.86518	NA
70.8836	1.58327	97.2719	2.44956	NA
70.889	2.42637	108.238	1.76021	NA
70.8894	1.72555	79.8457	2.6667	NA
70.9013	1.74375	121.323	2.44603	NA
70.912	1.60063	171.62	4.5396	NA
70.9208	2.08934	216.732	4.25153	NA
70.9221	1.76646	244.306	2.51103	NA
70.9273	2.11922	103.502	3.67071	NA
70.9349	1.64731	132.022	1.88559	NA
70.9449	1.80405	1918.13	8.66801	NA
70.9498	2.04509	87.2746	2.23214	NA
70.9606	2.50054	65.134	2.76035	NA
70.9635	1.6184	576.514	4.01503	NA
70.9675	1.72281	189.374	2.59166	NA
70.9678	2.08262	184.146	1.76439	NA
70.9715	1.77584	213.224	2.96531	NA
70.9794	1.7409	122.087	2.55136	NA
70.9809	1.85714	72.7411	2.71498	NA
70.9826	1.84813	294.551	2.82001	NA
70.9883	1.89665	70.3628	2.86212	NA
70.992	2.13106	238.615	2.42444	NA
70.9924	1.95423	148.713	2.18991	NA
70.9978	2.02822	81.4609	2.66228	NA
70.9979	1.55342	244.474	4.307	NA
71.0079	1.70294	93.0499	3.18367	NA
71.008	1.65974	107.852	3.20122	NA
71.0167	1.19326	183.666	2.68728	NA
71.0363	1.37414	535.515	3.52695	NA
71.0396	1.88374	130.428	1.73281	NA
71.0397	2.05964	69.2862	2.41272	NA
71.0444	1.78293	145.817	3.12356	NA
71.0475	1.63022	197.224	3.68166	NA
71.0484	1.567	100.692	1.90983	NA
71.0552	2.10527	99.1942	2.90311	NA
71.0554	1.76812	55.2111	1.60068	NA
71.06	1.44411	104.094	3.39195	NA
71.0607	1.95215	90.0434	3.06359	NA
71.0612	1.29606	1612.18	3.14743	NA
71.0655	1.76318	101.582	2.20043	NA
71.0691	2.1624	106.131	1.98608	NA
71.0693	1.89022	220.471	3.88633	NA
71.0789	2.14069	130.724	1.78894	NA
71.0793	1.53614	223.797	2.12048	NA
71.0878	1.98079	263.613	2.31555	NA
71.0885	1.64477	186.115	2.57743	NA
71.0896	1.58102	81.8318	2.47968	NA
71.0913	2.18234	187.6	2.47699	NA
71.1002	2.11302	143.668	1.97431	NA
71.1015	1.91385	82.5996	2.09201	NA
71.1043	1.87227	101.195	1.86629	NA
71.1091	1.79832	911.704	3.86191	NA
71.1098	1.48567	915.175	4.45064	NA
71.1143	1.82734	96.5562	1.92139	NA
71.1158	2.02714	83.2382	2.73276	NA
71.1159	1.81447	148.546	3.04466	NA
71.1179	1.92813	265.947	2.35166	NA
71.1223	2.12269	156.768	2.72406	NA
71.1225	1.64352	100.057	2.23305	NA
71.1246	1.43032	63.3036	2.6792	NA
71.1338	1.5047	1370.19	2.22771	NA
71.1361	2.20108	78.521	1.86	NA
71.1578	1.90782	124.992	2.13173	NA
71.1628	2.58657	81.419	2.31693	NA
71.1644	1.85169	59.555	3.43058	NA
71.1721	1.73849	42.4948	1.68427	NA
71.1726	1.67771	197.495	2.02034	NA
71.173	2.49502	971.834	3.18268	NA
71.1738	1.54423	199.341	2.10278	NA
71.175	3.00485	92.2026	2.40661	NA
71.177	2.14024	141.416	2.75147	NA
71.179	2.03276	67.7027	3.62503	NA
71.1861	2.14215	194.822	4.16166	NA
71.1875	2.3984	103.747	1.63979	NA
71.1888	1.87658	269.936	2.1353	NA
71.189	1.90192	1033.64	9.92062	NA
71.1929	1.7053	190.925	2.82952	NA
71.2079	2.27939	477.99	2.33215	NA
71.209	2.3712	93.0385	1.76857	NA
71.2093	1.5078	198.182	2.13319	NA
71.213	2.44685	133.628	1.96554	NA
71.2157	1.86787	123.338	1.73272	NA
71.2219	1.34157	210.569	2.94771	NA
71.2299	1.64123	140.133	2.9908	NA
71.2307	1.8441	91.3354	2.25443	NA
71.2351	1.74229	93.2803	2.55025	NA
71.2378	1.55905	424.233	4.68317	NA
71.2438	2.24897	141.838	1.80676	NA
71.2494	1.58287	82.9632	2.43964	NA
71.2547	1.95767	87.2645	1.84612	NA
71.256	1.97993	108.534	4.36791	NA
71.256	1.88071	65.6702	2.59099	NA
71.2673	1.57298	81.9974	2.9179	NA
71.2744	1.89678	99.9434	2.57969	NA
71.2749	1.84146	128.789	2.11012	NA
71.2771	1.63822	157.974	2.40701	NA
71.2787	1.47837	108.07	3.36131	NA
71.281	2.41742	138.193	2.33819	NA
71.2854	1.99448	166.516	2.07392	NA
71.2921	1.85032	68.5208	2.52255	NA
71.2923	1.89602	595.944	3.94399	NA
71.2936	2.1755	71.3345	2.55191	NA
71.294	1.71546	56.6599	2.46476	NA
71.2958	1.58336	72.9104	2.24448	NA
71.3111	1.95026	76.8051	2.72101	NA
71.3139	1.61947	88.1606	2.30493	NA
71.332	2.65484	183.805	3.1598	NA
71.3495	1.68537	61.3562	5.1129	NA
71.3495	2.119	110.145	2.10449	NA
71.3535	2.04249	106.415	2.95598	NA
71.356	1.79856	80.9902	5.47053	NA
71.3564	2.07185	98.6508	1.75604	NA
71.3606	2.12712	281.397	2.421	NA
71.3607	1.57818	66.4009	1.87362	NA
71.3616	1.76081	345.832	2.54749	NA
71.3664	1.62852	232.244	3.40514	NA
71.3668	2.17394	72.0157	3.25199	NA
71.384	2.11043	297.676	2.21411	NA
71.3853	1.54301	72.069	2.67431	NA
71.3887	1.86471	89.0337	3.71295	NA
71.3887	2.26397	148.037	2.77891	NA
71.3894	1.82479	59.0433	2.69249	NA
71.3898	1.57696	277.133	2.88961	NA
71.3913	1.59215	41.3112	2.51351	NA
71.3941	1.73421	158.169	1.91236	NA
71.3971	1.62733	106.152	2.08408	NA
71.4026	1.4136	505.191	3.15324	NA
71.4056	2.24828	137.573	1.30957	NA
71.4086	1.53336	106.608	2.432	NA
71.4139	1.6813	119.6	3.39173	NA
71.4169	2.1278	116.056	3.03851	NA
71.4192	2.09152	122.338	2.39327	NA
71.4207	1.64597	59.8884	3.22563	NA
71.4212	1.86502	93.7773	3.51204	NA
71.4282	1.88348	167.466	2.66076	NA
71.4317	2.10534	56.3446	2.7071	NA
71.4362	1.9658	434.085	4.02136	NA
71.444	1.82197	206.64	1.79481	NA
71.4451	1.79069	63.2313	1.9624	NA
71.4453	1.9514	78.2164	2.9132	NA
71.4551	1.88873	82.3595	1.9312	NA
71.4693	2.47456	517.979	6.00326	NA
71.4742	1.6109	548.405	4.4747	NA
71.481	1.98214	75.4397	2.72945	NA
71.4814	1.93304	84.5418	2.29764	NA
71.4843	1.71064	1047.35	3.0027	NA
71.4872	1.75044	318.117	1.86272	NA
71.4929	2.64343	104.698	2.25126	NA
71.4938	1.5072	126.827	2.3063	NA
71.4969	1.93361	245.838	3.86751	NA
71.4979	2.20281	91.9768	2.69324	NA
71.5007	1.82847	160.83	2.85568	NA
71.501	2.25385	71.8653	2.40359	NA
71.503	1.52213	218.784	3.03907	NA
71.5038	2.22602	161.781	2.67075	NA
71.511	1.96152	57.3231	2.12448	NA
71.5139	1.7239	76.8036	2.04215	NA
71.5155	2.27111	78.4069	3.783	NA
71.516	2.25595	70.5645	2.27273	NA
71.5178	2.33443	120.58	1.64531	NA
71.5218	1.77887	597.252	4.08108	NA
71.5294	1.54518	218.64	2.42037	NA
71.5337	1.97275	128.878	2.90418	NA
71.5346	2.14165	51.2828	2.86231	NA
71.5401	1.68908	93.195	2.10266	NA
71.5419	2.04259	91.3369	2.45349	NA
71.5424	2.00514	99.188	3.25236	NA
71.5442	2.04883	78.4426	2.78179	NA
71.5445	1.87241	101.056	2.97998	NA
71.5457	1.5749	136.727	1.95878	NA
71.5461	2.13467	148.549	3.49059	NA
71.5479	2.38263	263.548	1.99574	NA
71.5503	1.93543	218.756	1.43663	NA
71.5504	1.67077	162.268	1.68423	NA
71.5526	1.99747	119.763	2.12062	NA
71.5582	1.46915	344.379	2.65382	NA
71.5589	1.76995	344.044	2.0888	NA
71.5701	1.95599	139.099	3.14723	NA
71.5727	2.38171	70.7076	3.37236	NA
71.5747	1.87229	62.1265	2.65869	NA
71.5767	1.48475	1875.82	4.94373	NA
71.5775	2.4847	50.8889	3.2253	NA
71.5776	1.76434	94.8319	2.15345	NA
71.5828	2.07595	132.189	3.10621	NA
71.5849	2.04116	82.5494	1.80506	NA
71.5854	2.28198	133.204	2.48897	NA
71.587	1.94974	129.264	1.8455	NA
71.5917	2.1106	68.1598	2.96561	NA
71.5924	1.67102	172.266	1.92847	NA
71.5983	2.16641	73.2248	2.58347	NA
71.6026	1.48927	192.855	2.05648	NA
71.6066	2.22261	55.4574	3.14933	NA
71.6072	2.24373	63.6786	3.10621	NA
71.6145	2.0296	116.97	3.52116	NA
71.6192	1.96065	133.492	1.8192	NA
71.6208	1.53235	118.149	2.575	NA
71.6234	2.45357	62.1166	2.38836	NA
71.6256	1.62684	1752.99	2.99585	NA
71.6311	1.56815	103.027	2.20176	NA
71.6339	1.99752	78.2964	2.62998	NA
71.6341	1.34988	559.95	4.10058	NA
71.6365	1.82111	96.4295	2.64503	NA
71.6388	1.60073	121.868	2.73408	NA
71.6519	1.75447	103.38	2.65751	NA
71.6583	1.7738	1053.38	2.8138	NA
71.6706	1.97791	80.9437	2.81148	NA
71.6727	1.80982	58.8819	3.0062	NA
71.6774	2.42365	64.6103	2.24096	NA
71.6787	1.47946	1034.23	5.09229	NA
71.6849	1.36198	306.39	2.27224	NA
71.6914	1.85637	81.3975	2.37196	NA
71.6936	1.95608	187.831	3.42486	NA
71.6954	2.08553	173.171	1.9301	NA
71.696	1.74038	537.432	3.59738	NA
71.7028	2.39637	105.022	2.44837	NA
71.7063	1.45439	125.225	3.03234	NA
71.7067	1.78958	154.751	4.82401	NA
71.7143	1.9924	342.137	2.20164	NA
71.7201	1.95361	84.122	3.1918	NA
71.7243	1.69454	426.772	3.11116	NA
71.7283	1.55789	48.1263	2.42858	NA
71.7412	1.85546	97.2754	3.43891	NA
71.7454	1.83418	145.302	2.10656	NA
71.7487	2.35749	109.753	1.90429	NA
71.7493	1.71573	226.721	1.89673	NA
71.7634	1.94834	97.6097	2.26468	NA
71.764	1.78287	180.888	1.89271	NA
71.7646	1.55973	119.003	3.51224	NA
71.771	1.72986	280.437	2.92206	NA
71.7711	1.75984	106.489	2.62264	NA
71.7734	1.5924	100.482	2.49754	NA
71.7823	1.44134	157.384	4.27046	NA
71.7838	1.6363	124.43	3.75591	NA
71.7943	2.33811	149.308	2.7562	NA
71.7948	2.33341	131.337	9.25945	NA
71.8019	1.83597	110.965	3.42792	NA
71.8063	1.67342	149.649	4.63147	NA
71.811	1.75348	48.7344	2.54846	NA
71.8118	1.81564	123.649	3.28317	NA
71.8179	1.37201	195.742	2.64502	NA
71.8179	1.48331	1946.76	4.61035	NA
71.8238	2.13467	172.632	2.43554	NA
71.826	1.85938	125.119	2.69424	NA
71.8275	1.55174	122.141	3.80751	NA
71.8276	1.35706	136.417	1.76507	NA
71.8316	1.66587	122.642	2.50147	NA
71.8396	2.02064	90.5533	2.29964	NA
71.8442	2.01335	153.824	2.54392	NA
71.8479	2.35397	255.373	4.77876	NA
71.8555	2.05845	47.3376	3.22357	NA
71.863	1.75346	122.388	2.73378	NA
71.872	1.86748	87.779	2.9253	NA
71.8725	1.96628	68.0513	2.06651	NA
71.8756	2.1241	237.257	4.39815	NA
71.8774	1.64114	454.888	6.30466	NA
71.8889	1.19429	140.118	5.04511	NA
71.894	1.86639	108.799	2.83036	NA
71.9001	2.15253	72.3567	2.14379	NA
71.9008	1.87176	191.695	1.80105	NA
71.901	2.17513	138.264	2.16465	NA
71.9082	1.6046	220.195	1.77449	NA
71.9106	1.64853	223.451	2.77124	NA
71.9127	2.32424	68.8248	3.16558	NA
71.913	2.36895	64.8476	2.62799	NA
71.9168	1.93019	81.689	2.80059	NA
71.928	2.47731	175.005	2.76253	NA
71.9289	1.96739	124.954	2.01395	NA
71.9313	1.67269	199.448	2.65083	NA
71.9357	1.69306	90.7598	2.81124	NA
71.9394	1.51751	224.859	2.52233	NA
71.9412	1.92151	92.3503	2.10369	NA
71.9431	1.90662	260.548	4.56315	NA
71.958	1.32942	139.382	2.81643	NA
71.9638	1.86378	224.958	1.99615	NA
71.9648	1.87895	130.839	2.36739	NA
71.9729	2.34144	141.141	1.88127	NA
71.9733	1.69826	163.136	2.03462	NA
71.9738	1.58881	346.861	2.91753	NA
71.9765	1.95182	114.932	2.29312	NA
71.9858	2.0594	88.7548	1.878	NA
71.9926	1.10259	125.957	3.66211	NA
71.9957	2.02224	44.8293	2.20173	NA
72.0017	2.57034	103.365	2.01285	NA
72.0125	1.52322	180.566	2.40257	NA
72.0126	1.76265	188.861	2.5899	NA
72.017	1.96264	67.5306	1.80621	NA
72.0205	2.39967	192.977	2.03713	NA
72.0209	1.82071	113.057	2.22104	NA
72.0213	1.48683	143.777	2.09216	NA
72.0262	2.03597	118.452	1.68429	NA
72.0303	2.31066	54.5893	2.67422	NA
72.0342	2.26387	294.501	2.31126	NA
72.0421	2.01074	109.426	2.79524	NA
72.0458	2.29809	101.614	2.54972	NA
72.0467	2.42208	99.9808	4.56064	NA
72.0604	2.24649	106.181	3.03374	NA
72.0604	1.56379	144.647	3.63321	NA
72.0612	2.06146	104.575	1.76775	NA
72.0774	1.52045	142.197	3.10449	NA
72.0837	2.24141	80.0797	2.06498	NA
72.0862	2.35444	86.1343	2.3095	NA
72.0878	1.92602	81.2148	2.4427	NA
72.0949	2.01325	59.4517	2.56673	NA
72.0949	1.34168	124.288	2.10382	NA
72.0994	2.16126	110.438	2.89752	NA
72.1024	2.31148	126.961	3.57488	NA
72.1032	1.41576	85.702	2.0413	NA
72.1084	2.17964	119.392	1.70766	NA
72.1094	1.83389	45.2044	2.76026	NA
72.1142	2.33974	61.6756	2.6942	NA
72.1152	1.68668	147.2	1.73123	NA
72.1159	2.09974	182.161	1.88892	NA
72.1169	1.65416	241.159	3.43359	NA
72.1172	1.7306	98.7224	3.01536	NA
72.1201	1.65546	166.606	1.9335	NA
72.1245	1.94355	150.158	2.90759	NA
72.1291	1.4423	89.5866	1.96868	NA
72.1339	1.97594	84.3519	3.21188	NA
72.1361	1.53873	92.4844	3.60063	NA
72.1375	2.2419	44.0793	2.03921	NA
72.1394	2.00858	65.4451	2.67182	NA
72.1407	1.87065	78.9553	1.85132	NA
72.1461	2.33621	75.0823	3.20528	NA
72.1508	2.14596	130.431	2.75766	NA
72.1548	2.17785	65.1708	2.69908	NA
72.1579	1.60797	608.38	3.6137	NA
72.1693	1.78065	96.333	2.18718	NA
72.175	2.02506	144.736	1.80154	NA
72.1831	1.56804	199.276	3.02814	NA
72.1891	2.38119	172.341	2.54168	NA
72.203	2.00111	114.381	3.61829	NA
72.205	2.05007	166.716	2.01599	NA
72.2061	2.02291	124.114	2.56849	NA
72.2128	2.08464	82.0715	1.86481	NA
72.2144	1.57726	76.1477	2.64539	NA
72.2164	1.80028	77.2573	2.23179	NA
72.2211	1.13207	632.865	1.98818	NA
72.2241	1.59687	94.9913	2.27005	NA
72.2252	2.24015	77.1677	3.23999	NA
72.2255	2.06484	75.2717	1.88938	NA
72.2287	2.13418	115.255	1.94511	NA
72.2289	2.01212	134.355	1.68096	NA
72.2305	1.61756	153.393	2.74423	NA
72.2366	2.16006	83.0417	2.95477	NA
72.2436	1.54543	209.603	3.27698	NA
72.2481	2.13507	107.602	2.33609	NA
72.2552	1.90381	125.736	2.66205	NA
72.2614	1.2439	103.161	1.86645	NA
72.2642	1.4341	440.126	5.12722	NA
72.2664	1.40998	236.224	2.96116	NA
72.2691	1.38403	827.576	4.34589	NA
72.2716	1.84251	154.339	3.41913	NA
72.2717	1.57456	333.793	3.52658	NA
72.2757	1.82376	668.351	4.25829	NA
72.2782	1.94886	110.861	2.31079	NA
72.2802	2.00227	177.565	3.11496	NA
72.2808	1.75089	180.262	3.61188	NA
72.2826	2.10453	288.181	1.97572	NA
72.2885	2.1913	108.459	2.28064	NA
72.2905	1.86093	223.417	2.47825	NA
72.2913	1.59365	106.421	2.49172	NA
72.2963	1.64986	146.198	2.7937	NA
72.2965	1.90837	135.725	1.6024	NA
72.3014	2.01473	61.7881	3.40032	NA
72.3041	1.58636	60.569	2.7553	NA
72.3048	1.12503	822.719	4.30409	NA
72.3122	2.32441	97.2172	2.75158	NA
72.317	2.41628	125.962	2.54984	NA
72.319	1.96637	429.489	6.23069	NA
72.3194	2.24914	155.464	1.7119	NA
72.3205	2.15222	183.348	3.18033	NA
72.3238	2.99006	60.5967	2.44471	NA
72.3247	1.60047	114.532	1.74269	NA
72.3249	1.51262	597.98	6.96645	NA
72.3252	2.14783	495.14	4.3738	NA
72.3259	1.51711	459.181	2.08221	NA
72.3313	2.14175	92.5214	2.87372	NA
72.3322	1.89159	53.0203	2.39745	NA
72.3328	1.68667	181.127	2.86913	NA
72.3334	1.82837	281.527	4.788	NA
72.3369	1.97017	218.613	6.40391	NA
72.3376	1.65017	65.2192	2.91731	NA
72.34	2.53676	70.5602	2.61633	NA
72.3401	1.78018	145.625	2.32394	NA
72.3494	2.13376	291.609	2.22817	NA
72.3523	2.06632	108.365	1.47855	NA
72.3602	2.09247	91.7315	3.59544	NA
72.3622	2.21802	350.699	2.42756	NA
72.3696	1.60486	179.087	2.68731	NA
72.3743	1.79877	92.9583	2.26084	NA
72.3749	2.1584	119.008	2.19759	NA
72.377	1.99832	82.8345	2.72653	NA
72.3787	1.76318	86.5621	2.4385	NA
72.3876	1.4012	236.143	3.3784	NA
72.3877	2.0015	239.302	2.88811	NA
72.3895	2.10987	725.609	3.82662	NA
72.3896	1.75676	81.2607	1.87103	NA
72.3897	2.32942	204.527	3.30965	NA
72.3898	2.06015	75.464	2.98494	NA
72.3933	1.84444	93.7212	2.06013	NA
72.3967	2.00083	59.7133	2.55021	NA
72.4	1.81722	163.054	3.23409	NA
72.401	2.3583	74.5265	2.78475	NA
72.4042	2.21953	148.548	1.66154	NA
72.4048	2.28706	125.272	1.89955	NA
72.4079	1.53782	116.134	2.38437	NA
72.4137	2.29326	47.1096	3.15177	NA
72.414	1.73085	197.624	2.58826	NA
72.4207	1.64911	155.544	2.70819	NA
72.4237	1.86262	228.681	2.5592	NA
72.4243	1.70245	159.668	4.27655	NA
72.4256	1.6656	111.654	1.79369	NA
72.4367	2.12059	111.576	2.0187	NA
72.4448	1.82301	178.255	2.69828	NA
72.4505	1.75031	243.972	3.4071	NA
72.4511	2.5669	164.853	2.46598	NA
72.4568	1.83131	89.1454	2.23761	NA
72.4641	2.41812	574.214	3.74634	NA
72.468	1.67895	203.611	4.26977	NA
72.4746	2.53848	129.675	2.86393	NA
72.4763	1.70487	72.1532	2.88719	NA
72.4802	2.03469	87.0926	3.65234	NA
72.485	2.03898	436.106	3.73991	NA
72.4954	1.94209	64.6565	2.02892	NA
72.4988	2.07465	118.769	2.77811	NA
72.5008	2.19397	63.3076	2.77243	NA
72.5009	1.78704	642.386	2.78507	NA
72.5042	1.72138	159.599	1.78806	NA
72.5079	2.09677	106.946	3.39907	NA
72.5082	1.62358	161.862	2.23148	NA
72.5089	1.83247	58.1102	1.64803	NA
72.5144	2.18391	109.582	3.17179	NA
72.5281	2.23785	132.451	1.75085	NA
72.5285	1.43496	80.4629	1.84112	NA
72.5301	2.53142	74.6949	2.89307	NA
72.531	1.80317	151.493	2.43178	NA
72.5391	1.7736	150.057	1.79694	NA
72.5395	1.71992	204.41	2.84194	NA
72.543	1.55967	213.384	2.15676	NA
72.5446	2.10119	135.661	2.2685	NA
72.55	1.9441	164.53	2.71033	NA
72.5508	1.67789	182.675	2.00457	NA
72.551	1.45553	141.093	3.2167	NA
72.552	2.03596	57.1108	2.40166	NA
72.5542	1.8917	44.3444	2.13561	NA
72.5603	2.04186	189.043	3.26544	NA
72.5609	1.85269	95.527	2.40485	NA
72.5683	2.10187	140.039	3.49384	NA
72.5698	2.01458	138.722	1.50945	NA
72.5711	2.01017	169.037	1.75225	NA
72.5714	1.82955	150.715	2.29604	NA
72.5753	1.38857	182.296	2.32222	NA
72.5783	2.38496	138.344	1.89971	NA
72.5852	1.92213	129.46	3.50365	NA
72.5877	1.87072	97.0453	3.23262	NA
72.5925	1.73589	52.8204	3.01876	NA
72.5975	2.08882	135.059	2.5272	NA
72.5985	1.78302	148.094	3.32594	NA
72.6008	1.98541	361.21	2.09766	NA
72.6034	1.4428	57.4683	2.10895	NA
72.6037	1.92745	142.319	3.37448	NA
72.6055	2.77114	107.631	2.45587	NA
72.6081	1.69916	134.418	6.51897	NA
72.6082	2.12255	83.8972	2.45119	NA
72.6151	1.73236	94.0681	1.96391	NA
72.616	1.6344	125.922	2.60208	NA
72.6166	1.9905	101.859	2.08511	NA
72.62	2.03264	116.336	1.57074	NA
72.6224	1.66343	172.411	1.65998	NA
72.6276	1.85829	273.793	2.69767	NA
72.6287	1.85263	353.606	3.44137	NA
72.6297	2.21742	34.7897	3.39476	NA
72.6327	1.97483	188.543	2.40117	NA
72.6332	1.98623	123.256	3.75978	NA
72.6409	2.16206	78.3554	2.94118	NA
72.6422	2.04874	116.574	1.71865	NA
72.6443	1.85636	68.4995	3.03083	NA
72.6455	2.15163	64.1863	2.92753	NA
72.6495	1.78979	135.539	4.41641	NA
72.6548	2.09831	124.228	2.01552	NA
72.6553	1.74655	114.519	2.12318	NA
72.6559	1.81953	152.949	3.03775	NA
72.6592	1.7797	113.066	1.97347	NA
72.66	2.19751	162.326	2.8731	NA
72.6603	1.72814	88.1677	3.0829	NA
72.6605	1.18313	259.363	2.4698	NA
72.6655	1.61565	61.3671	2.43704	NA
72.6659	2.06049	104.339	3.02763	NA
72.6671	1.58757	119.001	2.94358	NA
72.6681	2.20284	84.4415	3.31659	NA
72.6715	1.57546	114.961	2.2456	NA
72.673	1.8984	105.391	2.09233	NA
72.6802	2.31242	153.281	2.46164	NA
72.6886	1.87452	60.0781	2.89692	NA
72.6972	2.22514	79.6261	2.66774	NA
72.7074	1.6161	77.4165	2.22601	NA
72.7119	2.26972	87.9545	2.15226	NA
72.7149	1.43577	1344.97	8.21075	NA
72.7159	1.83502	114.637	2.09072	NA
72.7174	1.73356	135.905	1.86815	NA
72.7211	2.02547	99.4061	2.2512	NA
72.7213	2.07211	119.414	1.67207	NA
72.7226	2.1087	52.8095	2.39022	NA
72.7249	2.54864	105.959	3.35648	NA
72.7271	2.18996	310.662	2.62573	NA
72.7275	2.12383	161.862	4.55524	NA
72.7358	1.50453	123.94	1.52866	NA
72.737	1.9804	58.4004	2.19501	NA
72.7392	1.85809	203.808	2.119	NA
72.7437	1.93372	136.848	1.73532	NA
72.7457	2.14334	179.251	2.36024	NA
72.7478	1.79821	111.056	1.81998	NA
72.7491	1.66138	207.162	2.95885	NA
72.752	1.74606	213.025	2.96501	NA
72.7567	2.06529	293.572	2.49166	NA
72.7597	1.54992	255.068	2.67201	NA
72.764	1.71362	63.2455	3.23237	NA
72.7655	1.56671	164.703	2.22423	NA
72.7721	2.08116	278.059	7.90117	NA
72.7843	1.89956	267.451	2.84609	NA
72.7877	2.06878	112.136	1.66835	NA
72.7922	1.90721	45.0799	2.58711	NA
72.7938	1.91548	103.808	3.45813	NA
72.7941	1.75467	101.744	1.75534	NA
72.7951	1.90869	129.321	1.79156	NA
72.7963	1.67847	97.8914	1.64807	NA
72.8009	1.6158	143.895	2.18527	NA
72.8011	2.07621	83.3799	1.96407	NA
72.8036	1.89853	173.882	1.69719	NA
72.8067	2.27697	62.857	3.41049	NA
72.8092	2.26974	101.522	1.7898	NA
72.8146	2.17072	113.983	1.67184	NA
72.8163	1.71891	145.33	3.44368	NA
72.8179	1.72005	100.806	1.69915	NA
72.8196	1.75799	466.791	4.57844	NA
72.8203	1.92348	87.8586	2.06193	NA
72.8266	1.68694	85.9601	2.05455	NA
72.8307	2.08237	115.405	1.99959	NA
72.8325	1.67727	255.686	2.50805	NA
72.8348	1.52897	144.007	1.75626	NA
72.8429	2.08186	237.615	3.34763	NA
72.8459	1.64576	106.65	2.77919	NA
72.849	1.75556	150.148	3.98062	NA
72.8538	1.54105	85.6023	2.10277	NA
72.8556	2.10875	62.2874	3.34929	NA
72.857	1.57054	702.785	6.38693	NA
72.863	2.07775	57.06	2.76739	NA
72.8642	1.64506	143.453	1.91515	NA
72.8654	1.59246	474.176	3.36456	NA
72.8672	2.23734	119.878	1.59789	NA
72.8711	1.90082	147.079	2.97598	NA
72.8725	1.765	187.449	3.71008	NA
72.8739	1.39411	76.0218	1.89261	NA
72.8756	2.31777	185.915	2.5349	NA
72.8831	1.99878	117.529	2.52921	NA
72.8834	2.00289	44.1583	1.78934	NA
72.8869	1.74162	64.1021	2.29373	NA
72.893	1.712	432.677	2.27372	NA
72.8947	3.0382	1119.63	9.91427	NA
72.8957	2.39407	202.773	3.99373	NA
72.8965	1.15964	112.552	1.56595	NA
72.899	2.09281	311.905	2.04118	NA
72.9113	1.40239	506.484	41.7183	NA
72.9126	1.96584	56.1172	1.63509	NA
72.9155	1.98064	48.7027	2.72505	NA
72.9162	2.04827	39.1031	2.64549	NA
72.9249	2.22868	138.157	2.00231	NA
72.9326	2.05808	69.3148	2.43894	NA
72.9411	2.11666	175.007	1.61963	NA
72.9424	2.41633	100.858	1.97123	NA
72.9502	1.69253	140.304	1.6947	NA
72.953	2.03309	88.9208	1.71852	NA
72.9589	2.14849	127.618	3.8759	NA
72.9591	1.54774	598.011	3.54664	NA
72.9603	1.68243	403.699	3.75169	NA
72.9676	2.03527	107.263	1.65566	NA
72.9698	1.7756	272.855	2.27661	NA
72.9726	1.45849	143.167	2.12262	NA
72.9728	1.50774	284.957	2.94852	NA
72.9737	1.67876	122.162	3.47459	NA
72.9748	1.73725	211.037	1.86091	NA
72.9751	1.99068	115.578	2.55379	NA
72.9751	1.96722	96.751	1.8684	NA
72.9767	1.97701	82.0772	2.30136	NA
72.9768	2.16987	144.384	1.72827	NA
72.9768	1.75235	104.183	2.89284	NA
72.9797	1.51842	216.504	2.99549	NA
72.9832	1.77262	82.5428	2.21644	NA
72.9847	1.70638	154.505	2.68813	NA
72.9853	1.70216	109.519	2.06788	NA
72.9871	2.35239	102.393	3.3653	NA
72.9884	1.92058	69.8293	1.85485	NA
72.9898	1.75693	179.785	3.82943	NA
72.99	1.89569	133.903	3.09209	NA
72.9946	2.05074	130.417	1.679	NA
72.9964	1.62475	165.894	3.69512	NA
72.9967	1.57402	615.738	1.34081	NA
72.9984	1.76527	110.794	2.62199	NA
73.0043	1.72222	77.7933	3.07461	NA
73.0107	1.58083	91.2499	2.18438	NA
73.013	2.30188	203.379	1.58212	NA
73.0138	1.77507	89.6446	2.38823	NA
73.0231	1.54462	163.326	4.40935	NA
73.0288	1.71012	284.84	3.0139	NA
73.0327	1.92132	82.8023	2.46558	NA
73.0328	1.96798	87.4891	2.53939	NA
73.0367	2.42876	85.7051	3.25838	NA
73.0419	1.66955	539.988	2.56486	NA
73.0479	1.79705	121.119	1.70475	NA
73.0511	1.99639	122.415	1.78555	NA
73.0589	1.61614	107.934	2.4613	NA
73.0601	1.69938	112.619	2.49264	NA
73.065	2.05199	145.997	1.87839	NA
73.0673	1.50307	54.5766	3.88125	NA
73.0687	2.10947	313.154	2.63129	NA
73.0705	2.07627	147.348	3.50932	NA
73.0708	1.73449	940.523	8.73564	NA
73.0723	1.97794	49.2622	1.97339	NA
73.076	1.91315	190.094	3.12559	NA
73.0782	2.21869	65.2961	2.41583	NA
73.0785	2.14851	152.319	2.09165	NA
73.0814	2.49316	168.487	1.9511	NA
73.0884	2.29645	70.0027	3.26943	NA
73.0904	2.07062	125.779	1.82089	NA
73.0909	1.87223	93.445	2.4052	NA
73.0965	1.77465	124.866	1.76199	NA
73.0989	2.09695	336.313	2.54316	NA
73.1013	1.57771	161.648	1.55366	NA
73.1061	2.1068	345.687	3.12791	NA
73.1086	1.53685	1133.73	4.32466	NA
73.1088	1.41383	108.981	3.43868	NA
73.1091	1.99874	194.404	2.02287	NA
73.1117	1.35334	149.911	2.61704	NA
73.1201	2.14442	236.047	2.55695	NA
73.1257	2.03286	79.1319	2.21209	NA
73.1289	1.47637	82.188	1.91302	NA
73.1297	1.65306	179.673	3.48492	NA
73.1311	1.83536	87.8232	1.73348	NA
73.1358	1.90857	110.478	3.85231	NA
73.141	1.82921	114.898	1.83472	NA
73.1496	1.97813	129.642	1.9823	NA
73.151	1.61795	152.283	3.20392	NA
73.1544	2.14987	153.184	2.73794	NA
73.1603	1.53985	148.894	1.74424	NA
73.162	1.87106	73.3838	1.49399	NA
73.1636	1.9378	144.706	2.51462	NA
73.1658	2.09531	99.4292	2.23411	NA
73.1682	2.30333	321.79	4.05856	NA
73.1692	2.20693	141.832	1.81148	NA
73.1695	2.41424	151.169	1.88065	NA
73.1702	3.04571	729.898	0.942778	NA
73.1706	1.85233	249.623	4.40137	NA
73.1737	1.4896	133.083	1.81223	NA
73.177	1.89221	284.692	1.90168	NA
73.1776	1.91877	125.503	1.75399	NA
73.1789	2.43876	61.5874	2.60594	NA
73.1829	1.95494	315.481	1.73149	NA
73.1856	2.13977	66.2775	2.18487	NA
73.1902	2.10116	104.41	2.10731	NA
73.1919	1.71922	200.413	3.46949	NA
73.2064	1.75176	170.502	3.41901	NA
73.2072	1.88665	103.558	2.21683	NA
73.208	2.52365	81.4121	1.95188	NA
73.2129	1.94186	123.878	1.75068	NA
73.2176	1.4277	300.644	1.7082	NA
73.2187	1.98044	386.829	1.93317	NA
73.2191	1.82853	87.997	2.27892	NA
73.2222	1.93849	154.213	1.71886	NA
73.2315	1.80918	64.8137	1.79804	NA
73.2333	1.81893	70.0297	1.76801	NA
73.2348	2.29903	147.458	1.73405	NA
73.2434	1.9545	86.6999	2.66048	NA
73.2457	1.32479	139.479	2.26562	NA
73.2469	1.9734	223.562	2.20259	NA
73.2476	1.76066	157.526	2.98858	NA
73.2513	1.89264	186.296	1.80276	NA
73.2514	1.95444	78.451	1.81223	NA
73.2517	1.56802	106.115	2.45837	NA
73.2522	1.45641	208.057	1.68092	NA
73.2542	2.0013	106.125	3.34744	NA
73.2558	2.13077	49.1899	3.23263	NA
73.2578	1.67981	141.652	1.7427	NA
73.2588	2.75193	235.949	1.87408	NA
73.2592	1.7191	225.121	1.64194	NA
73.2707	1.69257	93.4024	4.15123	NA
73.2715	1.94464	196.417	1.85688	NA
73.2732	2.06373	96.4323	2.33915	NA
73.2739	2.58592	54.9736	1.58741	NA
73.2766	1.82487	164.117	1.56075	NA
73.2809	1.90775	288.341	2.78684	NA
73.289	2.28762	47.8249	2.19917	NA
73.293	2.30784	96.9114	3.00631	NA
73.2939	1.70662	283.923	2.7819	NA
73.2983	2.31861	302.885	3.37191	NA
73.2984	1.74538	106.033	2.03215	NA
73.2997	2.20619	133.693	1.87444	NA
73.3042	2.05084	89.7636	2.61169	NA
73.3045	1.66393	141.915	1.8373	NA
73.3087	1.91254	115.087	1.63037	NA
73.3156	1.87047	168.976	2.34675	NA
73.3162	2.27661	58.021	1.63471	NA
73.3168	2.20272	68.1768	2.72053	NA
73.3186	1.56245	67.1346	3.18854	NA
73.3226	2.37256	289.641	3.42383	NA
73.327	2.31597	241.267	2.77849	NA
73.3271	2.38779	37.9194	2.47937	NA
73.33	1.88302	160.171	2.73915	NA
73.3311	3.14326	91.2834	2.73729	NA
73.3348	1.98726	178.551	2.52737	NA
73.3362	1.51182	135.06	2.65565	NA
73.337	1.89484	186.059	2.17866	NA
73.3413	1.80539	175.671	1.87237	NA
73.3427	1.68772	126.764	1.76301	NA
73.3428	2.1047	94.4087	2.56938	NA
73.3466	2.47873	48.4584	2.45041	NA
73.3474	2.5457	152.305	3.3817	NA
73.3523	1.81108	156.457	2.45671	NA
73.3612	1.59888	189.186	3.17153	NA
73.3613	1.98329	121.499	1.63475	NA
73.3645	2.3818	153.039	2.4887	NA
73.3709	2.02159	102.351	2.13005	NA
73.3728	1.46638	890.855	0.979846	NA
73.3751	2.06474	223.347	3.14441	NA
73.3779	2.06643	156.894	6.78788	NA
73.3783	1.86326	92.3946	3.56968	NA
73.3804	2.39314	52.8379	2.26247	NA
73.3815	2.29886	99.3457	1.94852	NA
73.3846	1.61566	115.296	2.71092	NA
73.3862	4.05624	54.5617	3.10155	NA
73.3895	1.74328	140.415	1.28778	NA
73.3949	2.36155	63.4769	2.48355	NA
73.4008	1.77703	137.435	2.10138	NA
73.4017	1.6514	168.067	3.86857	NA
73.4062	2.30237	101.886	2.92919	NA
73.4067	1.78042	110.41	2.51263	NA
73.4089	2.58524	72.6928	2.32923	NA
73.4098	2.45576	500.972	4.27508	NA
73.4106	2.00111	172.676	2.93446	NA
73.4127	2.09701	69.949	1.65352	NA
73.4155	1.90827	83.5317	2.10287	NA
73.4194	2.14042	166.544	1.63904	NA
73.4195	2.10452	69.7125	1.94549	NA
73.4207	1.93155	116.513	3.21108	NA
73.4209	1.95344	136.475	3.18752	NA
73.4348	1.42071	90.5775	2.86295	NA
73.4404	1.77116	106.783	2.48382	NA
73.4453	1.97383	90.1026	2.22568	NA
73.4461	1.4374	127.362	4.99477	NA
73.4521	2.05764	148.067	2.01261	NA
73.4535	1.69938	62.5995	2.96193	NA
73.4549	1.87492	761.474	2.8627	NA
73.4579	2.26906	121.58	2.01826	NA
73.4612	1.47526	231.069	3.33425	NA
73.4815	1.80237	130.94	1.74571	NA
73.4842	1.92479	253.269	2.76867	NA
73.4852	1.9848	333.836	2.50329	NA
73.4853	2.01795	245.639	3.94728	NA
73.489	2.02842	383.286	2.82706	NA
73.4904	2.00544	151.099	2.32255	NA
73.4918	1.96115	406.76	2.85553	NA
73.4955	1.63417	439.832	2.21315	NA
73.4964	2.01898	125.186	3.46661	NA
73.4975	2.44784	165.072	2.63272	NA
73.4984	1.83684	117.253	1.93303	NA
73.5016	1.66719	98.3325	2.37283	NA
73.5019	1.80643	156.236	1.87146	NA
73.5022	1.93296	145.623	3.56045	NA
73.5033	2.15902	218.217	3.03035	NA
73.504	2.44597	70.5544	3.48015	NA
73.5041	2.15995	112.87	2.99572	NA
73.5094	1.90173	155.174	2.3591	NA
73.5207	1.59413	2697.49	9.63787	NA
73.5226	2.21633	203.754	4.08552	NA
73.5235	1.6004	158.136	1.7317	NA
73.5243	1.95326	126.021	2.14737	NA
73.525	1.74611	124.795	3.82413	NA
73.5332	1.81076	87.0473	2.16277	NA
73.5417	1.89627	243.72	3.66769	NA
73.5428	1.81941	221.033	2.4808	NA
73.5449	1.47779	333.693	3.63734	NA
73.5453	2.20277	155.337	2.05394	NA
73.5488	2.43055	31.8085	2.51905	NA
73.5507	1.30872	81.9198	2.27076	NA
73.5512	2.20113	127.282	2.20435	NA
73.5547	1.33476	95.7592	1.77124	NA
73.5561	2.23408	97.9585	3.06647	NA
73.5617	1.83665	144.672	2.76171	NA
73.5653	1.65695	404.054	2.17309	NA
73.5759	2.09753	203.383	1.40849	NA
73.5794	2.04987	144.635	1.70238	NA
73.5797	2.26266	84.8777	2.37579	NA
73.5821	1.59276	124.512	2.31469	NA
73.5859	1.82784	189.224	2.03316	NA
73.5903	2.05109	101.228	2.41639	NA
73.5904	1.98513	256.708	4.30761	NA
73.593	1.53643	115.716	3.35132	NA
73.5933	1.67692	184.218	1.58547	NA
73.5943	2.17205	110.107	2.32102	NA
73.5964	2.22859	229.081	4.43186	NA
73.6002	2.18936	96.352	2.03565	NA
73.6016	1.79291	44.2542	4.08685	NA
73.6123	1.87239	364.572	2.89518	NA
73.6134	1.58914	234.848	1.86135	NA
73.6135	1.78152	527.457	3.01581	NA
73.6213	2.03107	164.035	2.03064	NA
73.6235	2.32048	94.0391	2.21503	NA
73.6257	2.04227	137.21	1.67127	NA
73.6279	1.40693	104.594	1.76073	NA
73.6294	1.75878	191.898	1.47432	NA
73.6305	2.46284	91.6023	4.86559	NA
73.6309	1.5289	65.2969	1.84412	NA
73.6325	1.67156	126.344	4.29726	NA
73.6351	1.77794	252.591	3.79674	NA
73.638	1.84887	144.798	2.76907	NA
73.641	2.23356	300.355	2.52901	NA
73.6452	1.63567	316.22	1.55205	NA
73.6457	1.79688	606.623	2.14074	NA
73.6466	1.82409	83.3326	2.54562	NA
73.6494	1.39022	164.244	2.02178	NA
73.6503	1.3299	103.892	2.17172	NA
73.6509	1.67823	125.822	4.02524	NA
73.6541	2.22114	86.5989	3.29712	NA
73.6585	1.47923	182.484	3.51047	NA
73.6603	1.26861	293.595	2.88527	NA
73.6642	2.24919	131.824	3.22679	NA
73.6665	2.01678	152.972	1.60198	NA
73.6681	1.98353	74.707	5.16134	NA
73.6724	2.10269	153.94	4.13738	NA
73.6799	1.94473	157.903	2.47183	NA
73.6817	2.05381	111.409	1.62395	NA
73.6834	1.54182	108.816	2.73975	NA
73.687	1.16673	1271.91	3.71106	NA
73.69	1.962	103.301	4.1667	NA
73.6921	1.97919	107.374	1.72858	NA
73.6947	1.63562	282.025	2.30187	NA
73.6954	1.80469	142.837	1.69353	NA
73.6963	1.45661	196.592	2.96764	NA
73.6994	2.46382	60.29	3.46529	NA
73.7046	1.89286	68.4736	2.87515	NA
73.7076	1.48924	306.836	2.70791	NA
73.7093	2.33324	70.6464	2.51734	NA
73.7099	2.07749	182.12	1.89618	NA
73.7115	2.23311	84.0802	2.52094	NA
73.7122	1.94272	484.213	1.76855	NA
73.7202	1.5683	117.505	2.20932	NA
73.7208	1.7607	100.18	1.33366	NA
73.7239	1.91865	267.281	3.44882	NA
73.7243	1.74292	51.6782	2.13225	NA
73.7248	1.90563	162.329	1.50834	NA
73.7285	1.8457	295.569	6.32401	NA
73.7303	2.49083	51.7308	3.13205	NA
73.7336	1.79879	202.334	2.35545	NA
73.7384	1.8726	54.5415	1.67177	NA
73.7389	1.98784	193.545	4.38576	NA
73.7399	2.1414	122.141	2.84915	NA
73.7426	2.33761	181.95	1.87604	NA
73.7442	1.9835	88.8829	2.16979	NA
73.7458	2.38403	121.875	2.4668	NA
73.7465	1.92189	59.6622	2.23335	NA
73.7501	1.68683	240.759	7.35313	NA
73.753	1.69308	112.149	1.70374	NA
73.7568	2.40664	321.874	2.80444	NA
73.757	1.94948	170.622	2.27374	NA
73.7582	2.1113	90.0745	1.90926	NA
73.7591	2.58466	43.8311	2.19855	NA
73.7621	1.64593	159.64	3.27206	NA
73.7637	1.73862	96.6009	2.69591	NA
73.7637	2.34	210.154	2.18827	NA
73.7669	1.80656	231.396	2.13095	NA
73.7685	2.08137	376.358	2.18075	NA
73.7693	1.60488	368.509	1.72265	NA
73.7705	1.94437	282.134	3.69531	NA
73.776	1.78813	203.373	2.70138	NA
73.7771	2.17769	66.1724	2.46318	NA
73.7776	1.94503	126.846	2.66355	NA
73.7784	1.64416	113.86	1.7615	NA
73.7792	2.61893	490.517	4.42453	NA
73.7828	1.91613	158.663	1.79859	NA
73.7865	1.68593	433.114	2.70225	NA
73.787	1.66832	112.515	2.27263	NA
73.7909	2.05653	144.893	1.61625	NA
73.7928	2.36023	75.512	1.76485	NA
73.7954	2.38282	150.121	3.09349	NA
73.7964	1.77705	137.006	1.42526	NA
73.7986	1.66965	142.203	1.51281	NA
73.8032	1.84412	95.7367	2.56267	NA
73.8046	2.20752	321.658	3.2205	NA
73.8058	2.26015	108.127	2.62859	NA
73.8075	2.5566	165.626	3.24755	NA
73.8186	1.91507	121.842	2.4152	NA
73.8273	2.01129	251.544	2.29784	NA
73.8283	1.93981	105.972	2.73241	NA
73.8339	2.1404	349.005	2.56311	NA
73.8474	1.57663	837.967	4.13801	NA
73.8493	1.91688	158.363	1.43136	NA
73.8523	1.69238	100.487	3.35975	NA
73.8528	1.8748	281.346	3.57897	NA
73.8539	1.6403	734.45	3.18473	NA
73.8562	1.63534	204.108	1.7948	NA
73.8582	1.72037	222.155	1.59701	NA
73.8629	2.01408	121.906	2.90504	NA
73.8655	1.72879	114.749	3.18459	NA
73.8656	1.96142	99.5456	1.63974	NA
73.8715	1.46189	696.951	6.46485	NA
73.8732	2.03413	169.944	2.63536	NA
73.874	2.54768	108.85	2.54037	NA
73.8781	2.30822	136.699	1.61723	NA
73.8781	2.07604	160.933	1.83459	NA
73.8793	1.75311	221.518	4.35223	NA
73.8838	2.05766	63.8398	2.18906	NA
73.8875	1.74174	248.908	3.09257	NA
73.889	2.00906	100.594	2.53033	NA
73.8894	1.80042	111.665	2.12952	NA
73.8978	2.01396	282.034	3.68726	NA
73.9019	1.93489	105.849	5.49644	NA
73.9048	2.05558	60.7356	1.90731	NA
73.9095	1.97483	144.786	3.62323	NA
73.9133	5.17664	73.828	2.26495	NA
73.9157	2.484	29.2292	2.26193	NA
73.9196	1.77906	164.37	2.74766	NA
73.9226	1.81459	417.178	4.23108	NA
73.9242	1.93299	84.7416	2.29516	NA
73.9296	1.38382	154.285	1.94439	NA
73.9324	1.7165	117.748	1.54252	NA
73.9333	2.10837	118.796	2.37503	NA
73.9419	2.29763	72.4656	2.05287	NA
73.9419	2.64438	48.7502	2.25894	NA
73.944	1.3494	352.917	2.00061	NA
73.9513	2.12343	76.8485	1.74227	NA
73.9566	2.04323	262.593	3.4131	NA
73.9619	1.28487	228.893	2.64778	NA
73.9685	2.15431	58.7136	2.13369	NA
73.9703	1.93128	184.149	2.78382	NA
73.9728	1.98293	90.0546	2.87405	NA
73.982	1.38884	162.835	2.4622	NA
73.9832	1.56914	243.885	3.46042	NA
73.9938	2.72374	58.1153	2.17788	NA
73.9986	2.32606	99.7084	2.34322	NA
74.0023	1.73273	103.863	1.83504	NA
74.0104	1.73355	166.892	1.82174	NA
74.012	1.83494	224.445	6.37716	NA
74.0201	2.02588	86.6424	2.77247	NA
74.0215	1.69169	83.814	1.95131	NA
74.034	2.02509	127.655	2.58547	NA
74.0349	2.51265	43.4601	2.85467	NA
74.0351	2.07676	172.997	1.86478	NA
74.0386	2.385	129.183	2.25294	NA
74.0398	1.9019	204.158	1.65103	NA
74.0469	1.82611	291.218	1.67427	NA
74.053	1.83328	468.833	2.74924	NA
74.0609	2.18737	150.582	1.82163	NA
74.0613	1.9071	126.073	1.53244	NA
74.0619	2.16584	73.6719	1.57815	NA
74.062	1.75797	142.67	1.84796	NA
74.0698	2.05438	143.354	2.03573	NA
74.0702	1.78803	136.127	2.63611	NA
74.0712	2.12521	173.489	1.62103	NA
74.0719	2.28271	136.665	2.14879	NA
74.0759	1.7793	252.733	2.15684	NA
74.0783	1.37347	301.87	2.54822	NA
74.0783	1.79154	122.725	2.93227	NA
74.0833	2.07402	145.386	1.96728	NA
74.0855	2.32402	87.4863	3.67159	NA
74.0911	2.0583	145.132	3.90722	NA
74.0929	1.6196	104.579	2.10937	NA
74.103	1.60141	581.615	2.11261	NA
74.1058	2.11991	81.3147	2.02604	NA
74.111	1.90303	353.536	2.91621	NA
74.1113	1.81619	116.843	1.88713	NA
74.1168	1.58088	160.862	2.67964	NA
74.1175	1.70067	103.733	2.17029	NA
74.1179	2.25826	90.618	3.92542	NA
74.1197	1.97188	81.1931	2.90084	NA
74.12	2.08217	314.139	4.71333	NA
74.1217	2.49719	103.492	2.31569	NA
74.1232	1.90692	215.595	2.03994	NA
74.1271	1.97257	122.082	4.03628	NA
74.1324	2.33635	70.1379	1.86593	NA
74.1388	1.95762	181.618	3.18862	NA
74.1509	2.25539	232.006	1.44561	NA
74.153	2.13158	143.526	3.29139	NA
74.1569	2.63817	41.9705	2.91001	NA
74.1776	2.18422	78.9871	2.17462	NA
74.18	2.17433	42.9594	2.07824	NA
74.1801	2.24488	66.5298	1.76036	NA
74.1808	2.14609	100.491	2.87107	NA
74.1856	1.81701	148.729	2.18715	NA
74.1932	1.71574	72.4488	2.36831	NA
74.1966	2.06852	180.93	1.62259	NA
74.1973	1.37689	451.354	2.71774	NA
74.2067	1.85829	382.615	4.32702	NA
74.2096	1.42313	210.958	2.20185	NA
74.2121	1.78028	130.526	2.55528	NA
74.2146	1.48861	143.609	1.77694	NA
74.215	2.0373	81.5685	1.86694	NA
74.2184	2.04752	103.625	1.7024	NA
74.2207	1.61512	1119.58	2.45973	NA
74.231	1.68786	204.983	2.19719	NA
74.232	1.6831	126.136	1.55911	NA
74.2353	1.79157	201.063	1.74781	NA
74.2398	1.91615	147.264	2.04401	NA
74.2483	2.06822	123.628	2.10915	NA
74.2491	1.73462	139.677	1.62519	NA
74.2501	1.55879	130.519	1.21205	NA
74.2533	2.3264	160.622	3.50345	NA
74.2534	2.20331	142.996	1.94584	NA
74.2633	1.53877	172.835	2.53099	NA
74.2633	1.75548	125.607	3.27873	NA
74.2707	1.6191	83.3571	1.54196	NA
74.2826	1.84854	545.27	3.64181	NA
74.2842	1.55166	788.761	4.87372	NA
74.2849	1.54268	93.6674	3.14296	NA
74.2865	2.13086	142.386	5.02058	NA
74.2868	1.68111	582.8	3.35304	NA
74.2926	2.01748	297.598	1.98897	NA
74.2953	1.41345	141.424	3.31803	NA
74.2981	2.22827	311.26	3.15251	NA
74.2988	2.09801	87.2206	2.56512	NA
74.2988	2.21617	172.523	1.91305	NA
74.299	2.12782	118.67	3.79811	NA
74.2999	2.3476	93.4319	2.31401	NA
74.3035	2.0733	186.074	2.58395	NA
74.3111	2.10226	199.426	1.74235	NA
74.3128	1.73813	85.5773	2.54785	NA
74.3145	2.09681	185.31	2.05	NA
74.3189	2.36978	90.006	1.50201	NA
74.3236	1.6455	158.816	1.74867	NA
74.3251	2.03394	214.527	2.88584	NA
74.3265	2.18338	143.494	2.38782	NA
74.3336	2.07956	89.4876	2.90185	NA
74.3362	1.4861	207.141	1.78295	NA
74.3452	1.5147	428.75	3.53116	NA
74.3454	1.47836	530.903	5.86407	NA
74.3486	2.30245	156.571	3.55103	NA
74.3516	1.88609	116.233	1.61938	NA
74.3672	1.63911	134.944	1.75525	NA
74.3681	1.57763	201.367	2.2341	NA
74.3705	1.83345	98.5488	2.52023	NA
74.3783	2.67111	51.8492	3.81879	NA
74.3892	1.45264	296.969	2.30872	NA
74.4044	2.28969	105.892	2.35419	NA
74.4062	1.8922	142.488	3.32642	NA
74.4076	1.99938	206.03	2.07356	NA
74.4118	1.24538	602.555	12.6998	NA
74.4131	2.54502	32.0514	2.86882	NA
74.4139	1.64915	56.5669	1.91936	NA
74.4157	1.85826	70.9582	1.54301	NA
74.4259	1.85305	144.676	2.7423	NA
74.4323	1.98097	59.6116	2.58801	NA
74.4335	1.63028	95.0633	2.34124	NA
74.4337	1.87685	128.011	1.79519	NA
74.4399	1.64873	152.2	2.22435	NA
74.4404	2.6606	75.817	2.47342	NA
74.4476	1.98954	212.774	2.40581	NA
74.4564	2.54792	84.0152	1.71162	NA
74.4587	2.24332	1565.08	7.00956	NA
74.4641	1.91343	152.849	1.52014	NA
74.4644	1.63015	211.956	3.02438	NA
74.4663	2.04904	131.111	1.59828	NA
74.4671	1.92865	70.8148	2.38876	NA
74.473	2.04239	176.538	1.8667	NA
74.4745	2.27389	330.007	7.53923	NA
74.4763	1.69928	96.7115	2.53276	NA
74.4773	1.87099	209.196	1.66726	NA
74.4779	1.95858	248.422	2.11877	NA
74.4843	1.91618	132.896	1.80666	NA
74.4851	1.88776	136.997	1.70006	NA
74.488	2.21127	131.243	1.63876	NA
74.4901	1.54058	158.997	1.58545	NA
74.4908	1.50499	212.452	1.80006	NA
74.4914	2.06103	142.586	1.58317	NA
74.4924	2.03799	254.807	2.88676	NA
74.4975	2.64598	86.6457	2.10247	NA
74.5099	1.81171	108.948	2.37354	NA
74.5114	1.44157	319.147	2.25695	NA
74.5121	2.07519	236.473	2.61556	NA
74.518	2.38673	148.061	2.34806	NA
74.5229	2.69169	70.2118	2.45571	NA
74.5229	2.054	101.412	2.05428	NA
74.5232	2.13163	91.3737	2.71885	NA
74.525	2.24613	148.387	2.92667	NA
74.5251	2.57726	65.7454	2.16034	NA
74.5287	1.68937	194.301	2.10871	NA
74.531	1.96555	188.343	1.842	NA
74.5313	1.83783	3741.82	4.32248	NA
74.5333	1.81929	1025.97	6.59663	NA
74.5427	1.69934	127.309	1.89413	NA
74.5439	2.52435	83.0174	1.85473	NA
74.5468	1.6953	133.394	2.19433	NA
74.5476	2.02381	118.646	2.44709	NA
74.5519	2.15277	77.1241	2.00341	NA
74.5544	1.82451	220.083	2.80798	NA
74.5561	2.45989	209.361	2.12718	NA
74.5601	2.52722	67.4309	2.20223	NA
74.5656	1.85585	101.222	3.05791	NA
74.5667	1.92051	46.4928	1.83363	NA
74.5668	1.95914	81.6172	1.76901	NA
74.5696	1.9429	172.741	3.21636	NA
74.5755	1.86128	103.3	1.59923	NA
74.5784	1.83078	72.9388	2.09735	NA
74.579	1.63873	171.84	1.63763	NA
74.5869	2.1896	139.224	3.33291	NA
74.5881	2.03341	73.811	2.12054	NA
74.5887	1.82686	124.211	2.05846	NA
74.5894	1.61703	205.42	2.19849	NA
74.5935	1.75166	59.248	2.64193	NA
74.6027	1.39645	883.709	4.8785	NA
74.6058	2.46976	50.5797	2.9213	NA
74.6061	2.15665	105.435	1.94797	NA
74.6068	2.1398	544.882	2.59579	NA
74.6202	1.77882	109.325	2.60628	NA
74.6204	1.67651	125.389	1.82474	NA
74.6219	1.7074	299.441	2.85364	NA
74.6234	1.53677	155.945	2.82939	NA
74.6316	1.38891	157.295	2.06456	NA
74.6337	2.02793	150.53	1.67085	NA
74.6361	2.21781	60.5584	2.63938	NA
74.6407	1.92644	125.886	1.71244	NA
74.6444	1.84233	174.205	2.02063	NA
74.6448	2.17798	248.177	1.67166	NA
74.6519	2.13139	177.553	3.05111	NA
74.6545	1.63532	188.827	1.68014	NA
74.6626	1.44091	108.126	1.77771	NA
74.6678	1.32756	621.738	3.06877	NA
74.6696	1.58292	152.62	1.61679	NA
74.6714	2.0481	273.001	2.12707	NA
74.6742	2.08381	88.2598	2.72021	NA
74.6797	2.34058	217.053	3.60414	NA
74.6845	2.01437	54.8673	1.48603	NA
74.6952	1.8991	239.408	2.79039	NA
74.7004	2.30833	72.7667	1.47416	NA
74.7015	1.57416	97.7188	1.89765	NA
74.7017	2.31658	114.29	2.53028	NA
74.7054	1.87362	77.6559	2.43668	NA
74.7077	2.21883	67.7112	1.81079	NA
74.7225	1.38582	155.271	3.68548	NA
[truncated: 3,821 more rows]

## Sheet: Western Alaska Range
ZUPb Age (Ma)	-2 sigma (Ma)	[U] (ppm)	U/Th
3.04691	0.21576	152.186	1.86672			397
4.57386	0.405472	377.033	1.08552
21.984	0.296279	339.71	1.30202
25.3343	2.05312	501.434	2.33448
25.5655	0.953763	1674.28	2.78684
26.2727	0.759245	1320.46	2.07431
26.6822	0.645928	5058.09	2.12417
27.1589	3.07664	3640.47	1.8785
27.227	1.71883	975.774	1.74941
27.7703	1.74317	984.275	2.70508
27.8468	1.77376	586.978	3.2779
28.172	2.69963	284.443	1.86765
28.3977	0.806435	4780.18	1.18076
28.4039	3.03166	1492.78	1.77702
28.7129	1.4797	689.254	2.36101
28.9065	1.81479	514.446	2.42278
29.0182	1.498	2057.91	2.18596
29.0182	1.91576	301.942	1.75279
29.2867	2.39005	692.016	2.77094
29.3556	1.9432	415.434	2.99969
29.478	1.55145	931.127	1.9604
29.4956	2.9883	786.232	1.88245
29.5759	1.96762	822.419	2.04684
29.748	1.84209	625.059	3.06039
29.8413	1.88491	691.784	2.19331
29.8604	2.08381	1477.59	1.53203
29.9415	1.51002	776.442	2.34806
30.184	1.56811	460.49	2.34622
30.3148	1.19172	1646.53	1.42957
30.3438	2.21982	1795.46	2.31212
30.5029	1.95815	769.918	1.99367
30.5786	6.7568	302.01	2.82027
30.945	1.56027	2199.59	1.75979
31.02	1.07686	741.274	2.2817
31.124	1.26652	892.315	1.71575
31.2341	2.49335	676.289	1.40031
31.2983	1.23895	712.63	2
31.4635	1.68558	662.777	2.08552
31.6639	3.08673	962.883	2.69087
32.1846	2.59394	732.545	2.03784
32.3039	3.51166	630.643	2.85902
32.8743	2.78179	327.684	2.53248
35.6452	0.854444	2851.42	1.15869
37.3034	4.02711	506.84	2.14194
38.9953	0.916777	493.991	3.59525
39.4946	0.789314	221.458	3.58055
40.5697	0.733165	424.99	1.88175
40.6405	1.42065	129.541	3.07721
41.156	0.529221	530.286	3.5047
41.8435	1.11289	140.271	2.76481
44.3542	2.57064	520.784	2.76927
50.2541	2.09746	114.104	2.93581
52.2973	1.00407	175.969	5.63373
52.7721	0.924997	380.16	2.33392
52.9551	0.548477	391.27	2.62217
53.6286	1.93895	320.22	4.94175
54.4174	2.13502	217.426	2.31817
54.8943	1.94009	515.713	6.89671
54.9202	2.48268	554.365	2.98821
55.0818	3.05498	397.241	5.01714
55.2105	2.50543	641.984	1.90091
55.3428	1.45907	61.9203	2.99189
55.4353	1.76009	515.269	9.96972
55.6427	0.365662	269.751	4.74972
55.6455	5.3479	245.514	5.03856
55.8086	4.90724	498.66	2.51118
56.2435	0.459191	377.997	4.27771
56.2542	1.91073	470.444	3.48374
56.7364	4.31216	500.49	5.88896
56.8332	2.67394	396.879	3.88868
56.8489	1.24541	241.26	2.40544
56.8949	2.04614	422.353	11.3916
56.9451	4.04991	225.177	3.51873
56.9512	1.47628	624.374	3.18516
57.1592	0.540612	298.562	3.25407
57.3428	4.25233	170.961	2.70063
57.4661	2.71177	244.08	3.30293
57.5057	1.52034	1601.89	8.91511
57.5895	1.59802	578.314	3.43701
57.6954	2.51056	317.825	3.87695
57.7434	1.94684	480.699	3.33107
57.7731	1.41821	792.081	4.36486
57.8812	2.0763	735.6	3.82416
57.9505	1.78682	478.501	4.32422
58.0785	1.72433	539.385	4.00731
58.1082	3.15484	367.054	3.01192
58.1533	1.73388	62.4636	3.69232
58.2491	1.83701	1197.22	3.29706
58.2506	1.91471	428.204	3.30245
58.3801	1.64504	560.312	3.57103
58.6226	1.25056	473.558	2.00099
58.6443	1.9679	576.552	3.32827
58.6527	1.87041	400.982	5.86386
58.6531	1.02945	140.093	2.16589
58.6702	1.41801	593.252	3.04094
58.6793	1.79576	534.513	2.94544
58.7052	1.75616	395.74	3.12796
58.7325	1.08068	602.119	3.70247
58.7945	0.556009	847.327	6.47478
58.8774	1.12047	228.056	3.71915
59.0235	2.07897	587.503	4.07777
59.0677	5.16071	258.72	3.27224
59.0936	3.1772	491.083	8.82526
59.1545	1.67378	1129.66	4.79968
59.1613	2.79788	459.092	3.71029
59.1895	0.435998	2850.05	12.2766
59.3081	1.23976	505.667	3.98299
59.3215	1.69094	106.482	4.05695
59.3218	0.501923	472.214	2.20762
59.4987	2.94395	208.663	2.16443
59.5246	3.74211	661.043	3.86512
59.5383	2.39409	709.674	3.16899
59.6654	2.05745	573.415	3.59166
59.6844	2.14882	676.322	3.53606
59.8136	1.51587	519.528	2.59266
59.8314	2.26452	261.408	2.79106
59.8794	1.9127	399.743	2.99018
59.9075	1.85634	497.644	4.01781
60.0887	1.4758	306.342	2.57444
60.1207	1.87607	405.154	4.08196
60.225	1.9796	483.143	3.7217
60.3293	2.74711	235.772	2.9822
60.3643	3.20704	280.784	3.09087
60.3649	1.33723	996.046	1.9636
60.4816	1.02663	506.123	2.92448
60.5428	1.07097	315.386	3.59377
60.5996	4.21363	267.906	1.68778
60.6049	7.28753	113.904	3.42558
60.6402	1.0281	292.498	6.4574
60.7115	2.6236	308.516	3.02595
60.7244	1.54542	110.732	4.80439
60.7265	1.18592	158.262	3.52885
60.7513	0.994221	575.373	3.50939
60.7648	1.99466	441.267	3.19101
60.8139	1.36576	296.778	2.69187
60.8663	0.527045	179.41	4.60427
60.8858	1.50736	427.422	3.05403
60.9246	3.41996	423.806	3.16638
61.0125	0.704406	420.047	4.40482
61.0358	3.00264	565.215	1.66606
61.0381	3.18691	294.993	3.96013
61.2558	1.84833	453.12	3.85523
61.2574	1.09254	141.26	3.14213
61.279	1.11809	600.349	3.54058
61.3396	1.13592	300.646	6.32566
61.4039	0.917591	480.266	4.93394
61.5313	2.74965	160.679	5.64982
61.8063	1.4636	230.769	3.31776
61.8256	1.31348	128.737	3.53434
61.9103	1.19386	533.763	2.90668
61.9283	1.45851	564.306	2.80491
61.9524	1.32625	435.522	3.42046
62.113	1.6851	134.618	4.06686
62.1416	0.340137	347.485	1.74911
62.1537	1.29489	226.362	3.09908
62.281	2.26367	384.178	3.16282
62.4028	2.11747	574.826	3.45787
62.5147	2.3945	590.512	3.666
62.638	4.73759	210.905	2.94661
62.7019	2.48426	432.627	2.48292
62.7045	1.23785	310.059	4.56919
62.859	0.475407	632.064	6.70871
62.8853	4.27912	368.562	2.29099
62.9439	1.81132	895.196	3.5861
62.9781	4.77693	525.478	5.5297
63.0269	2.38822	473.437	2.44767
63.0524	1.09373	438.841	3.85305
63.1341	1.6671	166.082	4.07658
63.2861	1.3414	344.026	3.04009
63.3548	1.94211	1328.6	3.99165
63.3655	2.895	420.863	3.07044
63.3982	2.16433	305.108	2.24715
63.471	1.19564	309.112	3.73854
63.4827	1.00942	871.549	5.79948
63.5823	3.19478	207.191	3.44916
63.6181	2.62546	588.56	4.23946
63.6189	2.77159	183.532	3.1134
63.7855	2.83697	208.402	2.36949
63.8852	2.29811	211.105	4.22038
63.9134	2.37572	396.863	2.25344
64.0328	2.63747	691.241	3.90616
64.0419	1.77144	826.983	4.02814
64.1386	1.44419	1129.3	4.52452
64.236	5.30577	158.871	3.12028
64.2618	2.98744	472.014	4.16099
64.3311	2.15184	539.442	2.95129
64.3889	2.21421	565.3	4.38863
64.4064	2.37402	247.256	3.54689
64.4158	0.883296	365.84	3.62645
64.4536	4.42726	246.297	5.1948
64.4551	1.8322	466.578	3.36955
64.5091	2.30093	366.296	6.43882
64.5228	2.18222	518.835	3.91263
64.6362	2.77267	231.481	4.22834
64.6909	1.5993	1015.24	2.626
64.7206	2.01627	189.285	3.6993
64.7404	2.3602	223.385	4.15223
64.7511	1.1017	198.531	6.51974
64.8423	1.97971	583.024	3.73674
64.9283	4.11948	334.109	3.17115
64.9313	2.74364	525.518	2.37595
64.939	4.38735	653.449	2.20732
64.9648	4.39494	106.797	4.50109
64.9656	3.22606	491.059	3.58117
64.9735	1.16586	334.505	2.63834
65.0044	1.5277	910.615	3.80136
65.0173	3.31734	208.127	2.92949
65.0219	2.70555	259.717	4.34522
65.0302	2.04965	323.613	2.55278
65.05	2.00094	406.746	2.76929
65.0531	2.13334	686.257	3.15164
65.0531	1.32603	359.428	3.57639
65.0706	2.57008	197.719	2.50472
65.0729	1.9066	355.264	4.32091
65.0759	1.75441	710.729	3.96117
65.1269	2.70702	376.103	2.6925
65.1927	0.77837	1584.06	3.74287
65.1961	2.44373	225.712	3.25567
65.209	1.89285	822.951	1.91129
65.2752	2.31587	336.445	2.87838
65.3733	2.62932	369.073	3.12873
65.4677	3.92432	741.383	2.277
65.4768	2.14537	533.926	1.37105
65.5026	1.14362	464.356	3.86789
65.565	2.84532	595.522	3.83066
65.5711	2.0373	1036.84	3.8135
65.6358	2.65963	368.512	4.27544
65.7369	2.63829	632.707	1.95612
66.0787	0.427318	198.001	3.33573
66.0861	2.55295	327.017	4.2849
66.1226	1.94267	394.372	3.25842
66.2767	1.47296	54.036	2.30745
66.3533	2.62769	298.446	4.46601
66.3554	2.15421	645.354	4.61973
66.3591	2.36568	332.46	4.08157
66.4538	1.56642	276.312	2.71026
66.4771	1.95905	120.366	2.65084
66.4854	4.41976	192.716	2.66633
66.4968	2.48888	327.459	2.8024
66.5143	2.49953	399.818	1.77839
66.5896	3.05939	204.746	6.57494
66.6117	1.932	898.361	2.52244
66.6877	2.38078	298.964	2.54551
66.7006	3.28605	715.174	3.89663
66.7715	1.55027	443.001	3.09182
67.5632	1.49511	562.707	2.41836
67.6878	2.95847	1317.36	5.0407
67.7114	3.41636	636.533	2.22416
67.8429	2.49139	196.303	2.31861
67.9676	1.92703	501.07	3.15473
68.1011	1.45031	397.552	4.29987
68.2855	1.84328	408.089	4.39027
68.9508	3.19516	202.659	2.92119
68.9823	1.54383	219.984	1.72261
69.0192	2.40122	548.269	3.95323
69.1363	2.3236	353.927	3.00337
69.2788	2.51514	121.744	4.61285
69.451	1.18815	201.922	1.69026
69.6616	2.72793	505.138	3.78731
69.7186	2.54085	434.254	4.19961
69.7881	0.742705	421.387	2.14286
69.8889	2.0922	463.606	12.8279
70.0996	0.508955	404.881	5.27281
70.108	2.60783	81.3277	2.01753
70.2059	3.32227	364.991	4.81123
70.3579	2.55277	345.299	3.46564
70.6804	2.10191	42.3305	2.35069
70.7577	2.75484	754.835	3.47651
71.0435	1.381	346.74	2.20847
71.6131	1.75136	253.971	2.34801
72.1632	1.63615	408.498	1.87977
72.2383	2.50399	298.982	3.22723
72.8947	3.60515	231.658	2.02181
73.7912	1.34841	190.254	2.89363
73.8425	1.90074	455.076	3.30403
74.0283	1.68201	166.962	3.14054
74.2203	0.368973	669.596	6.23104
74.7397	1.98403	130.183	2.71755
75.0528	0.992414	284.05	3.43006
75.1753	1.64425	119.209	1.53406
75.1975	3.06413	275.219	3.93913
75.3368	1.58682	104.453	4.12337
75.8081	2.47425	34.1384	4.71634
76.5855	1.27262	132.805	2.96823
77.8339	2.01925	71.4575	1.71035
79.0581	1.23363	130.645	2.06093
79.2141	2.68467	76.787	3.17286
79.2172	2.31194	388.001	4.27196
79.2979	1.51249	81.8217	2.01828
79.3827	3.37678	166.821	1.64539
81.1738	1.7855	241.22	2.40157
82.169	2.71776	248.165	3.05252
82.3454	1.04732	58.1733	2.03345
82.9703	1.43443	380.802	4.75864
85.0267	1.63024	82.4319	2.73841
85.0763	2.6792	118.938	1.85153
86.2716	2.09711	72.8066	2.06988
86.7482	1.76643	309.897	3.3621
88.8964	1.95949	275.789	1.91251
89.2422	1.6437	111.275	3.01697
89.6738	0.58775	492.36	2.73586
90.284	1.566	77.6384	2.37172
91.0194	5.00109	128.128	2.84281
91.5477	1.02718	105.857	4.16003
92.5228	0.826758	329.356	2.29374
94.5144	2.3372	475.608	3.13713
94.6142	0.469616	539.447	2.67778
94.8344	0.470701	745.605	1.64919
95.1611	2.83834	740.634	5.17821
95.4438	2.12698	62.8096	1.63412
95.7517	1.79007	393.682	2.09526
97.0885	1.51287	450.728	2.77266
98.005	0.486319	1199.96	4.2462
98.3486	2.79821	104.558	2.11439
98.4136	2.69864	298.232	3.83384
98.4405	6.30136	256.151	1.61999
98.5845	2.06051	163.295	2.25237
98.7889	0.490179	550.027	2.4289
98.7984	2.74941	73.2777	5.64604
99.4478	5.79012	202.518	1.84149
99.6338	3.03524	134.16	3.77597
99.7435	2.38936	64.7003	3.71075
99.9336	0.99163	400.892	4.83228
99.9697	2.82716	1794.02	1.99573
100.049	1.70508	529.589	1.82316
100.342	5.56223	120.055	4.1447
100.93	5.15908	119.282	2.44983
100.978	5.9386	289.262	2.44971
101.071	1.75417	218.406	2.3979
101.55	5.01935	162.28	2.02615
102.065	6.13133	164.71	2.25277
102.264	4.86745	175.466	1.78721
102.359	3.81417	233.569	2.62385
102.448	4.41182	239.3	1.50811
102.582	1.91682	234.774	6.28383
102.918	1.40899	206.621	2.77916
103.833	1.74356	490.858	3.15602
104.765	10.7197	79.4291	1.93492
104.807	1.67375	640.289	3.60523
106.522	3.96897	659.633	1.6717
107.1	0.754128	451.821	2.59943
107.505	4.31008	386.551	1.64455
108.109	2.17985	365.471	2.404
108.27	8.28937	109.128	2.86964
110.722	1.19657	719.927	3.17743
112.14	4.44759	147.969	1.76086
112.745	10.2847	111.603	2.39152
113.145	2.48991	166.543	1.64064
113.265	0.79716	521.34	2.8053
114.27	3.0581	481.555	2.67102
114.874	1.6737	627.49	57.2774
114.968	0.922987	177.472	1.83992
115.397	1.65837	321.491	7.4853
116.093	5.08538	77.7559	5.01273
116.802	1.73625	242.101	2.46666
124.999	2.2902	457.657	1.50837
133.729	1.4294	178.441	2.37862
141.71	2.04639	153.416	1.24984
142.729	7.58333	119.741	2.57127
145.638	1.15204	139.298	2.31759
146.027	3.49888	139.093	1.51143
146.529	4.70849	188.818	3.83395
147.655	6.18944	45.0356	3.39358
149.675	5.53336	66.3759	3.564
151.112	10.2028	169.965	4.80574
152.774	3.72697	93.8949	5.13431
155.018	12.3351	1118.97	1.00975
155.563	2.16719	131.366	2.81842
159.976	1.01125	105.395	4.40478
160.222	5.42787	76.663	2.264
161.035	3.76925	40.0103	2.19229
161.39	0.972263	88.4148	3.51936
164.396	2.62955	101.147	2.27713
164.549	1.4622	89.4627	2.38904
164.578	8.05978	156.492	1.68686
169.152	1.369	125.27	2.47237
171.867	1.25501	242.901	6.20988
172.342	1.10538	233.381	4.78475
172.354	2.84234	224.267	1.789
172.983	1.97992	526.061	3.68154
173.645	3.27191	85.1727	3.05035
174	1.75106	91.5697	2.62883
177.756	6.39182	371.262	1.77316
179.141	2.77379	89.5529	2.42041
179.794	3.65258	848.825	3.42354
183.62	2.64303	112.854	2.07916
188.011	2.13091	145.225	1.82101
188.815	1.78633	388.949	2.31121
188.903	14.1302	58.7041	3.63666
197.471	4.53132	275.013	2.98283
197.95	4.40358	53.732	2.67275
198.606	6.02379	105.474	2.71549
199.322	4.96569	181.742	2.14561
201.936	5.46597	33.888	4.7957
202.596	3.68975	152.402	2.01414
216.788	1.72679	101.598	1.98178
233.742	4.86979	221.139	3.64228
292.492	10.2487	180.961	2.45031
343.739	6.44987	330.688	1.78709
347.217	7.3691	95.4682	2.27826
349.713	10.1057	367.927	2.2273
356.234	4.86223	160.657	4.13054
360.348	5.49437	116.206	5.45228
368.93	7.39871	420.065	2.30967
419.187	13.6688	120.388	2.27746
433.415	11.9097	172.583	2.14264
974.221	32.242	191.304	2.75913
991.417	31.7959	156.788	1.4031
1795.28	22.7337	146.311	1.98751
1809.07	22.8011	268.94	3.8887
1809.28	23.6453	84.1333	1.14661
1822.69	13.6521	296.674	2.82361
1850.64	20.4402	286.247	1.44321
1862.45	24.1577	130.122	2.55252
1862.52	17.7022	122.78	1.73027
1869.32	24.3002	234.602	2.79957
2057	18.1788	459.764	4.19483
2068.64	27.7826	273.51	18.7655
2651.59	21.5505	45.4746	7.96655

## Sheet: Central Alaska Range
ZUPb Age (Ma)	-2 sigma (Ma)	[U] (ppm)	U/Th
33.885	1.29962	493.549	2.46738			463
34.0631	1.03048	480.345	2.97784
34.1854	1.85	360.296	3.22785
34.55	1.20317	718.016	4.15022
34.7434	1.03038	1521.32	3.06868
34.9344	1.39114	377.989	3.83974
35.0239	1.2306	583.17	5.2686
35.0713	1.10676	644.635	3.51062
35.082	1.2153	568.71	4.62275
35.1767	1.21681	619.465	4.17025
35.1974	1.34828	1006.43	3.22895
35.2486	1.03641	890.023	3.91118
35.2493	1.52713	417.587	4.33044
35.2532	0.94774	613.691	4.78481
35.2585	1.78854	229.656	2.69725
35.4037	1.29472	343.31	3.72409
35.4526	0.900331	1033.38	3.41391
35.4878	1.00426	492.723	4.16298
35.5382	1.29164	464.802	3.01049
35.6246	1.78997	714.472	3.74152
35.6559	1.55302	423.537	5.35004
35.6582	2.01315	242.01	3.8713
35.6636	1.02411	801.53	3.65685
35.6812	1.00271	751.628	4.07793
35.7171	1.33747	509.882	4.46589
35.727	1.65542	606.788	3.67322
35.7423	0.990473	901.496	3.40822
35.7522	1.33899	565.337	5.45721
35.7966	1.10511	844.803	3.9442
35.8034	1.10664	628.674	3.3378
35.8088	1.11427	801.341	3.86559
35.8722	0.846773	2447.19	16.2774
35.8921	1.07452	1098.93	3.24109
35.9104	1.63091	837.571	5.14966
35.9624	0.845232	1118.91	2.53552
36.0273	1.24416	767.535	3.65596
36.0418	2.52513	728.782	1.98057
36.0824	1.20899	712.803	3.39479
36.1649	1.58041	583.619	3.37513
36.1687	1.11574	308.041	5.25785
36.1763	1.23037	855.031	4.05135
36.239	1.46423	494.997	4.65554
36.2535	1.12796	1066.75	3.89073
36.2543	1.4688	457.194	5.06043
36.2566	1.82036	286.156	5.09633
36.2948	1.43058	520.512	3.89584
36.3032	1.25786	750.085	3.6098
36.3445	1.19061	637.381	4.1962
36.4408	1.30369	463.832	4.14436
36.4515	1.67358	638.923	3.80105
36.4515	1.33426	599.854	4.09824
36.4568	1.38164	426.353	9.11574
36.4843	1.16153	822.124	3.63043
36.4889	1.09581	540.412	3.4216
36.5301	1.04384	1106.73	3.54858
36.5607	1.78818	538.438	5.28804
36.5905	1.26851	721.821	2.75982
36.8014	1.55579	767.825	3.80388
36.8473	1.1844	631.405	4.97598
36.8778	1.05296	602.005	3.95776
36.9252	1.14617	891.746	2.63031
36.9504	1.91034	237.579	3.84245
36.9703	1.12783	415.832	4.27264
36.9764	1.45488	552.567	5.80941
36.9955	0.803833	1307.76	5.37527
37.039	1.09725	678.064	3.4302
37.0826	1.04376	879.235	4.57433
37.1766	1.50986	551.54	3.03239
37.2935	1.29282	462.318	4.29569
37.3026	1.60764	489.684	4.00368
37.308	0.887845	1401.08	3.64503
37.5494	0.945875	2138.3	4.56124
37.5555	1.21636	494.727	3.99514
37.8184	1.50207	667.601	4.72073
37.8329	1.10934	948.078	3.4982
38.0109	1.63038	2214.57	4.90734
38.1086	1.05887	1286.71	3.50547
38.1316	0.944263	3123.39	4.70534
38.2439	1.48364	453.797	3.34761
38.2507	1.05121	670.577	4.36938
38.2599	1.18108	602.909	2.81707
38.4096	1.56916	412.704	3.88025
38.4708	1.12298	661.195	3.95889
38.5036	1.7907	342.045	4.68536
38.5258	0.993097	1705.67	1.97618
38.913	1.35972	877.218	3.75929
39.1063	1.53385	430.81	2.83583
39.3606	1.23894	1383.95	4.92535
39.4699	1.66515	762.575	3.95538
39.8166	1.35189	1541.44	5.76259
39.8563	3.40977	174.488	3.71856
39.9648	1.11509	967.505	4.54326
52.3031	2.34798	369.887	3.99388
52.6271	3.74764	281.741	4.44004
52.8214	2.24564	386.103	3.21353
53.0394	2.80511	135.267	3.01491
53.2574	3.18465	335.402	4.66065
53.403	2.1311	585.712	4.1646
53.6903	3.09297	196.378	3.16179
53.8503	1.3581	744.685	13.9183
53.8633	4.5687	169.547	3.53433
54.0347	2.40985	372.013	3.63233
54.0363	2.31534	424.434	4.62082
54.0843	3.13089	107.202	5.1337
54.2466	1.25284	608.053	11.8661
54.3906	2.49051	308.952	7.40823
54.4348	2.46458	261.025	3.21979
54.5224	2.54838	308.88	2.76593
54.7007	2.83792	220.918	3.65085
54.8143	2.39584	169.89	2.89326
54.8989	2.48879	718.043	2.96249
54.9415	2.10925	775.142	6.35395
54.9415	2.1123	268.813	3.47187
54.9644	2.24794	294.656	4.15325
55.0215	2.74328	284.181	3.70635
55.097	3.26148	207.865	2.57917
55.1213	3.86661	302.997	3.98203
55.2372	1.99485	456.567	3.24794
55.2417	2.80415	345.849	4.0201
55.2669	2.46731	275.303	4.41554
55.3156	1.29073	1423.61	3.58292
55.3598	2.81477	183.21	3.59462
55.3972	2.50689	334.805	4.99149
55.4406	2.77206	273.655	3.87362
55.5831	2.8543	300.099	3.3252
55.6158	2.64549	189.614	2.39893
55.727	3.13161	212.793	3.91912
55.7377	2.59209	448.95	3.14497
55.7651	2.47169	326.934	3.02457
55.7697	1.87582	323.286	3.90283
55.8017	1.57103	504.082	5.52861
55.9609	2.16073	282.204	3.39639
55.9967	2.89984	380.846	3.43293
56.0005	1.37136	912.102	4.61071
56.0051	2.75505	171.022	3.4479
56.0059	2.27806	457.01	3.97844
56.0226	2.50055	302.379	4.98994
56.092	2.52033	848.381	4.36446
56.1087	1.97629	242.323	4.18981
56.1163	2.82968	203.664	3.9895
56.1301	1.68981	502.699	13.9244
56.1979	2.6422	259.26	3.86804
56.2245	2.3115	525.941	6.79331
56.2771	3.36452	328.353	3.63485
56.37	2.63756	212.171	2.91429
56.3883	2.21697	619.186	3.13103
56.399	1.99906	222.259	4.25093
56.4455	3.21204	170.083	5.59746
56.4675	2.06152	690.507	2.99401
56.4713	1.66991	367.268	4.18021
56.479	2.95295	175.525	3.16452
56.5163	1.90608	588.342	2.83342
56.5209	1.73237	441.429	5.57941
56.5361	2.94226	599.312	9.80352
56.5582	2.64967	370.12	12.29
56.645	1.72624	356.896	5.45536
56.6481	2.12393	301.463	3.48278
56.6907	5.34551	136.055	5.27715
56.7646	2.09189	289.94	5.23036
56.7875	2.21683	205.177	3.24777
56.805	1.43366	702.026	4.81455
56.8149	2.21073	228.748	11.0098
56.8347	2.01721	372.33	4.76957
56.8819	1.81608	986.109	5.59587
56.8918	1.85111	867.965	2.97939
56.933	2.24726	344.369	3.44529
56.9353	2.76075	282.982	4.18389
56.9459	2.18935	447.857	2.9285
56.9528	2.52914	304.321	4.75898
56.9794	3.28796	127.912	3.57316
56.9886	2.31428	390.255	3.49759
56.9909	2.40266	288.023	3.21477
57.0114	3.867	301.675	4.05049
57.0122	3.97367	217.051	3.41825
57.0518	1.36657	1040.22	5.43405
57.0716	1.64842	547.675	3.85955
57.083	1.9699	646.109	9.48926
57.0952	2.80944	177.117	4.89313
57.0975	3.18123	76.9724	4.62856
57.1165	2.05826	295.852	6.03985
57.1173	3.26046	422.1	4.85159
57.1371	1.493	381.588	4.2396
57.1432	1.5448	784.871	15.648
57.1447	2.21823	366.175	5.01439
57.2026	1.94396	543.468	4.81786
57.2064	2.75301	165.109	4.82124
57.2612	2.80785	145.877	3.95731
57.2856	2.29894	1064.74	2.60348
57.2955	2.55948	340.557	3.5275
57.3161	3.27408	84.6149	3.71568
57.3763	3.09272	245.12	3.35145
57.4898	2.46493	392.393	4.64521
57.5019	2.38266	393.913	5.84618
57.508	2.55482	316.316	3.61382
57.5187	2.30799	411.78	2.42833
57.5575	2.45119	196.381	3.61101
57.5644	2.27598	718.086	9.32533
57.5659	2.73153	594.862	5.52061
57.5842	1.69552	552.94	8.17011
57.6284	2.59286	121.761	6.71432
57.639	1.793	801.384	2.88661
57.6497	3.42932	271.438	5.1375
57.6558	1.84023	195.257	5.44965
57.671	1.94839	831.87	14.5131
57.6977	2.8945	220.083	3.82423
57.7007	2.12359	325.374	10.704
57.7137	2.67053	337.736	4.55704
57.7198	2.64462	409.111	4.23911
57.7243	3.53898	376.727	3.73592
57.751	2.39628	254.849	3.05402
57.754	2.26372	311.92	3.8059
57.7617	2.0672	532.054	12.5183
57.7769	2.60499	325.232	8.54378
57.7784	3.04225	208.464	2.69974
57.8073	2.03366	187.471	3.51548
57.8272	4.91941	550.353	10.1318
57.8531	1.98642	733.062	32.2351
57.8904	2.87308	353.617	6.28314
57.8972	2.04278	321.869	4.99141
57.898	2.85175	279.82	4.81143
57.9315	2.17683	595.607	9.64349
57.946	2.18749	503.525	3.67917
57.9467	1.70913	363.238	8.17212
57.9475	2.29718	537.381	7.82834
57.9779	1.97572	409.645	3.56367
57.9802	2.2667	261.23	3.24504
58.0236	1.99246	275.047	3.77665
58.032	2.17527	761.197	15.1392
58.0648	2.08081	349.008	5.10754
58.0731	1.36635	459.458	4.12297
58.0846	2.68256	293.441	3.03225
58.0891	2.72827	172.635	5.73248
58.0968	2.1006	552.986	3.66829
58.1089	2.26818	459.527	4.91297
58.115	2.809	193.283	3.5601
58.1326	2.29558	396.882	12.1508
58.1699	3.08168	231.163	4.10666
58.1981	2.29709	390.029	3.41426
58.2293	1.81569	406.518	5.87483
58.2308	1.90404	1010.37	6.59099
58.2468	3.13344	291.73	3.44555
58.2628	2.24222	349.29	4.87539
58.2727	2.05941	497.198	6.16037
58.342	1.88878	382.897	6.99973
58.3534	1.6679	420.928	4.40937
58.3618	1.67094	982.813	4.73829
58.377	2.23152	713.702	4.97057
58.4136	3.18516	300.014	3.47534
58.4219	2.41888	242.692	4.09123
58.4318	2.72964	236.99	5.221
58.4379	2.41125	529.277	7.09868
58.4455	1.63131	740.717	3.8905
58.4577	2.10201	363.599	3.99596
58.4593	3.28568	209.202	3.54211
58.4638	3.71377	98.7487	3.39615
58.4791	2.26347	203.353	3.84081
58.4798	2.58795	162.173	3.71591
58.5156	1.49268	1257.72	11.2126
58.5187	2.05324	942.856	11.8201
58.5803	1.78361	738.083	7.05197
58.5857	2.3853	210.397	6.62045
58.5918	2.41576	269.546	3.66988
58.5941	2.64274	152.901	3.38272
58.5971	1.43935	598.026	15.5348
58.6017	1.93135	275.122	6.83583
58.6085	2.35178	229.687	4.39139
58.6184	2.37005	486.69	3.10375
58.6238	1.50485	1013.78	21.6261
58.6397	2.03493	364.416	12.1276
58.6466	2.20705	498.749	5.82
58.6527	2.19791	384.619	5.60609
58.6641	3.51257	159.183	3.46778
58.7212	2.94584	149.668	4.11693
58.7433	3.60546	166.899	3.57066
58.7585	1.94197	550.338	8.56699
58.7928	2.50252	893.259	12.5402
58.8324	3.07069	415.767	4.00311
58.8423	1.75917	495.987	2.98301
58.8492	2.29838	493	3.02812
58.856	2.24659	1256.97	23.6923
58.8644	2.00134	365.985	6.07557
58.8682	2.05923	310.21	8.26578
58.8773	2.55732	191.698	4.38774
58.8948	2.44612	244.406	5.47899
58.8994	2.84978	237.44	3.83128
58.9085	2.06835	206.88	3.10464
58.9261	3.4713	554.022	5.47588
58.9672	3.60076	231.076	4.78803
58.9794	2.29377	294.194	3.30576
58.9984	2.01806	668.279	5.53824
59.0258	3.24121	220.798	9.11794
59.0365	3.00358	300.306	2.79511
59.0479	2.86191	453.265	6.16064
59.0707	2.02108	576.777	6.54971
59.0715	3.25643	189.381	3.79423
59.1157	2.67604	150.823	4.35933
59.1751	2.4125	356.258	8.04397
59.2078	2.38354	260.726	3.72015
59.2185	4.50093	140.802	3.4066
59.2474	1.24883	803.95	15.2495
59.2573	2.25102	362.687	3.92406
59.2664	2.30432	332.178	8.15887
59.2976	2.45663	417.314	3.95327
59.3243	2.52211	715.443	3.59346
59.3449	3.27457	591.99	6.13757
59.3685	2.73838	174.693	4.13861
59.3723	2.21137	551.039	16.054
59.402	1.65849	964.001	16.0649
59.4309	1.57167	802.429	3.07837
59.4446	2.12911	401.034	6.37682
59.4492	3.14352	227.482	4.57651
59.4545	1.82144	1423.11	11.1991
59.4667	2.01639	795.336	3.43516
59.4766	1.9646	614.759	13.0339
59.5002	1.63561	1186.18	7.41986
59.504	2.60581	218.993	5.96719
59.5337	2.80533	409.369	7.77986
59.6182	2.24175	586.83	5.17239
59.6235	1.60817	605.29	8.88477
59.6456	3.52574	270.704	4.85759
59.7355	2.97279	764.337	4.75218
59.7636	2.44883	339.617	4.21518
59.8184	4.02678	129.254	3.25533
59.8314	2.50973	366.033	4.9071
59.8839	2.6346	423.043	5.01492
59.9745	2.84017	311.736	4.25638
60.0256	1.38726	2135.36	2.0607
60.0644	3.9002	515.124	16.1224
60.1032	3.11578	259.695	2.5915
60.1474	1.71312	1033.85	7.50312
60.1809	1.60042	1262.05	14.729
60.209	3.90925	164.046	2.82346
60.2509	1.94	1252.9	12.7111
60.2524	12.9825	262.779	3.42265
60.2646	2.27656	412.54	9.76348
60.3278	2.49887	329.602	3.08737
60.3308	2.01764	457.682	9.20589
60.3765	3.25424	190.376	6.5183
60.4153	3.8543	142.123	3.72207
60.4709	3.23135	187.747	3.21227
60.5158	2.94501	169.478	3.3883
60.525	2.02824	659.556	9.00006
60.5257	2.84145	239.139	5.92171
60.6293	2.00232	214.707	3.4307
60.694	3.71402	332.101	5.81836
60.7678	2.71952	144.302	4.07588
60.8447	3.91344	135.772	3.03251
61.0472	1.66568	673.195	10.1233
61.1393	1.98694	277.226	6.5278
61.1675	1.61388	947.798	3.975
61.2055	4.18734	145.73	3.60136
61.2063	3.32997	496.639	3.71999
61.2398	1.89554	701.384	10.9754
61.2603	2.75433	489.112	7.29275
61.4849	3.59326	132.294	4.58161
61.5526	1.90611	714.031	13.0127
61.6036	1.66705	1120.76	3.0999
61.615	3.99368	204.943	3.38892
61.66	2.63844	264.458	5.35528
61.7186	4.46721	201.581	5.43588
61.9378	2.43126	342.06	6.92309
62.1037	1.72782	1213.07	5.27277
62.1235	1.52839	1647.97	2.26635
62.1478	2.13278	752.021	6.45375
62.2331	1.74606	514.742	1.78796
62.2711	4.29324	159.88	4.5395
62.332	3.17713	143.079	3.24566
62.4682	1.77035	1179.12	21.0365
62.5984	3.83168	354.635	2.98667
62.7491	2.73238	469.803	3.79541
62.7788	2.06406	547.216	11.562
62.9333	7.96411	111.042	4.71297
63.0177	2.31669	268.817	2.70345
63.6569	1.71067	935.682	1.41299
63.7361	2.50821	682.873	7.79157
64.0541	2.40307	281.045	2.17881
64.185	1.5766	1494.76	7.31921
64.6788	2.61437	502.804	11.838
64.821	2.77564	288.167	5.5054
65.1687	2.32503	314.144	2.9341
65.1786	2.16526	683.339	5.84186
65.2684	2.14392	710.201	1.67546
66.077	2.72336	609.289	3.06416
66.3508	2.98039	498.278	6.82247
66.4778	2.99251	620.481	1.91773
66.4968	4.41672	266.77	3.91607
66.6763	2.08412	531.634	2.2828
66.6847	2.84178	614.063	2.04989
66.7098	2.61964	505.043	2.90235
66.7235	2.39141	527.946	2.36486
66.9577	2.01405	396.997	2.24863
67.1091	2.41715	465.507	4.71706
67.4893	2.97377	373.812	4.17412
67.8688	3.02836	316.69	2.0959
67.9585	1.86315	927.137	2.07289
68.2794	2.58705	410.164	2.28034
69.1712	2.70684	542.352	2.1529
69.3674	3.04592	844.159	2.25588
69.7407	3.19173	390.065	3.04404
69.746	2.97273	605.544	1.90392
70.2743	2.22892	1099.09	15.7805
71.4448	2.61923	424.548	2.48206
89.4659	2.76656	304.133	3.85334
90.0092	3.5122	490.119	3.82529
90.4632	2.79645	815.077	5.96463
91.4406	2.67781	473.052	4.01855
91.6489	2.50192	400.213	2.06781
91.9247	3.39748	336.889	3.70588
92.0709	2.86698	518.669	2.5637
92.099	2.59267	734.904	2.61347
92.2179	3.98233	586.244	6.12995
92.3133	3.80041	275.18	3.27897
92.3164	3.6428	328.379	4.50956
92.3277	2.55318	401.277	5.53152
92.3694	3.06537	573.749	3.5061
92.7118	5.25812	157.94	4.04843
92.8201	2.42267	476.983	3.48746
92.8694	3.46669	399.071	4.5062
92.9103	3.31211	418.059	2.78332
92.9322	3.21209	865.608	3.5384
92.936	3.08328	480.327	3.22937
93.361	3.32401	375.549	2.76268
93.4996	2.97392	588.568	2.96154
93.5465	3.10269	421.451	3.36969
93.9373	4.14946	1486.63	3.65209
94.0812	2.77065	556.907	5.28411
94.1123	4.64634	433.841	4.82782
94.1569	2.49943	912.054	2.07165
94.5659	3.1431	322.752	3.02493
94.7007	3.49752	525.781	2.79171
94.7014	2.65525	843.506	2.02843
95.3693	3.51231	328.113	3.06157
95.4382	2.7549	395.657	5.02773
95.5722	2.65489	564.3	2.12953
95.6192	2.85026	275.139	4.40879
95.8607	2.8865	425.424	2.30148
95.9698	2.62595	473.856	4.56484
95.994	2.73347	675.879	4.01568
96.0985	2.91215	385.732	3.02086
96.399	2.75147	280.556	5.15089
96.4376	3.46327	325.947	5.84838
96.7155	2.821	473.255	2.66375
96.8441	3.19196	596.635	5.65462
96.8729	3.48575	1088.3	5.917
96.9009	2.69069	1036.21	3.42908
97.7858	3.61245	497.351	4.73177
98.0242	3.46544	640.618	4.22234
98.0878	3.50176	632.898	2.14188
98.2748	4.01797	283.034	2.52248
99.2003	3.22713	457.422	5.89288
100.281	3.08128	580.031	3.32251
100.736	3.10378	408.458	2.71262
101.131	3.11267	389.066	3.58347
101.146	3.87694	426.766	2.8399
106.072	3.77114	399.21	1.81313
106.71	3.13113	797.756	1.9201
122.428	4.73156	302.384	2.59958
188.284	6.56061	223.489	1.90616
188.443	6.36928	507.708	2.85956
193.089	6.31695	187.412	2.29602
195.233	7.18609	219.074	2.44184
195.495	5.08096	268.114	3.54936
219.279	8.41985	883.15	3.4307
332.622	10.7008	307.757	2.13887
343.514	11.4644	288.895	4.05344
344.183	12.3864	245.27	2.85191
354.079	9.34029	390.416	4.17364
385.055	9.94751	282.279	3.60716
410.713	9.55009	316.557	1.55958
411.884	10.2049	631.713	1.13865
416.176	11.581	352.615	1.68917
418.72	13.5401	398.264	2.02632
421.49	11.4303	856.877	1.79893
423.485	14.2648	303.449	2.57044
424.716	12.2109	106.782	3.32418
540.257	13.8954	478.616	1.15237
578.283	18.1903	170.317	2.20254
945.778	19.6657	302.023	8.68626
960.653	26.3212	210.338	10.8505
1119.71	22.4962	240.792	3.831
1732.45	23.2528	218.021	3.00772
1756.8	31.2507	117.409	1.94745
1811.26	32.4888	89.0712	1.93559
1955.17	31.7667	183.984	1.61168
2020.85	25.2931	272.588	1.49348
2612.74	43.1686	40.4207	1.07884
2688.43	25.6266	269.977	2.11392

## Sheet: Eastern Alaska Range
AGE	± (1-s)	Uconc	U/Th	Conc
33.4645	2.67447	177.173	4.44736			184
33.5455	1.31956	811.329	2.09138
33.8987	1.95253	287.975	2.77844
34.4047	1.80407	315.36	3.06064
34.5655	0.900517	219.296	3.79654	NA
34.6808	0.959891	123.091	4.09801	NA
34.8123	0.712183	621.931	2.59717	NA
34.9719	1.12053	748.128	2.55313
35.0764	0.996523	272.028	3.85177	NA
35.6086	1.57902	506.4	5.12897
35.8607	1.07605	604.275	1.69284
36.398	1.44126	1010.38	1.88976
36.4142	0.915716	373.616	5.33158	NA
36.5564	1.0826	408.088	2.94951	NA
36.5997	1.76371	531.538	2.80631
36.705	0.636278	1186.6	2.69574	NA
37.402	1.33253	922.397	4.21242
37.4709	0.797234	517.241	3.96102	NA
37.7391	1.63664	528.053	3.98531	NA
38.0536	0.666492	340.63	3.16031	NA
38.4348	1.21772	663.596	4.47393
39.0704	0.992193	1024.83	2.98475	NA
39.4332	1.33517	2647.26	1.23148
40.562	0.9532	623.13	7.25794	NA
45.6661	2.12175	420.113	5.14432	NA
45.8024	1.35081	446.951	2.35616	NA
49.061	3.76882	262.829	3.92804	NA
49.8093	2.99568	218.723	5.32056
50.1814	3.76279	89.0156	4.90173
50.2805	2.3716	278.81	3.86923
51.4958	2.44435	132.844	5.54715
52.0943	1.68477	1247.38	2.646
52.401	1.0678	646.636	4.28191	NA
52.4266	1.8219	322.215	4.62461
52.4434	2.08263	404.318	2.94807
53.4528	1.10355	2758.29	15.0486	NA
53.7048	2.40236	170.694	5.02181
54.3563	1.80459	634.305	4.57146
54.7622	1.16977	552.903	2.93392	NA
54.905	2.15499	558.346	4.19632
55.2631	3.38944	989.703	2.46288
55.3248	1.99025	925.547	2.59123
55.8413	1.61521	2048.19	2.36864
56.0447	1.40182	2001.85	3.17532
56.1888	1.5117	484.54	3.39386	NA
56.3274	1.71718	2075.26	4.22992
56.5001	1.6993	1139.42	5.00206	NA
56.5277	2.19254	1956.02	3.85263
56.6446	1.20128	96.9182	4.29002	NA
56.6641	2.02184	696.109	4.60715
56.6991	1.61652	1340.07	3.44663
56.9848	2.0903	2195.79	3.61081
57.0694	1.53142	135.909	3.97375	NA
57.4837	1.7382	2252.58	2.23033
57.4919	0.98001	614.498	4.5744	NA
58.0731	2.16764	938.344	1.85787
58.1866	2.26053	370.159	3.75986
58.2163	1.83855	1584.02	4.21052
58.2498	1.39004	1561.65	25.3509	NA
58.2949	1.3359	628.367	2.26632	NA
58.4463	2.81038	257.749	4.23675
58.4684	1.46746	1002.5	3.50819	NA
58.5103	1.68157	954.941	5.016
58.6601	1.54327	431.701	3.8419	NA
59.2941	1.03051	314.101	4.36448	NA
59.9408	1.19507	1206.62	4.09956	NA
61.5671	1.96244	489.93	6.85782
61.8556	2.55767	340.13	4.64832
61.9545	2.88193	563.463	3.81496
62.3258	1.40015	656.115	10.5701	NA
63.1327	1.62475	479.577	4.61219	NA
63.9101	1.39532	572.773	7.15884	NA
63.9194	1.9526	1139.48	2.96798
63.9505	1.86831	976.738	5.94716	NA
63.9879	2.2798	1046.18	5.20152
64.3927	1.93114	831.869	3.29964
64.5522	1.99326	449.173	4.49477	NA
64.7978	0.97604	1343.13	13.7652	NA
65.3368	2.24281	1127.01	4.39133
65.677	1.34066	525.917	34.0455	NA
66.4732	2.12069	3174.83	7.01394
66.5014	2.1998	1210.39	4.43915
66.6595	1.68695	900.675	62.9833	NA
66.8649	3.17033	766.712	3.55847
67.1195	2.17983	348.182	8.61304	NA
67.5114	3.32519	235.636	2.04024
67.9051	2.05114	385.7	47.2932	NA
68.4035	5.73175	3070.43	4.85144	NA
69.7082	2.93186	1655.14	1.8859	NA
70.0726	2.31941	410.028	4.61009	NA
70.646	2.41886	534.692	4.27407
70.8398	2.33211	526.007	4.21713
72.9858	2.39215	280.431	5.73812	NA
73.2982	3.0091	357.802	6.42121
75.3531	3.52476	210.662	5.50675
88.98	2.77132	706.996	3.69192
89.6485	2.94841	381.614	3.19114
89.7372	4.90876	538.538	7.87894
90.3023	2.35394	488.722	4.33965	NA
90.548	3.36184	443.3	3.77652
91.0034	3.98612	588.798	3.97074
91.0277	2.99325	500.732	5.294
91.3684	2.20325	244.047	5.82735	NA
91.3823	3.37958	537.755	3.74443
91.6414	2.74138	562.67	3.39354
91.7311	1.63658	918.629	3.44601	NA
91.7512	4.49646	244.671	3.87523
91.8207	1.65164	673.668	5.33754	NA
91.9573	3.64299	342.032	5.22425
92.0528	4.66601	680.284	4.13742
92.0776	1.92467	571.315	3.88741	NA
92.1387	2.36663	247.699	4.29769	NA
92.1724	2.83512	478.032	4.09534
92.1726	2.18126	481.471	2.72498	NA
92.3517	1.73582	713.293	8.11867	NA
92.5194	2.29853	2663.03	2.37995
92.5239	2.84101	434.619	5.69069
92.5793	3.35017	292.626	5.37564
92.7618	3.3819	753.742	4.31203
92.861	3.55762	509.138	5.13508
92.9342	2.15005	270.68	5.17265	NA
92.986	3.43936	469.319	5.69539
93.0928	2.35136	478.544	3.76378
93.0974	2.06903	435.107	6.03854	NA
93.1915	2.06084	338.923	3.94404	NA
93.3237	2.393	882.095	5.15194	NA
93.3413	3.18006	1095.28	4.85689
93.3837	1.94748	542.409	6.74802	NA
93.3937	2.28205	460.531	4.95557	NA
93.4178	3.24518	391.856	5.92737
93.4299	3.46792	417.912	3.792
93.4974	2.2395	1573.13	3.37207	NA
93.57	2.89662	830.349	3.99546
93.6873	1.50443	533.6	3.60935	NA
93.8848	2.0017	284.915	3.96859	NA
93.9843	2.74645	740.613	2.53387
94.0634	2.01573	555.57	3.97581	NA
94.0744	2.99941	782.64	4.5552
94.0842	3.66301	550.272	3.92068
94.3107	2.91901	455.984	4.35802
94.3163	1.31504	446.921	4.2336	NA
94.3183	4.12345	404.99	5.72914
94.3409	1.94751	334.443	4.99297	NA
94.3735	4.02948	1264.56	2.67369
94.5015	2.34023	476.498	4.65676
94.5409	2.98556	639.621	3.97939
94.608	2.23385	149.621	4.91878	NA
94.6492	3.52483	425.763	5.45869
94.6691	1.60604	268.076	7.94213	NA
94.7052	3.25817	530.973	4.23882
94.8082	4.16406	400.007	4.46448
94.8415	3.42777	904.52	4.2921
94.9243	2.12093	408.105	5.00987	NA
95.0801	2.75243	151.256	6.02937	NA
95.0892	3.31856	544.901	5.73165
95.227	2.84135	593.52	5.77899
95.3966	3.48503	355.628	5.15979
95.4355	1.73728	243.465	4.85958	NA
95.4357	2.07429	428.244	4.63009	NA
95.4359	1.97531	328.582	6.34351	NA
95.5117	3.55313	522.039	3.91019
95.5723	2.58066	351.928	4.69911	NA
95.8085	3.09857	1127.09	5.12279
95.9686	2.52729	285.684	5.02741	NA
96.3307	2.28997	198.347	4.64571	NA
96.3869	2.67878	1435.53	5.3669
96.5138	2.28388	149.757	5.3315	NA
96.5898	2.72414	1546.5	2.489
96.7782	2.67842	227.671	5.07156	NA
97.0075	1.91768	297.731	6.44557	NA
97.5276	1.75468	307.346	4.80453	NA
97.8391	1.70297	1822.68	7.34129	NA
99.7755	1.87305	320.537	4.53301	NA
100.652	2.65757	472.839	4.89331	NA
100.711	2.18951	215.261	5.47175	NA
101.922	1.55351	1103.41	5.0436	NA
108.702	3.2095	248.255	4.79412	NA
117.208	5.91913	183.036	3.34338
146.8	15.7481	114.236	6.39134
164.417	9.09604	148.888	3.21998
165.44	5.72213	129.155	2.73752
167.466	6.12787	86.568	2.75596
197.031	23.0619	175.714	7.50959	NA
198.299	3.42654	394.838	4.84069	NA
332.513	17.753	524.999	6.74825	NA
691.898	14.7055	128.927	1.36904	93.4896

## Sheet: Chugach Mountains
AGE	± (1-s)	Uconc	U/Th	Conc
57.0169	1.23465	539.494	2.57817	NA		914
57.0679	1.35434	363.354	2.57762	NA
57.1994	0.988581	573.119	4.99109	NA
57.246	1.4008	193.688	2.38861	NA
57.2822	1.27557	270.803	3.88674	NA
57.3696	1.50852	139.66	4.32415	NA
57.4175	1.40733	480.75	4.42687	NA
57.6405	1.80341	144.927	2.64605	NA
57.6996	1.73006	206.784	2.82662	NA
57.7039	1.3846	239.849	4.0934	NA
57.8486	1.47032	420.842	4.10299	NA
57.9773	1.95943	346.332	2.52409	NA
57.9788	1.41315	101.312	3.00659	NA
58.206	1.29466	190.354	2.84865	NA
58.2404	1.52528	114.907	3.81995	NA
58.27	1.74698	138.677	4.16579	NA
58.3019	1.3572	664.926	2.20429	NA
58.353	1.48409	210.877	3.58569	NA
58.4336	1.46276	348.42	2.63724	NA
58.4451	1.32658	517.875	4.9267	NA
58.5407	1.49459	426.16	2.08633	NA
58.5951	1.79634	280.288	2.85439	NA
58.8082	1.14773	578.682	3.72704	NA
58.8665	1.42045	439.547	2.77948	NA
58.8787	1.46334	396.557	3.12361	NA
59.0055	0.983437	483.853	3.56116	NA
59.0235	1.37298	204.75	2.35868	NA
59.0872	2.16868	204.834	2.46811	NA
59.1051	1.30762	468.487	3.33622	NA
59.1306	1.39372	186.699	4.45832	NA
59.1624	1.76803	282.722	3.38803	NA
59.179	1.09631	212.961	1.75145	NA
59.2007	1.19761	536.802	4.85808	NA
59.306	1.37989	458.883	6.55811	NA
59.5211	1.5792	367.472	3.79577	NA
59.5978	1.87399	162.438	4.0236	NA
59.6762	1.21337	158.672	3.85442	NA
59.7499	1.67438	385.006	2.57666	NA
59.8447	1.59402	314.842	2.36259	NA
59.8592	1.45094	323.402	4.37272	NA
59.9074	1.58662	169.442	2.68616	NA
59.9943	1.31637	309.497	2.70081	NA
60.1444	1.55984	394.832	2.58983	NA
60.149	1.6148	320.66	3.58413	NA
60.151	2.50788	823.168	2.01128	NA
60.2205	1.49554	193.34	2.37598	NA
60.2708	1.97597	915.057	1.87266	NA
60.3506	1.12813	781.217	3.80093	NA
60.4316	1.66086	198.99	2.129	NA
60.4321	1.32469	452.158	4.31429	NA
60.4607	0.988263	755.411	6.10318	NA
60.4785	1.26571	996.092	4.83237	NA
60.4976	1.44689	250.761	2.571	NA
60.625	1.82943	184.656	2.57162	NA
60.6302	1.56228	334.963	3.1117	NA
60.6349	1.84537	140.714	3.47008	NA
60.677	1.25017	232.12	4.63857	NA
60.8161	1.38499	263.193	2.38583	NA
60.8326	1.96758	590.867	3.91498	NA
60.8575	1.81643	273.506	3.10562	NA
60.8994	1.5679	118.422	4.68893	NA
60.9363	1.77118	320.48	2.89383	NA
60.9763	1.37435	143.13	3.27806	NA
60.9826	2.14375	212.484	2.38104	NA
61.0496	1.32614	512.535	4.89944	NA
61.1365	1.39343	464.204	4.10634	NA
61.1695	1.9683	156.218	3.21263	NA
61.6455	2.00533	116.58	4.73962	NA
61.7887	1.6332	145.722	3.48529	NA
61.8207	1.55604	404.54	6.90906	NA
61.8289	1.40272	269.746	4.84358	NA
61.8703	1.07988	152.507	2.17431	NA
61.9008	1.61162	176.618	6.10199	NA
61.9011	1.61566	449.608	2.03459	NA
61.911	1.64639	497.906	4.13262	NA
61.9536	1.14466	982.192	7.62601	NA
61.9559	1.76483	226.789	2.61497	NA
61.9742	1.71709	159	2.68341	NA
62.0823	1.32084	626.343	3.71012	NA
62.1291	1.09903	425.949	4.23861	NA
62.1803	1.44766	359.409	4.487	NA
62.2111	2.6863	202.724	2.50079	NA
62.2273	1.3654	541.234	3.96164	NA
62.3464	1.54199	284.256	2.42737	NA
62.3706	1.66882	780.973	5.34132	NA
62.3731	1.63073	272.126	1.84624	NA
62.388	1.81269	332.847	4.90945	NA
62.4221	1.63624	661.204	2.91705	NA
62.432	1.56674	572.346	3.67996	NA
62.438	1.22668	344.451	4.58973	NA
62.4779	1.21264	799.519	6.68943	NA
62.7512	1.24332	1253.01	5.02981	NA
62.7581	1.27956	497.841	3.9537	NA
62.9607	1.3534	201.823	3.72267	NA
62.9625	1.70668	412.013	4.57904	NA
62.9791	1.45786	663.133	2.07734	NA
63.0185	1.71467	187.766	2.36539	NA
63.0682	1.14345	588.969	2.47885	NA
63.0935	2.50964	365.127	3.22288	NA
63.1315	1.47641	394.767	2.88934	NA
63.1353	1.75388	564.135	2.15676	NA
63.1613	1.83064	590.798	3.51852	NA
63.1688	1.1719	1725.83	2.52656	NA
63.2597	1.57541	231.891	3.91109	NA
63.4549	1.50328	593.996	8.76995	NA
63.5067	1.38365	1461.21	7.30059	NA
63.5659	2.06462	497.993	3.67525	NA
63.6798	1.45582	177.962	3.4581	NA
63.7183	1.33907	351.188	1.68179	NA
63.7775	1.92788	422.029	2.60277	NA
63.7867	2.31763	256.876	1.82481	NA
63.8127	1.48815	248.277	3.3964	NA
63.8759	1.40565	740.299	6.91602	NA
64.1577	1.44087	318.642	3.15054	NA
64.3466	1.91753	495.917	3.4294	NA
64.4533	1.42958	530.392	2.25063	NA
64.5223	2.06969	150.609	5.15659	NA
64.5802	1.6437	642.212	4.31396	NA
64.8439	1.41502	880.094	8.10763	NA
64.8891	1.27533	384.153	5.75518	NA
64.9399	1.58771	306.44	4.46141	NA
64.9637	1.51396	377.269	4.29745	NA
64.9701	1.62944	235.773	4.21945	NA
65.1495	1.29826	174.225	4.26546	NA
65.1793	2.17271	228.75	2.26053	NA
65.2068	1.74804	473.183	2.40138	NA
65.2092	2.40441	264.895	4.08233	NA
65.2267	1.14298	400.322	5.18093	NA
65.2445	1.42904	449.651	4.53988	NA
65.2536	1.35983	464.65	3.13968	NA
65.2935	1.30595	667.881	2.38742	NA
65.3513	1.46699	278.919	2.98797	NA
65.3693	2.3141	635.35	5.85172	NA
65.3979	1.68823	479.871	6.03342	NA
65.571	1.35765	267.199	2.72084	NA
65.7274	1.91199	203.12	13.0479	NA
65.8326	2.08531	125.381	3.70054	NA
65.8428	1.86088	116.522	3.16285	NA
65.8897	1.51792	374.013	4.69528	NA
65.9082	1.48493	129.971	3.01802	NA
65.9623	1.63078	408.013	4.7562	NA
66.0538	3.60603	131.857	2.14783	NA
66.0551	1.1147	670.184	6.94461	NA
66.0805	1.89084	295.058	2.06811	NA
66.2053	1.43824	168.007	4.84511	NA
66.2353	1.07064	329.218	4.45858	NA
66.3765	1.65294	620.121	3.72195	NA
66.4494	1.67606	249.125	3.83417	NA
66.4923	2.16631	398.799	2.75938	NA
66.5479	1.44416	1090.72	5.73782	NA
66.6217	1.69062	491.93	3.87241	NA
66.7158	2.13437	568.142	2.34859	NA
66.721	1.65029	732.558	3.83812	NA
66.7483	1.90533	325.591	3.89998	NA
66.7698	1.16796	197.055	5.36885	NA
66.7912	1.62607	192.911	6.69269	NA
66.7913	1.57817	748.078	6.58187	NA
66.8238	1.53989	867.881	2.43799	NA
66.9527	1.96936	374.507	6.19866	NA
66.973	1.9049	260.481	6.54417	NA
66.9932	1.39494	377.496	4.80522	NA
66.9967	1.98163	221.808	4.86878	NA
67.0423	1.30005	463.737	7.04522	NA
67.1867	1.48855	721.151	4.30472	NA
67.2084	1.33144	507.536	7.87914	NA
67.2405	1.79294	170.211	4.89766	NA
67.2586	1.82496	206.812	3.59279	NA
67.5741	1.6099	802.697	1.78817	NA
67.698	1.76433	299.234	5.06131	NA
67.7193	1.68477	270.276	4.26828	NA
67.8553	1.71282	373.006	4.07252	NA
67.8926	1.80331	219.215	1.94924	NA
67.9789	1.35537	268.311	5.51753	NA
68.0677	1.42582	638.851	6.1811	NA
68.163	1.02703	378.953	4.18553	NA
68.2174	1.54217	580.641	4.14017	NA
68.4084	1.33749	824.853	5.13763	NA
68.4106	1.67396	380.092	4.76955	NA
68.4918	1.56288	188.206	2.31852	NA
68.5026	1.54629	235.369	5.17883	NA
68.5236	6.73758	748.82	3.72285	NA
68.5345	1.79948	540.089	2.09953	NA
68.5777	1.8529	277.924	3.71827	NA
68.6121	1.87335	144.523	1.94427	NA
68.6593	1.53693	349.455	4.13614	NA
68.6997	1.6921	246.944	3.31848	NA
68.7839	2.07412	307.552	7.37024	NA
68.796	1.45908	195.063	4.15845	NA
68.9219	1.65279	528.426	4.81438	NA
68.9534	1.43374	929.399	3.74114	NA
68.9603	1.5745	235.251	2.20642	NA
68.9784	1.94471	244.705	3.72544	NA
69.0156	1.70669	609.842	4.75355	NA
69.024	2.22829	271.402	3.84142	NA
69.108	2.06158	225.772	2.99145	NA
69.1215	1.40051	774.442	9.78011	NA
69.1553	1.61299	237.129	5.79127	NA
69.2076	1.41521	361.247	4.48298	NA
69.3517	1.562	378.957	4.40763	NA
69.3912	1.59996	714.617	4.9013	NA
69.3947	1.39455	516.92	4.30588	NA
69.4095	1.71088	122.55	5.00255	NA
69.4246	2.42477	35.646	3.46581	NA
69.4761	1.56481	329.955	3.74824	NA
69.5105	1.72304	224.883	4.85042	NA
69.5471	1.53263	619.827	2.59477	NA
69.6101	0.998459	477.798	7.95039	NA
69.6315	1.78584	243.5	3.35401	NA
69.6325	1.97896	284.796	3.18254	NA
69.6405	1.58493	497.246	2.66128	NA
69.6493	1.50682	346.452	5.88458	NA
69.6574	2.11633	268.062	4.00396	NA
69.6914	1.90379	309.332	3.9737	NA
69.7227	1.76231	429.501	9.36491	NA
69.7282	1.64042	497.001	3.39087	NA
69.852	1.77987	57.9956	3.74941	NA
69.9889	1.64137	303.92	5.52438	NA
70.0983	1.53818	258.884	2.87797	NA
70.1342	1.46213	399.269	3.72384	NA
70.2109	1.41056	461.698	4.26191	NA
70.2242	1.65417	209.853	6.75929	NA
70.2959	1.67247	416.499	3.70454	NA
70.3286	2.57043	2122.07	6.80188	NA
70.3654	1.87482	322.938	3.24556	NA
70.3694	1.19891	504.83	3.29424	NA
70.3915	1.56959	281.441	5.19203	NA
70.3934	1.65915	221.052	3.55141	NA
70.41	1.6973	372.879	5.85625	NA
70.4232	1.47514	195.602	5.07159	NA
70.4485	2.00925	1211.86	4.75517	NA
70.4633	1.36101	512.352	2.51314	NA
70.4993	1.91727	282.754	6.44835	NA
70.6213	2.07969	126.726	3.58152	NA
70.7607	1.27605	241.808	3.08725	NA
70.8154	1.84338	171.154	3.65443	NA
70.8181	1.60667	271.642	3.20927	NA
70.828	1.40013	572.826	5.31983	NA
70.8322	1.58964	149.028	3.28171	NA
70.8987	2.60265	353.342	5.17405	NA
70.9961	1.34235	134.455	4.06096	NA
71.0653	1.98746	384.321	2.72032	NA
71.0836	1.76128	418.092	3.25638	NA
71.169	2.4959	665.027	5.70112	NA
71.2037	2.09642	72.3443	4.8152	NA
71.2066	1.26733	305.322	3.03981	NA
71.2237	1.90929	157.91	4.34027	NA
71.2794	1.3366	453.511	3.24854	NA
71.2853	1.60072	144.933	2.03178	NA
71.2938	1.60699	364.814	3.12216	NA
71.321	1.33084	489.632	4.55653	NA
71.3509	3.98358	73.4602	2.20839	NA
71.3811	1.58552	308.898	6.2138	NA
71.4126	2.04655	650.331	4.16173	NA
71.4345	1.25722	511.797	5.60464	NA
71.4729	1.99472	375.501	3.29656	NA
71.4736	1.48376	187.586	4.3492	NA
71.4839	1.91953	235.86	2.62023	NA
71.525	3.4625	1037.8	2.50297	NA
71.5956	1.58152	52.7734	2.79903	NA
71.7386	2.10902	187.538	2.1491	NA
71.7656	2.40935	151.521	4.13477	NA
71.8073	1.88643	230.567	3.24635	NA
71.8156	2.78505	50.2254	3.27798	NA
71.923	1.86666	108.849	3.16526	NA
72.0007	1.8548	226.322	2.38473	NA
72.0609	1.76064	253.7	3.45936	NA
72.0693	1.61423	867.895	2.3285	NA
72.0714	1.43575	569.607	7.13566	NA
72.0764	1.49396	257.986	3.89616	NA
72.1218	2.54247	336.642	7.83166	NA
72.1558	2.60526	101.693	5.53049	NA
72.1709	1.63466	647.741	3.61835	NA
72.2025	1.44096	219.179	3.76334	NA
72.2063	1.39507	427.598	4.36619	NA
72.221	2.17447	173.053	4.90998	NA
72.2423	1.70983	241.281	2.01244	NA
72.2934	1.77238	241.199	2.99829	NA
72.3712	1.25074	1316.68	18.6644	NA
72.3895	2.07663	233.397	4.60039	NA
72.4308	2.22326	248.258	2.95531	NA
72.4592	2.03513	259.098	3.30744	NA
72.4609	1.16934	654.388	4.11503	NA
72.5335	1.70534	244.088	3.42737	NA
72.5355	2.2705	244.626	5.60247	NA
72.583	1.40322	1035.45	3.41459	NA
72.6171	1.44511	127.457	4.14735	NA
72.6842	1.56027	306.748	4.29955	NA
72.6925	1.73934	126.832	3.92635	NA
72.7523	1.96799	128.099	2.51043	NA
72.8247	1.94595	253.882	9.66235	NA
72.8587	1.60772	244.213	3.02025	NA
72.8772	1.4202	546.21	5.29974	NA
72.8944	1.56242	1003.9	6.0113	NA
72.9287	2.24866	120.336	3.65519	NA
72.9833	1.42701	493.609	2.59609	NA
73.0111	1.58106	212.378	3.55595	NA
73.0227	2.51745	182.829	3.18477	NA
73.0312	1.78227	175.771	1.6097	NA
73.0647	2.30929	198.171	4.47974	NA
73.0985	1.58459	243.535	5.25886	NA
73.2822	1.73852	318.528	3.76968	NA
73.3084	1.53461	379.527	3.73139	NA
73.3285	1.51349	237.213	2.60141	NA
73.3412	2.15695	647.12	3.22498	NA
73.3792	2.81663	217.253	6.53972	NA
73.3802	1.60586	508.868	3.88221	NA
73.3913	1.12874	911.778	5.535	NA
73.4303	2.93071	219.982	3.59344	NA
73.4654	2.35234	104.164	3.6306	NA
73.4764	2.37379	60.1117	1.30015	NA
73.5117	3.89168	165.328	5.60059	NA
73.5353	1.74892	167.466	3.51336	NA
73.5925	1.76512	421.939	5.55869	NA
73.5927	1.90123	228.613	2.35184	NA
73.5948	1.55492	427.9	2.72895	NA
73.6632	1.71719	220.232	3.24142	NA
73.6797	2.25829	349.921	5.9086	NA
73.7229	1.7438	129.341	4.07809	NA
73.7692	1.8958	281.553	2.83476	NA
73.7745	1.55032	811.358	3.13299	NA
73.8173	1.46546	1046.06	2.42063	NA
73.8535	1.22717	1018.04	5.6642	NA
73.9099	1.62368	178.555	2.96239	NA
73.9239	1.44039	451.54	2.91429	NA
73.9248	1.86828	213	3.17671	NA
73.953	1.81966	210.767	3.83194	NA
73.9979	1.58479	294.542	2.91691	NA
74.0066	1.54316	114.108	3.28766	NA
74.0124	1.56538	298.781	5.56497	NA
74.0324	1.79399	691.382	5.59413	NA
74.0338	1.96821	117.584	4.92442	NA
74.0358	1.79487	193.088	2.389	NA
74.098	1.58217	1401.64	3.29803	NA
74.174	1.18968	960.272	9.17358	NA
74.2088	2.05519	57.6402	3.04898	NA
74.2554	1.60956	368	5.26598	NA
74.261	1.91122	1590.1	3.60223	NA
74.2787	1.59448	367.991	3.40881	NA
74.3559	1.61503	250.33	4.65495	NA
74.3579	3.0892	593.201	7.69714	NA
74.3673	2.09942	167.965	3.03167	NA
74.3836	1.99275	135.098	5.89465	NA
74.4038	1.40427	714.384	5.46045	NA
74.4138	1.62105	299.279	3.95211	NA
74.5129	2.0547	125.263	2.75848	NA
74.519	1.69209	331.396	2.45515	NA
74.6012	1.70298	1595.24	7.60631	NA
74.6287	1.56153	487.468	2.31878	NA
74.691	2.19752	232.783	2.3283	NA
74.6956	2.23676	477.636	4.95135	NA
74.7929	1.51417	297.569	1.92413	NA
74.8156	1.89353	235.217	2.90937	NA
74.8974	2.38919	264.414	2.59967	NA
74.9168	1.79205	87.6689	2.50848	NA
74.9518	1.73677	492.314	5.83871	NA
74.9609	1.58247	188.662	1.84165	NA
75.1302	1.99914	269.38	2.89099	NA
75.1316	3.13117	655.061	3.62916	NA
75.1747	2.53592	44.2071	1.69665	NA
75.2261	1.42308	495.603	3.53473	NA
75.2941	2.11841	51.9569	2.42542	NA
75.3485	1.75994	314.394	2.84183	NA
75.3718	1.65173	183.42	4.17156	NA
75.4282	1.17118	1010.42	6.33898	NA
75.4454	2.25372	254.48	2.64618	NA
75.4565	1.97369	186.754	2.69316	NA
75.5109	1.53073	529.538	4.09073	NA
75.5168	1.61584	388.756	3.25327	NA
75.5171	1.93264	235.887	2.08964	NA
75.5577	1.87584	486.414	3.56602	NA
75.581	1.65312	310.654	3.36378	NA
75.6257	1.46169	145.451	3.17419	NA
75.6355	2.08807	365.098	2.5701	NA
75.6532	2.53583	180.755	4.94466	NA
75.6693	1.71031	256.731	3.00205	NA
75.7079	2.10049	314.034	3.10528	NA
75.7419	1.8115	124.575	4.59378	NA
75.7597	1.67237	79.2885	1.70845	NA
75.8078	1.95202	251.556	5.70057	NA
75.8266	2.12284	239.842	3.73902	NA
75.8452	2.01511	210.519	10.5385	NA
75.8572	2.08207	336.172	3.59614	NA
75.871	2.15076	1330.76	7.62963	NA
75.8999	3.54414	45.1055	2.82661	NA
75.9084	1.87682	163.555	1.72022	NA
75.9796	2.02417	458.496	3.36652	NA
76.0247	1.84312	440.055	5.56996	NA
76.0359	1.11404	409.328	4.19468	NA
76.0564	1.87169	380.85	2.50971	NA
76.0866	1.61084	395.085	3.33568	NA
76.0925	2.1414	177.148	3.27824	NA
76.1032	4.35114	346.712	2.62515	NA
76.1874	2.23512	266.281	4.53472	NA
76.2158	2.16629	425.683	3.32397	NA
76.3133	1.4258	412.471	7.27029	NA
76.3339	1.87695	203.706	2.4409	NA
76.3442	2.01607	687.314	1.60633	NA
76.4408	1.8171	330.95	2.47995	NA
76.4645	2.82696	56.7321	2.4492	NA
76.4727	1.67857	346.814	7.76857	NA
76.4779	1.7038	404.819	5.49372	NA
76.5706	1.88111	342.278	2.33372	NA
76.6089	4.0769	208.703	2.99934	NA
76.9891	1.70295	371.167	3.73547	NA
77.0096	2.35844	165.675	5.71473	NA
77.0316	1.46529	317.919	3.3844	NA
77.0971	1.66976	230.801	1.86819	NA
77.1193	2.65524	45.1447	2.31946	NA
77.135	5.66576	106.118	2.84589	NA
77.1452	1.9818	501.053	3.89055	NA
77.4166	1.38821	417.8	3.62976	NA
77.4484	2.21529	349.984	3.40348	NA
77.4713	2.3427	129.125	3.58005	NA
77.5053	1.9043	408.295	4.25547	NA
77.5226	2.15464	193.337	4.83344	NA
77.6552	1.60715	389.238	2.27291	NA
77.7494	1.83925	159.513	1.98935	NA
77.8341	1.98164	342.112	2.54964	NA
77.8591	2.07175	331.189	3.59674	NA
77.8698	3.08849	172.636	2.69323	NA
78.0423	2.01584	233.688	5.9128	NA
78.0576	1.75901	410.668	2.29986	NA
78.1041	1.76483	789.437	6.36985	NA
78.2318	2.1577	146.104	3.79037	NA
78.2775	1.43388	316.552	2.02233	NA
78.2909	1.95963	208.56	2.41786	NA
78.3002	3.06066	350.485	2.34009	NA
78.3345	2.19995	292.025	4.42255	NA
78.3586	1.88215	190.945	4.80519	NA
78.4322	1.95772	570.59	4.43685	NA
78.502	2.14743	237.82	3.09451	NA
78.5847	1.95594	626.64	3.33089	NA
78.6391	1.50239	217.751	2.38881	NA
78.6866	1.48808	368.547	2.06721	NA
78.7347	2.16638	540.808	3.22338	NA
78.8235	1.62645	595.824	3.02625	NA
78.838	1.95558	350.206	6.00968	NA
78.9922	1.82719	272.499	4.95299	NA
79.0149	2.56564	402.171	2.7127	NA
79.0398	2.22129	162.768	2.67624	NA
79.0843	2.02236	319.997	4.08326	NA
79.208	2.49737	113.698	2.54967	NA
79.474	6.17824	166.018	4.47389	NA
79.5029	1.78213	634.94	1.53003	NA
79.5323	2.07395	488.825	2.49564	NA
79.6062	3.32321	67.2403	2.35656	NA
79.6566	2.1016	315.987	8.71049	NA
79.7627	2.22703	553.011	5.52724	NA
79.7994	1.49125	622.898	2.36464	NA
79.8056	1.79545	260.448	2.90986	NA
79.8209	2.27143	141.63	1.83184	NA
79.8675	1.75222	364.762	2.07301	NA
80.0769	2.2444	80.868	4.50235	NA
80.1094	1.95967	102.815	1.32787	NA
80.1604	2.0832	192.056	4.8355	NA
80.3891	1.69716	137.978	2.65824	NA
80.4466	1.96293	105.435	2.83426	NA
80.5098	1.91108	249.24	2.29169	NA
80.5868	2.5588	87.4273	3.13838	NA
80.7174	1.52665	646.62	4.62955	NA
80.854	1.62991	259.62	1.76166	NA
81.0153	2.1032	146.299	6.04799	NA
81.0211	1.99192	786.904	2.79284	NA
81.1731	1.59992	605.228	2.57447	NA
81.2349	2.96575	354.889	8.9581	NA
81.4152	1.72535	360.843	2.4372	NA
81.4418	2.0361	59.0278	3.82369	NA
81.8953	3.4097	325.947	2.42147	NA
81.9922	3.0021	462.187	3.04904	NA
82.3189	2.42598	467.96	5.96	NA
82.3714	2.4576	43.3275	2.96609	NA
82.503	2.31432	240.415	3.22883	NA
82.5481	1.61235	449.249	3.56024	NA
82.6921	1.81217	446.329	4.33281	NA
82.7606	2.7693	521.932	2.24224	NA
82.7972	2.5302	583.48	4.55225	NA
82.8912	2.17192	228.225	2.76193	NA
82.9324	2.21005	441.108	3.74942	NA
82.9834	2.46978	523.387	3.71499	NA
83.0546	3.04523	484.257	2.28134	NA
83.1286	2.55777	172.187	2.00323	NA
83.456	3.97251	264.385	3.05792	NA
83.5675	2.2405	299.009	2.83979	NA
83.7119	2.29018	60.7606	4.36035	NA
83.9172	1.93039	119.428	2.63492	NA
83.9237	2.25797	85.1443	2.7503	NA
83.966	1.81135	151.252	2.27065	NA
84.0046	2.15428	213.145	3.3137	NA
84.1192	2.01332	252.249	8.80648	NA
84.1216	2.19126	1548.43	13.9414	NA
84.2186	1.44774	268.623	1.89081	NA
84.2541	2.67846	324.14	3.03616	NA
84.2864	4.58867	34.3184	3.17116	NA
84.4187	2.19584	206.974	1.51151	NA
84.4988	1.99138	113.277	1.65232	NA
84.5827	4.09572	90.5615	3.95804	NA
84.5841	2.73171	327.187	3.22095	NA
84.607	2.09224	102.012	1.47616	NA
84.6708	2.11849	552.59	4.77103	NA
84.7322	4.00041	250.303	3.60234	NA
84.7329	1.87807	251.86	1.39462	NA
84.9522	2.17994	73.017	2.42247	NA
85.0841	2.16289	101.058	1.90579	NA
85.1375	2.72718	144.54	1.65956	NA
85.1688	2.31573	112.853	2.27245	NA
85.1881	2.13643	174.293	2.72313	NA
85.1893	1.77788	437.408	2.98438	NA
85.2014	3.15827	56.6484	2.23269	NA
85.2312	2.001	65.2087	2.56867	NA
85.2828	1.83169	86.2232	2.13604	NA
85.5474	2.50023	78.651	2.15275	NA
85.5785	2.76276	95.5879	2.96937	NA
85.9771	2.19662	64.9105	2.66609	NA
86.0425	1.82816	58.1865	2.93328	NA
86.0631	2.4588	101.997	2.73526	NA
86.2551	3.05271	58.1995	2.34617	NA
86.3248	2.389	424.542	2.35299	NA
86.4486	1.92025	255.976	2.18374	NA
86.5143	2.35767	112.318	3.00403	NA
86.5177	2.0967	84.7846	1.84814	NA
86.5601	1.61671	409.981	2.64112	NA
86.6152	2.24455	52.9497	2.54192	NA
86.6438	1.75286	70.0205	2.32566	NA
86.9903	1.84894	53.3579	3.09496	NA
87.0564	2.19896	141.563	1.43134	NA
87.086	1.64185	66.1542	2.12459	NA
87.3521	2.07278	111.31	1.70502	NA
87.4032	2.38936	102.091	2.56381	NA
87.4358	2.41408	100.205	2.9132	NA
87.4365	2.33278	184.292	3.52161	NA
87.4695	2.37117	817.903	14.1128	NA
87.618	1.78085	150.741	3.01848	NA
87.7073	1.69176	64.5599	2.48754	NA
87.7355	1.85095	87.4398	2.87213	NA
87.7978	1.80779	78.0576	1.82351	NA
87.8926	2.24409	101.195	1.96924	NA
87.9259	3.31763	37.4636	2.84134	NA
88.1972	2.67833	47.4905	3.66771	NA
88.3309	2.46723	268.157	2.62757	NA
88.3472	2.25595	175.126	2.14562	NA
88.4964	2.62188	74.1867	2.50126	NA
88.5174	1.9517	118.929	1.64845	NA
88.7006	2.05199	85.5453	2.80747	NA
88.701	2.74803	83.6597	3.13284	NA
88.7625	2.10919	33.1365	2.35451	NA
88.8441	2.13663	61.9546	2.71426	NA
89.0093	2.72248	147.394	3.60415	NA
89.0484	3.12763	46.1451	3.086	NA
89.0527	2.54316	110.173	2.89162	NA
89.3185	2.11858	101.63	1.82278	NA
89.4241	3.90014	64.9916	2.82819	NA
89.4259	2.39995	65.4122	2.9721	NA
89.5555	2.35403	76.6523	2.72189	NA
89.6205	2.12908	327.385	4.13123	NA
90.2648	3.25962	33.7568	3.64524	NA
90.6804	2.29343	145.806	3.70805	NA
90.718	3.04623	66.2008	3.15133	NA
90.8377	1.81303	115.628	2.85326	NA
90.9886	1.87505	97.0501	2.08193	NA
91.1682	2.01502	98.2159	2.25786	NA
91.2435	4.34616	503.303	3.26641	NA
91.2523	3.7095	77.8781	1.99948	NA
91.2869	4.2982	590.086	5.20913	NA
91.3187	2.75505	63.1968	2.74226	NA
91.8285	2.92019	93.8298	2.28191	NA
91.859	2.64639	44.2016	2.44012	NA
91.9926	2.07742	309.418	1.96967	NA
92.2338	4.53486	40.3595	2.70618	NA
92.4656	1.68447	79.1457	3.14813	NA
92.5211	2.49038	154.27	2.05439	NA
92.5552	2.80791	50.4098	1.87133	NA
92.8731	1.9353	553.612	2.64005	NA
92.8782	3.50138	257.084	4.08658	NA
92.9013	3.08786	88.457	3.51791	NA
92.9676	2.39698	60.9615	3.06408	NA
93.0917	2.39945	98.989	2.29253	NA
93.5832	2.56266	68.2738	2.94038	NA
93.661	2.36313	263.994	9.96729	NA
93.6645	2.22202	347.521	1.82579	NA
93.6991	2.80675	99.3771	2.1028	NA
93.7381	5.79054	74.4549	3.66181	NA
93.7738	2.35174	50.3631	2.44526	NA
93.7827	2.36548	590.997	2.09591	NA
93.9334	2.53305	64.2171	2.47075	NA
93.9601	1.9515	40.459	2.28801	NA
94.0293	2.62988	109.248	3.04661	NA
94.0763	2.72903	56.309	3.1431	NA
94.199	2.71953	68.9979	2.31578	NA
94.2046	2.51406	53.1865	2.24508	NA
94.2473	2.14362	117.756	2.17437	NA
94.2482	4.59853	140.406	1.96944	NA
94.4222	1.71589	165.228	2.24441	NA
94.531	2.39073	134.507	1.38493	NA
94.5706	5.04086	245.868	2.8017	NA
94.5925	2.57909	58.4273	2.30304	NA
94.6708	1.71914	540.422	3.71676	NA
94.671	2.02198	45.4069	3.435	NA
94.8251	2.86078	26.9317	3.09756	NA
94.8335	2.18671	128.804	2.12198	NA
94.9452	2.1557	75.4399	2.76616	NA
94.9934	2.59685	183.66	2.73767	NA
95.2647	2.35379	181.248	2.54709	NA
95.3461	4.06538	362.601	2.70145	NA
95.4159	2.96353	114.208	2.69156	NA
95.5157	2.61574	67.3102	5.45727	NA
95.5225	2.46484	134.906	1.89986	NA
95.5704	2.32517	180.635	1.45461	NA
95.5859	2.45371	84.402	3.19261	NA
95.612	1.87568	113.777	1.93833	NA
95.6294	1.72224	43.3343	2.36847	NA
95.6296	2.67772	111.069	2.34027	NA
95.6904	2.37774	658.868	1.60352	NA
95.6974	2.3405	102.341	3.02444	NA
95.9422	2.2597	70.8051	2.68299	NA
95.9465	2.65391	74.9914	3.30811	NA
95.9722	2.15077	99.2721	4.01947	NA
96.0066	2.15099	36.566	4.0045	NA
96.0997	2.11633	78.8692	3.7166	NA
96.1051	2.29877	98.8732	2.23023	NA
96.1115	2.05287	98.8427	3.30589	NA
96.1673	1.88088	180.16	2.60953	NA
96.3015	2.35281	53.2807	1.80007	NA
96.3175	2.21443	133.187	2.99659	NA
96.3572	3.00912	38.5299	3.41844	NA
96.3859	2.35923	40.5346	3.14796	NA
96.4084	3.19113	66.6548	2.52918	NA
96.4119	2.5902	62.0556	3.85674	NA
96.4123	2.94339	93.9878	3.13221	NA
96.4257	1.96833	678.337	21.8503	NA
96.4264	1.85887	26.6216	3.35869	NA
96.4284	2.40185	76.7035	3.40052	NA
96.4549	1.84558	131.168	2.97692	NA
96.483	2.1029	31.931	3.51944	NA
96.5114	2.63634	87.1549	3.33645	NA
96.6472	4.41996	167.073	2.50348	NA
96.7914	2.36154	49.1429	4.05267	NA
96.8508	2.0926	406.854	1.90562	NA
96.8767	2.14958	55.2467	3.91521	NA
96.888	2.06809	88.3199	2.33937	NA
96.9277	2.8748	69.1121	1.92949	NA
96.988	2.82028	73.4732	3.73417	NA
97.3714	1.64963	148.527	2.15908	NA
97.4033	2.01328	61.1943	1.83794	NA
97.4117	3.62455	39.9833	3.25347	NA
97.4871	2.42157	126.134	2.76926	NA
97.6122	1.79846	73.2969	2.31779	NA
97.7014	2.86338	99.9799	2.35022	NA
97.713	2.15572	196.437	1.62433	NA
97.7641	2.70637	118.857	6.06334	NA
97.7688	2.62418	33.817	3.35126	NA
97.8428	6.76018	160.578	3.03076	NA
97.9482	2.65423	41.6112	3.36703	NA
97.9849	3.0076	75.6078	2.90318	NA
98.0156	6.95905	543.226	4.25429	NA
98.045	2.41706	193.342	2.37331	NA
98.0673	2.27562	465.332	3.47215	NA
98.1136	2.28845	52.3759	2.60879	NA
98.1253	3.14642	313.725	1.51801	NA
98.1352	2.92306	54.7342	3.77407	NA
98.2832	2.59507	71.4838	2.34629	NA
98.2937	2.50462	132.181	2.88566	NA
98.3166	1.76969	67.3281	3.83298	NA
98.3557	3.2781	138.684	2.00168	NA
98.3908	2.83944	125.213	4.03367	NA
98.5822	2.44767	153.322	2.29475	NA
98.592	2.66365	33.1287	3.18574	NA
98.6274	2.34781	64.654	3.18939	NA
98.9089	2.5466	99.5271	3.56154	NA
98.9797	3.38434	49.1176	3.68014	NA
99.1286	3.14072	58.3364	4.23414	NA
99.1741	2.53768	346.455	2.41122	NA
99.5321	2.34478	127.468	2.81236	NA
99.6984	2.43156	58.194	2.03985	NA
99.7795	2.46645	124.508	2.28247	NA
99.8227	2.12859	32.1286	3.57372	NA
99.8667	3.17333	89.1794	2.29157	NA
99.8823	2.57496	530.287	5.68548	NA
100.346	2.80992	54.4941	2.60699	NA
100.354	2.25561	146.593	3.2236	NA
100.387	2.69234	131.741	2.36985	NA
100.396	2.43529	575.424	2.49506	NA
100.573	2.51923	169.113	2.12025	NA
100.805	2.57457	75.7361	3.11844	NA
101.106	2.50774	124.328	2.94559	NA
101.349	2.7785	51.9807	3.49394	NA
101.4	2.47142	120.421	2.71657	NA
101.445	2.01716	355.77	3.38	NA
101.493	2.63007	240.844	2.36082	NA
101.607	3.80123	496.951	1.23767	NA
101.702	2.7917	217.289	2.98795	NA
101.765	3.7931	823.696	6.45058	NA
101.839	2.66385	669.842	1.75356	NA
102.087	2.33606	471.909	2.37596	NA
102.135	3.14935	141.519	2.24772	NA
102.324	2.34434	135.909	2.15661	NA
102.862	1.96367	302.614	3.3509	NA
102.939	3.06452	109.596	4.98189	NA
103.008	2.46504	291.562	3.149	NA
103.013	3.30307	103.423	2.45091	NA
103.154	2.23469	50.6983	2.18671	NA
103.276	2.27271	47.1548	3.50581	NA
103.68	2.92218	90.4039	5.89171	NA
104.067	2.27522	352.494	1.91153	NA
104.123	2.25664	82.3329	6.82145	NA
104.187	2.6975	286.689	2.71314	NA
104.357	2.77914	62.568	4.09288	NA
104.402	2.75156	411.114	3.62555	NA
104.44	5.03905	238.327	2.32539	NA
104.504	2.78652	80.9654	2.25101	NA
104.994	4.36496	305.131	5.84066	NA
105.127	2.64751	168.23	2.3109	NA
105.421	8.9082	258.264	2.9071	NA
105.422	3.24908	110.836	3.13869	NA
105.533	4.65465	284.815	3.3287	NA
105.535	3.25672	394.984	2.17124	NA
105.555	2.55738	222.681	2.12003	NA
105.647	2.53121	152.939	3.21765	NA
105.698	2.798	249.473	3.39826	NA
106.128	2.16044	984.258	11.6448	NA
106.16	2.53544	577.407	2.08828	NA
106.399	2.31898	412.838	2.64602	NA
106.403	3.10452	146.451	3.34203	NA
106.516	2.56515	42.3307	3.55449	NA
106.791	9.5086	32.6014	4.54361	NA
106.927	4.57872	20.3075	4.29231	NA
106.94	3.56275	157.577	3.55464	NA
107.001	2.59272	171.706	2.51907	NA
107.234	2.14112	474.025	1.3794	NA
107.257	2.09726	731.622	5.05196	NA
109.221	2.92124	216.612	2.35965	NA
109.447	3.3065	103.2	3.77727	NA
109.58	6.1974	33.5444	4.35706	NA
109.729	7.23117	414.27	5.10589	NA
110.521	2.2997	282.824	7.06019	NA
110.739	3.37273	829.348	1.91866	NA
112.192	2.30566	876.917	1.67897	NA
113.748	3.14867	66.7989	3.45292	NA
114.432	4.92328	810.732	3.33725	NA
115.017	3.06801	412.081	2.46273	NA
115.117	2.71705	188.892	1.9631	NA
115.152	7.03217	540.37	3.74954	NA
115.483	2.81635	972.479	10.5426	NA
115.532	5.56311	46.7654	2.73925	NA
117.202	7.57611	155.04	1.83368	NA
118.561	9.19513	495.519	4.09617	NA
118.896	3.10004	183.599	1.88711	NA
123.212	4.13719	68.1862	4.6042	NA
123.598	4.98144	151.378	2.678	NA
124.621	4.05904	254.259	2.07583	NA
125.747	5.09145	49.5851	2.62142	NA
125.966	5.99526	166.42	3.29165	NA
130.608	3.19443	141.654	3.56833	NA
130.868	3.1009	98.9549	1.55068	NA
131.353	3.6445	264.599	2.79935	NA
133.442	2.98469	147.117	4.60097	NA
134.535	3.1613	244.953	2.04716	NA
137.411	3.00237	110.629	3.35799	NA
137.523	3.67458	76.3174	2.32675	NA
138.301	12.1357	1879.61	3.38829	NA
139.601	3.55867	127.426	1.74886	NA
140.844	12.9028	46.4545	2.4502	NA
142.793	6.98131	35.2104	2.33688	NA
143.127	3.35404	101.517	4.86451	NA
143.203	2.92402	35.9405	3.44945	NA
143.366	3.58036	77.4413	3.1934	NA
145.733	9.83751	74.496	2.84687	NA
147.069	3.5282	24.4762	2.50126	NA
147.882	4.05506	108.633	2.92796	NA
148.199	3.6154	108.822	5.07825	NA
148.866	3.84486	153.199	2.08172	NA
149.088	2.89816	31.0977	4.62407	NA
149.138	5.75001	220.046	2.04593	NA
149.211	3.4487	136.794	3.5437	NA
149.606	5.02163	237.879	3.44624	NA
149.717	3.00972	115.07	2.72816	NA
151.181	3.07642	354.37	4.18599	NA
151.577	5.04051	68.0228	2.50625	NA
151.758	4.11921	50.3872	3.04657	NA
152.377	3.7346	18.429	5.17268	NA
152.762	3.15118	252.481	3.02554	NA
152.884	7.52481	220.852	1.81972	NA
153.16	3.23101	30.4896	5.43753	NA
153.769	5.74937	34.3954	3.81913	NA
154.224	3.16905	116	3.81212	NA
154.311	3.57457	142.574	6.46565	NA
154.666	4.28419	27.5276	3.96273	NA
155.702	3.59135	95.2872	4.28718	NA
155.89	2.97026	163.823	498.445	NA
156.582	4.93608	75.7866	5.86211	NA
157.176	4.27684	41.9192	2.99404	NA
158.345	4.01055	91.0509	3.07191	NA
158.706	3.94086	66.3592	2.3325	NA
158.727	4.08321	197.313	9.92938	NA
158.839	4.08532	55.2327	5.63732	NA
159.014	5.7878	95.6182	3.55545	NA
159.464	3.72826	62.1742	3.0973	NA
160.438	4.66318	86.7073	2.11667	NA
160.681	3.42902	54.0489	2.37448	NA
161.022	2.98126	63.5099	4.45301	NA
161.408	4.03521	89.9266	3.38298	NA
161.516	3.42736	216.758	1.24141	NA
161.583	4.48489	80.5224	6.19998	NA
161.586	5.06754	79.3074	2.21551	NA
161.745	8.63249	255.767	2.73572	NA
162.044	4.15942	83.9936	2.30133	NA
162.388	4.60911	41.0873	3.93109	NA
162.51	3.87949	86.8931	3.94094	NA
162.526	3.95637	121.471	4.19656	NA
162.586	3.51484	66.9391	2.40959	NA
163.699	4.12749	113.104	2.5488	NA
164.04	5.68728	44.058	2.8055	NA
164.231	4.35585	49.5769	5.44495	NA
164.249	4.68072	80.9088	2.56502	NA
164.627	4.94304	103.118	3.58242	NA
165.588	5.19531	41.4079	3.62909	NA
165.628	5.42287	130.814	3.02025	NA
165.712	4.46695	55.3586	2.53767	NA
165.984	3.38491	43.836	3.33893	NA
166.688	5.59711	65.214	4.24477	NA
166.973	4.4218	165.844	2.86251	NA
166.974	2.92771	289.189	4.06928	NA
167.153	3.8238	497.549	4.65667	NA
167.742	3.57886	87.9656	4.08979	NA
167.757	3.46174	120.792	2.93705	NA
169.555	3.78932	82.3744	4.0726	NA
169.632	4.8631	41.0253	4.01715	NA
169.865	4.71835	84.736	3.92867	NA
170.001	4.43969	93.7123	2.05201	NA
170.328	4.87606	116.916	3.59194	NA
170.704	4.19653	42.5921	3.17897	NA
171.125	5.77604	65.6878	3.32223	NA
171.482	4.66684	113.474	3.50262	NA
171.549	3.89336	165.541	2.40358	NA
171.749	5.65172	64.6061	1.84826	NA
171.847	4.15922	51.6743	2.30198	NA
172.577	3.59961	114.408	2.91428	NA
173.036	3.03119	253.441	2.09692	NA
174.686	3.22287	160.805	5.26068	NA
175.353	4.95792	149.685	3.30744	NA
175.494	5.54111	60.1564	4.48759	NA
176.05	4.60726	91.383	2.46164	NA
176.345	4.51269	108.511	4.16488	NA
176.812	4.93142	411.96	1.5033	NA
178.032	3.87768	187.818	7.68731	NA
178.241	3.63305	241.243	3.24816	NA
179.577	4.66813	55.3252	3.97424	NA
179.736	5.28199	68.7218	2.40012	NA
180.615	4.72883	131.717	2.55185	NA
182.284	5.25675	65.5707	3.12346	NA
182.736	3.71105	269.553	1.77901	NA
182.795	5.69553	100.196	3.32293	NA
183.289	4.72037	153.796	4.68577	NA
183.414	4.23717	138.586	3.2244	NA
184.094	4.57174	275.356	2.04469	NA
184.898	3.47569	312.403	2.86365	NA
185.506	3.99381	66.004	5.57004	NA
185.987	5.48894	55.6931	2.56301	NA
186.544	12.5619	83.8813	3.03566	NA
186.896	4.08725	519.102	19.5579	NA
187	12.0508	127.074	1.72577	NA
187.54	4.95363	109.916	2.31072	NA
187.721	3.99469	153.153	3.62749	NA
188.115	5.43939	91.5358	2.3564	NA
188.364	17.6186	136.278	2.37027	NA
188.757	4.02962	213.469	2.17093	NA
188.837	5.6222	148.996	1.92025	NA
189.31	4.23155	49.4279	1.95428	NA
189.394	5.83039	73.6925	2.84628	NA
189.542	2.92896	523.905	2.94926	NA
189.854	5.30654	15.8095	5.47572	NA
190.76	3.46152	84.9499	1.92103	NA
190.777	6.07995	128.685	3.60502	NA
191.587	5.80921	354.807	4.43696	NA
191.648	4.89286	139.44	2.87165	NA
192.689	4.66621	781.112	4.84516	NA
192.913	4.78563	142.337	4.40641	NA
193.676	3.93082	148.491	3.22441	NA
193.745	5.14318	136.256	3.56778	NA
193.99	4.10606	67.8198	3.94722	NA
194.231	8.08452	71.1262	2.60342	NA
194.556	3.84339	141.604	5.1771	NA
194.623	4.07392	150.976	4.64865	NA
194.906	4.42814	278.089	1.61215	NA
194.923	3.87007	130.687	3.29249	NA
198.373	4.08485	75.4502	5.29336	NA
199.256	4.5093	96.2067	3.22971	NA
199.641	5.65761	164.04	2.44347	NA
199.645	5.93926	125.874	2.7087	NA
199.805	7.76358	59.074	3.66346	NA
200.183	8.88263	516.009	1.33292	NA
200.556	4.62981	125.116	2.23762	NA
201.008	6.16042	56.5558	3.90245	NA
202.365	6.13649	51.6453	2.90949	NA
202.673	5.2554	206.01	4.07181	NA
202.815	4.17211	138.214	2.58115	NA
202.896	5.41619	135.865	3.77628	NA
203.242	4.95122	48.7432	3.78826	NA
205.649	13.5731	407.992	2.12406	NA
207.719	9.16906	266.209	2.68778	NA
211.487	5.27929	136.978	5.25951	NA
212.328	5.77976	31.0144	3.63913	NA
212.487	5.28784	260.171	3.94297	NA
215.961	6.56089	302.345	2.21467	NA
216.678	20.8538	167.842	3.77559	NA
216.982	7.22737	328.472	2.29353	NA
222.445	4.88133	73.0968	2.63432	NA
223.526	6.6784	114.901	2.80456	NA
225.405	8.37496	49.9588	3.63448	NA
225.486	12.1153	255.018	2.58171	NA
226.088	5.86768	107.651	3.9586	NA
233.603	9.50925	137.665	4.10391	NA
236.374	18.062	141.986	2.25338	NA
236.524	14.6225	69.8432	4.23527	NA
244.543	13.854	140.92	3.41395	NA
252.623	11.8861	106.862	4.32749	NA
253.729	5.59857	149.255	4.82957	NA
255.499	7.6296	277.517	5.69859	NA
259.572	22.7248	106.252	2.51748	NA
262.538	20.4358	81.3141	3.08203	NA
271.663	4.70771	84.1219	4.71499	NA
277.743	8.63575	228.666	2.29383	NA
298.668	9.15632	497.843	2.95073	NA
304.771	7.43438	65.8708	1.84769	NA
322.296	7.80561	146.923	4.91977	NA
324.58	10.4124	468.41	5.88645	NA
337.064	6.10518	102.331	7.92282	NA
341.996	8.207	383.451	2.30538	NA
342.773	7.916	219.878	2.62339	NA
344.174	8.53388	200.553	5.15931	NA
345.801	5.38131	98.7699	6.69865	NA
347.556	6.51509	350.186	2.48404	NA
350.081	6.00805	314.978	1.58704	NA
354.052	10.2987	78.2506	2.17855	NA
354.097	8.62884	414.858	4.61838	NA
358.016	6.95128	977.701	3.27817	NA
358.442	6.86714	309.344	2.03094	NA
358.903	8.56218	165.004	2.95936	NA
358.961	9.23899	272.927	3.56072	NA
360.66	7.85737	220.689	6.7835	NA
361.212	7.3507	186.496	3.35607	NA
362.234	7.56414	306.741	2.58421	NA
366.536	6.13809	307.716	2.09248	NA
384.839	21.1646	197.127	9.92606	NA
464.183	8.41482	122.823	2.39598	96.315
620.031	14.0751	83.7616	1.1502	95.6927
1037.68	17.866	113.38	1.71999	95.5509
1065.3	16.5779	285.696	2.89217	96.2641
1252.05	23.5774	146.854	1.7509	84.0634
1459.84	25.5606	315.098	3.64249	82.7085
1503.51	26.4	91.7153	2.90308	92.734
1712.19	13.7934	155.542	1.81312	89.846
1752.45	11.9386	84.0903	1.86632	98.9749
1758.37	16.188	118.462	1.16439	101.143
1765.4	13.7419	79.8694	1.12967	98.741
1791.99	17.7208	87.0224	1.80149	101.141
1832.2	17.1187	64.5259	0.736146	100.918
1875.1	18.5921	57.1152	6.10092	94.0019
1935.1	17.1322	51.8206	1.02407	96.3251
1974.83	25.0353	44.9393	1.03125	94.2558
1988.22	10.7094	153.553	1.12141	100.067
2018.36	37.2654	100.098	2.24146	90.686
2045.03	13.5509	93.0047	2.0942	92.4004
2073.91	16.0364	17.8863	2.94762	100.191
2328.85	13.2369	235.718	2.06665	93.2086
2387.26	12.0833	127.337	1.00962	82.6908
2599.47	14.4065	53.6063	3.71399	97.4711
2669.22	12.7136	115.117	0.805416	99.4526
2732.45	13.444	52.1428	1.25988	88.9748
2912.37	19.153	36.2943	1.141	93.8695

## Sheet: Yukon-Tanana Uplands
OBJECTID *	Shape *	REC_NO	SAMPLE	QUAD	LATITUDE	LONGITUDE	ROCK_TYPE	MINERAL	METHOD	COMMENT	REFERENCE	PREFERRED_AGE	ERROR
37	Point	75	14-10	Big Delta	64.5717	-146.5	OTHER	OT	U/Pb	Equus radius, actual date 0.027my, 231Pa, Canyon Creek site	Hamilton and Bischoff, 1984	0.03	0.0006
39	Point	76	14-10	Big Delta	64.5717	-146.5	OTHER	OT	U/Pb	Equus radius, actual date 0.036my, 230Th, Canyon Creek site	Hamilton and Bischoff, 1984	0.04	0.0008
40	Point	73	14-1	Big Delta	64.5717	-146.5	OTHER	OT	U/Pb	Mammuthus cranial fragment, actual date 0.056my, 231 Pa, Canyon Creek site	Hamilton and Bischoff, 1984	0.06	0.0012
41	Point	79	14-6a	Big Delta	64.5717	-146.5	OTHER	OT	U/Pb	Equus metacarpal, actual date 0.056my, 231Pa, Canyon Creek site	Hamilton and Bischoff, 1984	0.06	0.0012
42	Point	74	14-1	Big Delta	64.5717	-146.5	OTHER	OT	U/Pb	Mammuthus cranial fragment, actual date 0.074my, 230Th, Canyon Creek	Hamilton and Bischoff, 1984	0.07	0.0014
43	Point	77	14-4	Big Delta	64.5717	-146.5	OTHER	OT	U/Pb	Equus humerus, actual date 0.073my, 231Pa, Canyon Creek site	Hamilton and Bischoff, 1984	0.07	0.0014
44	Point	78	14-4	Big Delta	64.5717	-146.5	OTHER	OT	U/Pb	Equus humerus, 230Th, Canyon Creek site	Hamilton and Bischoff, 1984	0.08	0.0016
45	Point	80	14-6a	Big Delta	64.5717	-146.5	OTHER	OT	U/Pb	Equus metacarpal, actual date 0.081my, 230Th, Canyon Creek site	Hamilton and Bischoff, 1984	0.08	0.0016
46	Point	81	14-6b	Big Delta	64.5717	-146.5	OTHER	OT	U/Pb	Equus metacarpal, actual date, 0.083my, 230Th, Canyon Creek site	Hamilton and Bischoff, 1984	0.08	0.0016
109	Point	1378	POGO-00-24	Big Delta	64.4163	-144.766	Rhyolite	Zircon	TIMS-multigrain	Rhyolite dike	Dilworth and others, 2007	51.8	0.3
153	Point	1377	MAPT-5	Big Delta	64.4295	-144.873	Rhyolite	Zircon	TIMS-multigrain	Rhyolite dike	Dilworth and others, 2007	54.5	0.5
169	Point	66	04AD 239	Big Delta	64.4955	-144.047	Rhyolite	Zircon	U/Pb	Zircon core, crystal-rich rhyolite	Day and others, 2007	57.2	0.6
238	Point	1247	140A5	Eagle	64.0219	-143.093	Rhyolite	Zircon	SHRIMP	Rhyolite porphyry dike. Core, weighted average, less than or equal to about 65 Ma	Day and others, 2014; Dusel-Bacon and others, written communication, 2014	65	1.3
241	Point	1243	08ADb03	Eagle	64.2175	-142.909	Granite	Zircon	SHRIMP	Nonfoliated medium-grained biotite granite. Core, weighted average	Day and others, 2014; Dusel-Bacon and others, written communication, 2014	65.8	1.4
242	Point	1244	08ADb19	Eagle	64.2361	-143.083	Granite	Zircon	SHRIMP	Nonfoliated medium-grained hornblende-biotite granite. Core, weighted average	Day and others, 2014; Dusel-Bacon and others, written communication, 2014	65.8	1.5
245	Point	1277	08ADb13	Tanacross	63.6547	-142.29	Quartz monzonite	Zircon	SHRIMP	Equigranular hornblende-biotite quartz monzonite of Mount Fairplay	Dusel-Bacon and others, written communication, 2014	66.5	1.1
255	Point	1276	08ADb14	Tanacross	63.6819	-142.258	Syenite	Zircon	SHRIMP	Potassium feldspar megacrystic clinopyroxene-hornblende-biotite syenite of Mount Fairplay	Dusel-Bacon and others, written communication, 2014	67	1.5
257	Point	1245	129A5	Eagle	64.1146	-143.013	Granite	Zircon	SHRIMP	Nonfoliated fine-grained biotite granite. Core, weighted average	Day and others, 2014; Dusel-Bacon and others, written communication, 2014	67.7	0.7
260	Point	1246	81A5	Eagle	64.2133	-143.005	Granite	Zircon	SHRIMP	Nonfoliated biotite-hornblende granite with “smoky” quartz phenocrysts. Core, weighted average	Day and others, 2014; Dusel-Bacon and others, written communication, 2014	67.9	1.1
268	Point	1248	118A5	Eagle	64.0918	-143.038	Rhyolite	Zircon	SHRIMP	Rhyolite porphyry dike. Core, weighted average	Day and others, 2014; Dusel-Bacon and others, written communication, 2014	68.1	0.8
290	Point	1241	10ADb17	Eagle	64.3114	-143.142	Porphyry	Zircon	SHRIMP	Granite porphyry within western part of Middle Fork caldera fill	Bacon and others, written communication; Dusel-Bacon and others, written communication, 2014	69.7	1.2
305	Point	1240	10ADb22	Eagle	64.2961	-143.112	Rhyolite tuff	Zircon	SHRIMP	Intracaldera rhyolite tuff, Middle Fork caldera	Bacon and others, written communication; Dusel-Bacon and others, written communication, 2014	70	1.2
306	Point	1263	09AD-264	Eagle	64.2058	-142.809	Gneiss	Zircon	SHRIMP	Mylonitic tonalite gneiss interlayered within mafic metavolcanic sequence (unit Pzmv). Rim, weighted average, age about 70 Ma.	Day and others, 2014	70	1.4
310	Point	1016	Fish06-04-35	Eagle	64.2608	-142.705	Porphyry	Zircon	SHRIMP		Dusel-Bacon and others, 2009	70.5	1.1
315	Point	1242	71Afr965	Eagle	64.2053	-142.614	Rhyolite tuff	Zircon	SHRIMP	Outflow tuff from Gold Creek	Bacon and others, written communication	71.1	0.5
316	Point	1384	0M-143	Tanacross	63.6328	-141.474	Felsic porphyry	Zircon	ICPMS	Phylically altered quartz porphyry containing quartz vein stockwork and disseminated molybdenite and pyrite; Bluff prospect	Allen and others, 2013	71.4	0.3
318	Point	1383	0M-142	Tanacross	63.6422	-141.457	Granodiorite	Zircon	ICPMS	Phylically altered hornblende granodiorite; Bluff prospect	Allen and others, 2013	71.6	0.6
420	Point	1376	KGG-14	Big Delta	64.4805	-144.542	Tonalite	Zircon	TIMS-multigrain	Hornblende-biotite tonalite, Goodpaster batholith	Dilworth and others, 2007	93.7	0.2
421	Point	1249	08AD-32A	Eagle	64.053	-143.125	Porphyritic rock	Zircon	SHRIMP	Quartz feldspar porphyry intrusion. Core, weighted average	Day and others, 2014; Dusel-Bacon and others, written communication, 2014	93.9	1.3
427	Point	1375	DDH-105-745	Big Delta	64.4543	-144.91	Diorite	Zircon	TIMS-multigrain	Pyroxene-biotite-hornblende diorite. Diamond drill hole 105-745, Liese zone, depth 745 to 750 ft	Dilworth and others, 2007	94.5	0.2
429	Point	69	05MO 126	Big Delta	64.2699	-144.12	Porphrytic dike	Zircon	U/Pb	Megacrsytic quartz-feldspar porphyry dike, zircon core	Day and others, 2007	95.4	0.9
430	Point	1280	09MBW247A	Tanacross	63.2381	-142.352	Granite	Zircon	ICPMS	Coarse-grained, gray, equigranular biotite granite, ~8 percent biotite, 30 percent quartz. Age is weighted mean average of 48 out of 49 grains	Solie and others, 2014	95.74	0.39
431	Point	1250	09AD-343	Eagle	64.0331	-143.227	Porphrytic dike	Zircon	SHRIMP	Quartz feldspar porphyry dike. Core, weighted average	Day and others, 2014; Dusel-Bacon and others, written communication, 2014	95.8	1.5
436	Point	1270	LC7-678	Eagle	64.5192	-141.428	Felsic porphyry	Zircon	TIMS-multigrain	considerable scatter in data, suggesting inheritance as well as lead loss. Sample is porphyritic felsic igneous rock from drill core, location is of collar of drill hole, sample from 660 foot depth.	Dusel-Bacon and others, 2003	96.2	1
437	Point	1275	10ADb25	Eagle	64.2089	-143.799	Dike	Zircon	SHRIMP	Granodioritic porphyry dike; intrudes Mount Harper batholith	Dusel-Bacon and others, written communication, 2014	96.2	1.3
439	Point	1281	09LF454A	Tanacross	63.9663	-141.636	Monzogranite	Zircon	ICPMS	Porphyritic monzogranite, 15 percent 2cm kspar, 15 percent 8mm quartz, 1 percent mm hornblende, 15 percent 2mm biotite, 25 percent 4mm plagioclase, 15 percent 2mm kspar, 15 percent 1mm quartz. Kspar phenocrysts up to 3cm. Age is weighted mean average of 48 out of 50 grains	Solie and others, 2014	96.58	0.37
440	Point	1282	09TDH75A	Tanacross	63.0561	-141.603	Granodiorite	Zircon	ICPMS	Porphyritic hornblende granodiorite, 10 percent hornblende up to 1cm, euhedral; 20 percent quartz 2-3mm; 35 percent plagioclase 2mm; 25 percent biotite 1.5mm; kspar 1mm. Age is weighted mean average of 48 out of 49 grains	Solie and others, 2014	97.31	0.39
441	Point	1284	09LF279A	Tanacross	63.2045	-141.19	Granite	Zircon	ICPMS	Coarse-grained biotite granite, 15 percent 8mm quartz phenocrysts, 5 percent 1cm kspar phenocrysts, 15 percent 2mm biotite, 25 percent 3mm plagioclase, 20 percent 2mm kspar, 20 percent interstitial ~0.5mm quartz+feldspar. Age is weighted mean average of 45 out of 47 grains	Solie and others, 2014	97.32	0.4
442	Point	1285	09Z213A	Nabesna	62.5945	-141.084	Quartz monzonite	Zircon	ICPMS	Biotite hornblende quartz monzonite, light gray, 30 percent mafics (black). Some porphyritic hornblende up to 1cm long; feldspar megacrysts to 3cm long. Age is weighted mean average of 38 out of 39 grains	Solie and others, 2014	97.47	0.4
443	Point	1286	09LF441A	Nabesna	62.9709	-141.603	Syenogranite	Zircon	ICPMS	Porphyritic syenogranite, 12 percent 8mm quartz, 10 percent 1.5cm kspar, 18 percent biotite, 1 percent 1cm hornblende completely replaced by biotite, remainder 1mm feldspar >>quartz. Age is weighted mean average of 44 out of 45 grains	Solie and others, 2014	97.75	0.38
452	Point	67	05AD 353	Big Delta	64.2659	-144.187	Porphyry	Zircon	U/Pb	Megacrystic quartz-feldspar porphyry, zircon core	Day and others, 2007	99.5	0.9
453	Point	1287	09TDH74A	Tanacross	63.0584	-141.61	Granodiorite	Zircon	ICPMS	Porphyritic hornblende granodiorite, 10 percent hornblende 0.1cm up to 2cm, euhedral; 20 percent quartz 3mm; 15 percent biotite 3mm. Age is weighted mean average of 46 out of 50 grains	Solie and others, 2014	99.67	0.48
462	Point	1288	09MBW103A	Tanacross	63.1253	-141.834	Granodiorite	Zircon	ICPMS	Tan, medium-grained, ~equigranular granodiorite, ~1 percent dull black hornblende(?), 8 percent shiney black 3mm biotite, 30-35 percent clear glassy pinkish granular aggregates of quartz, white-tan feldspars ?1cm. Age is weighted mean average of 43 out of 48 grains	Solie and others, 2014	100.29	0.5
463	Point	1289	09LF419A	Tanacross	63.0505	-141.718	Granodiorite	Zircon	ICPMS	Biotite hornblende granodiorite, 5 percent 1cm hornblende phenocrysts, 20 percent 3mm biotite, 15 percent 2mm quartz, 60 percent ~3mm feldspars. Age is weighted mean average of 47 out of 50 grains	Solie and others, 2014	100.96	0.57
468	Point	1274	10ADb26A	Eagle	64.2089	-143.798	Dike	Zircon	SHRIMP	Aplite dike cut by quartz veinlets; intrudes Mount Harper batholith	Dusel-Bacon and others, written communication, 2014	101.4	1.4
470	Point	1290	09Z172B	Nabesna	62.7624	-141.017	Monzogranite	Zircon	ICPMS	Biotite monzogranite, ~15 percent black biotite in light gray to light brownish mix of felsic minerals. Associated with 70 percent hornblende biotite granodiorite at station location. Age is weighted mean average of 7 out of 47 grains	Solie and others, 2014	102.46	1.33
471	Point	1291	09LF254A	Tanacross	63.2879	-142.265	Granite	Zircon	ICPMS	Hornblende biotite granite, 20 percent 1cm quartz, 5 percent 8mm kspar, 1 percent 1cm hornblende, 18 percent 2mm biotite, remainder 2mm quartz+feldspar. Quartz phenos distinctive on weathered surface. Age is weighted mean average of 43 out of 49 grains	Solie and others, 2014	102.88	0.43
473	Point	1292	09LF433A	Tanacross	63.0357	-141.671	Granodiorite	Zircon	ICPMS	Biotite hornblende granodiorite, 8 percent 1cm hornblended phenocrysts, 15 percent 3mm biotite, 15 percent 3mm quartz, 30 percent 3mm kspar, 32 percent 2mm plagioclase. Age is weighted mean average of 47 out of 47 grains	Solie and others, 2014	103.06	0.56
474	Point	1273	10ADb23	Eagle	64.2383	-143.81	Granite	Zircon	SHRIMP	Biotite granite, Mount Harper batholith	Dusel-Bacon and others, written communication, 2014	103.2	1.5
475	Point	1374	MAPT-7	Big Delta	64.4433	-144.852	Granodiorite	Zircon	SHRIMP	Biotite granodiorite, west of 4021 prospect	Dilworth and others, 2007	103.4	2.2
476	Point	1293	09LF647A	Tanacross	63.294	-142.384	Gabbro	Zircon	ICPMS	Hornblende gabbro, 20 percent 1cm black hornblende, 40 percent 3mm green amphibole, 40 percent interstitial feldspar. Some hornblende up to 2cm. Age is weighted mean average of 48 out of 48 grains	Solie and others, 2014	103.82	0.41
477	Point	1294	09LF637A	Tanacross	63.2911	-142.345	Syenogranite	Zircon	ICPMS	Fine-grained biotite syenogranite, 4 percent 3mm biotite flakes, 12 percent 0.5mm biotite, 25 percent 0.5mm quartz, ~30 percent pinkish 1mm feldspar. Age is weighted mean average of 23 out of 38 grains	Solie and others, 2014	103.82	0.41
485	Point	1028	93ADb37	Eagle	64.088	-141.651	Granodiorite	Titanite	TIMS-multigrain		Dusel-Bacon and others, 2009	105.2	2
486	Point	1373	MAPT-14	Big Delta	64.4383	-144.612	Tonalite	Monazite	TIMS-multigrain	Hornblende-biotite tonalite, Goodpaster batholith	Dilworth and others, 2007	105.7	0.3
487	Point	1295	09LF644A	Tanacross	63.2944	-142.374	Monzogranite	Zircon	ICPMS	Seriate coarse-grained biotite monzogranite, 15 percent 8mm quartz (up to 2cm composite grains), 18 percent 3mm biotite, 40 percent 3mm bluish-white plagioclase, 23 percent 2mm kspar. Age is weighted mean average of 45 out of 47 grains	Solie and others, 2014	105.89	0.39
488	Point	59	01AD257	Big Delta	64.417	-144.536	Granodiorite dike	Zircon	SHRIMP	Zircon rim, core age 315-445 Ma	Day and others, 2003	106	3
489	Point	1296	09MBW338A	Tanacross	63.3251	-142.427	Quartz monzonite	Zircon	ICPMS	Tan, fine- to medium-grained, equigranular porphyritic quartz monzonite, ~6 percent hornblend, ~1-2 percent chloritized biotite(?), ~25 percent quartz. Age is weighted mean average of 49 out of 50 grains	Solie and others, 2014	106.17	0.59
490	Point	1372	SP-00-14	Big Delta	64.4233	-144.599	Granodiorite	Monazite	TIMS-multigrain	Biotite granodiorite, Shawnee Peak	Dilworth and others, 2007	106.9	1.3
495	Point	1365	OGNU-98-93	Big Delta	64.4543	-144.91	Orthogneiss	Monazite	TIMS-multigrain	Orthogneiss. Diamond drill hole 98-93, Liese zone, depth 852 to 853.5 ft	Dilworth and others, 2007	107	0.6
496	Point	1368	97-75	Big Delta	64.4543	-144.91	Granodiorite	Monazite	TIMS-multigrain	Biotite-poor granodiorite. Diamond drill hole 97-75, Liese zone, depth 1257 to 1259 ft	Dilworth and others, 2007	107.1	0.6
497	Point	1366	98-176	Big Delta	64.4543	-144.91	Granite gneiss	Monazite	TIMS-multigrain	Granite gneiss. Diamond drill hole 98-176, Liese zone, depth 585.6 to 587.8 ft	Dilworth and others, 2007	107.3	0.8
498	Point	1367	GDIB-97-71	Big Delta	64.4543	-144.91	Granodiorite	Monazite	TIMS-multigrain	Biotite-rich granodiorite. Diamond drill hole 97-71, Liese zone, depth 265.5 to 266.7 ft	Dilworth and others, 2007	107.3	0.8
499	Point	1370	PEGM-98-93	Big Delta	64.4543	-144.91	Pegmatite	Monazite	TIMS-multigrain	Pegmatite. Liese zone, diamond drill hole 98-93?	Dilworth and others, 2007	107.5	2
501	Point	63	03AD 107	Big Delta	64.3327	-144.218	Granite	Zircon	U/Pb	Nonfoliated biotite granite with Black Mountain tectonic zone, zircon core	Day and others, 2007	107.6	1.2
503	Point	68	05AD 392	Big Delta	64.4698	-144.022	Diorite	Zircon	U/Pb	Nonfoliated diorite dike within Black Mountain tectonic zone, zircon core	Day and others, 2007	107.9	1.1
504	Point	1371	POGO-00-16	Big Delta	64.4655	-144.913	Leucogranite	Monazite	TIMS-multigrain	Leucogranite. Liese zone	Dilworth and others, 2007	107.9	1.2
512	Point	1369	MAPT-21	Big Delta	64.4543	-144.91	Pegmatite	Monazite	TIMS-multigrain	Pegmatite. Liese zone, underground	Dilworth and others, 2007	108	1
514	Point	1251	08AD-052	Eagle	64.0286	-143.246	Granite	Zircon	SHRIMP	Nonfoliated biotite granite. Core, weighted average	Day and others, 2014; Dusel-Bacon and others, written communication, 2014	108.8	1.7
516	Point	58	02AD339	Big Delta	64.4352	-144.653	Granitc orthogneiss	Zircon	SHRIMP	Two populaions of zircon rim, core age 367-1184 Ma	Day and others, 2003	109	2
517	Point	62	03AD 106	Big Delta	64.3748	-144.192	Diorite	Zircon	U/Pb	Porphyritic diorite of Black Mountain, zircon core	Day and others, 2007	109	1.1
519	Point	1364	OGNU-98-93	Big Delta	64.4543	-144.91	Orthogneiss	Zircon	TIMS-multigrain	Hornblende-biotite orthogneiss. Diamond drill hole 98-93, Liese zone, depth 852 to 853.5 ft	Dilworth and others, 2007	109.2	0.4
520	Point	71	06AD 431	Big Delta	64.4875	-144.317	Granodiorite	Zircon	U/Pb	Nonfoliated hornblende biotite granodiorite of Goodpaster batholith, zircon core	Day and others, 2007	109.9	1.4
522	Point	64	03AD 56	Big Delta	64.3431	-144.245	Granodiorite	Zircon	U/Pb	Foliated biotite granodiorite of Mount Harper batholith, zircon core	Day and others, 2007	110.1	1
523	Point	70	06AD 415	Big Delta	64.3187	-144.02	Granodiorite	Zircon	U/Pb	Nonfoliated biotite granodiorite of Mount Harper batholith, zircon core	Day and others, 2007	110.5	1.1
531	Point	1252	08ADb20	Eagle	64.0089	-143.31	Granite	Zircon	SHRIMP	Nonfoliated leucogranite. Core, weighted average	Day and others, 2014; Dusel-Bacon and others, written communication, 2014	111.8	1.5
532	Point	54	01AD213	Big Delta	64.4212	-144.57	Biotite-sillimanite Gneiss	Monazite	SHRIMP	U/Pb SHRIMP age matches with zircon core ages, but note that there are multiple older zircon cores.	Day and others, 2003	112	2
534	Point	72	06MO 195	Big Delta	64.2664	-144.35	Granodiorite	Zircon	U/Pb	Biotite granodiorite of Brink intrusion, zircon core	Day and others, 2007	112.9	1.3
535	Point	60	01AD257	Big Delta	64.417	-144.536	Granodiorite dike	Monazite	SHRIMP	Zircon, core age 315-445 Ma	Day and others, 2003	113	5
536	Point	1070	96ADb10A	Big Delta	64.925	-144.825	Orthogneiss	Zircon	SHRIMP	Average age from rims of 33 grains of which 7 are included in average. Most grains have Devonian cores. Some also have Proterozoic and Archean cores. Authors considered cores to all indicate inheritance. However, an alternative interpretation is that it is a metamorphosed Devonian pluton, such as is common in the Yukon-Tanana Upland.	Dusel-Bacon and others, 2003	113	2
537	Point	1072	98ADb66B	Big Delta	64.6311	-145.673	Granite	Zircon	SHRIMP	Dike intruding sillimanite gneiss.. Really dubious data and calculated date; authors could not determine with any certainty, calculated with selective data either 120 or 133 Ma and picked 113 because they liked it better. Could even have been 100 Ma!	Dusel-Bacon and others, 2003	113	2
538	Point	57	02AD339	Big Delta	64.4352	-144.653	Granitc orthogneiss	Zircon	SHRIMP	Two populaions of zircon rim, core age 367-1184 Ma	Day and others, 2003	114	2
541	Point	1069	83Ad170	Big Delta	64.9252	-144.826	Orthogneiss	Monazite	TIMS-multigrain	Orthogneiss body pCwo (map loc. V; tables 1,2) yielded a K-Ar age determination of 89.8 ±2.7 Ma for biotite; this age is interpreted as a thermal overprint from numerous unmetamorphosed Cretaceous and Tertiary age plutons in the area. A U-Pb model age of 671 ±34 Ma was obtained on zircon from orthogneiss of this unit (J.N. Aleinikoff, U.S. Geological Survey, written commun., 1984, map loc. V; fig…	Dusel-Bacon and others, 2003	115	2.3
543	Point	90	79AFr2010	Big Delta	64.6305	-145.672	Granite	Zircon	TIMS-multigrain	(+150)	Aleinikoff and others, 1984b; Dusel-Bacon and Aleinikoff, 1985	116	3
544	Point	91	79AFr2010	Big Delta	64.6305	-145.672	Granite	Zircon	TIMS-multigrain	(-200+250)	Aleinikoff and others, 1984b; Dusel-Bacon and Aleinikoff, 1985	116	3
545	Point	93	79AFr2010	Big Delta	64.6305	-145.672	Granite	Zircon	TIMS-multigrain	Zircon (-325)	Aleinikoff and others, 1984b	116	3
546	Point	55	01AD269	Big Delta	64.364	-144.893	Biotite Gneiss	Zircon	SHRIMP	Zircon rim, core age range of 1,020 to 2,585 Ma	Day and others, 2003	116	4
547	Point	53	01AD213	Big Delta	64.4212	-144.57	Biotite-sillimanite Gneiss	Zircon	SHRIMP	Zircon rim, core age range of 970 to 1150 Ma	Day and others, 2003	116	2
551	Point	61	03AD 105	Big Delta	64.3725	-144.466	Augen Gneiss	Zircon	SHRIMP	Mylonitic augen gneiss, zircon rim	Day and others, 2007	117.3	3
553	Point	719	02RN533A	Big Delta	64.4562	-145.101	Granodiorite	Zircon	TIMS-multigrain	This is fraction A. There are also fractions B, C, D, E, F	Werdon and others, 2004a	119.8	0.5
556	Point	109	79AFr4017C	Big Delta	64.145	-144.442	Metavolcanic rock	Zircon	U/Pb	(-400)	Aleinikoff and others, 1986	134	2.68
557	Point	128	78AFr AG5	Big Delta	64.31	-144.442	Augen Gneiss	Sphene	TIMS-multigrain		Aleinikoff and others, 1981a	134	2.68
597	Point	1022	98ADb30	Eagle	64.3353	-141.843	Monzodiorite	Titanite	TIMS-multigrain		Dusel-Bacon and others, 2009	172.5	0.6
608	Point	1256	08ADb08	Eagle	64.2144	-142.884	Quartz monzonite	Zircon	SHRIMP	Foliated K-feldspar megacrystic hornblende quartz monzonite. Core, weighted average	Day and others, 2014; Dusel-Bacon and others, written communication, 2014	181.2	2.6
615	Point	1253	10AD-368	Eagle	64.2041	-142.828	Granite	Zircon	SHRIMP	Nonfoliated K-feldspar megacrystic hornblende-biotite granite porphyry. Core, weighted average	Day and others, 2014; Dusel-Bacon and others, written communication, 2014	183.4	3.6
619	Point	1254	8A5-4	Eagle	64.0599	-143.17	Monzonite	Zircon	SHRIMP	Foliated coarse-grained hornblende-biotite megacrystic monzonite. Core, weighted average	Day and others, 2014; Dusel-Bacon and others, written communication, 2014	184.5	3
620	Point	1257	08AD-100	Eagle	64.1016	-143.19	Tonalite dike	Zircon	SHRIMP	Foliated clinopyroxene-bearing tonalite dike. Core, weighted average	Day and others, 2014; Dusel-Bacon and others, written communication, 2014	184.8	2.9
622	Point	1017	91ADb 35	Eagle	64.1511	-143.127	Quart monzonite	Titanite	TIMS-multigrain	Two concordant titanites. Zircons have abundant inheritance, having an upper intercept of ~1.76GA, but are consistent with this age.	Dusel-Bacon and others, 2009	185.4	1.4
625	Point	1255	08ADb22	Eagle	64.093	-143.146	Quartz monzonite	Zircon	SHRIMP	Foliated K-feldspar megacrystic hornblende quartz monzonite. Core, weighted average	Day and others, 2014; Dusel-Bacon and others, written communication, 2014	186.2	3
626	Point	1025	98ADb15	Eagle	64.2	-141.411	Granodiorite	Titanite	TIMS-multigrain		Dusel-Bacon and others, 2009	186.7	1.6
627	Point	1015	07ADb01A	Eagle	64.2568	-142.7	Quart monzonite	Zircon	SHRIMP		Dusel-Bacon and others, 2009	187	3
628	Point	1027	91ADb10	Eagle	64.1692	-141.559	Monzonite	Titanite	TIMS-multigrain		Dusel-Bacon and others, 2009	187.3	0.6
630	Point	1271	LWM 07-09-208	Eagle	64.2338	-142.826	Dike	Zircon	SHRIMP	Altered biotite-bearing dike	Dusel-Bacon and others, written communication, 2014	187.7	2.3
633	Point	1026	91ADb10	Eagle	64.1692	-141.559	Monzonite	Zircon	TIMS-multigrain		Dusel-Bacon and others, 2009	188.4	1.2
634	Point	92	79AFr2010	Big Delta	64.63	-145.672	Granite	Zircon	U/Pb	Zircon (-325), 207Pb/235U	Aleinikoff and others, 1984b	189	3.78
638	Point	1258	09AD-240	Eagle	64.1877	-143.131	Granite	Zircon	SHRIMP	Foliated, medium-grained biotite granite. Core, weighted average. Inherited cores yield ages about 1 to 2 Ga	Day and others, 2014; Dusel-Bacon and others, written communication, 2014	190.5	4.8
642	Point	1020	93ADb18	Eagle	64.24	-142.197	Granite	Zircon	TIMS-multigrain		Dusel-Bacon and others, 2009	191.3	0.4
646	Point	1021	98ADb30	Eagle	64.3353	-141.843	Monzodiorite	Zircon	TIMS-multigrain		Dusel-Bacon and others, 2009	193.2	0.4
651	Point	1269	98AD296	Eagle	64.3604	-141.118	Leucogranite	Zircon	SHRIMP	Considered minimum age due to fractured nature of zircons. Inheritance was also apparent.	Day and others, 2002	196	4
652	Point	1024	00ADb18	Eagle	64.2676	-141.095	Granodiorite	Zircon	TIMS-multigrain	Foliated fine-grained Bt-Ep-Qtz-Ms-Pl granodiorite	Dusel-Bacon and others, 2009	197	3.94
653	Point	1023	00ADb41	Eagle	64.3535	-141.4	Granodiorite	Zircon	TIMS-multigrain	Foliated Qtz-Ms-Bt-Pl-Ep granodiorite.	Dusel-Bacon and others, 2009	197.2	2.5
659	Point	1018	93ADb09	Eagle	64.1422	-142.683	Granodiorite	Titanite	TIMS-multigrain		Dusel-Bacon and others, 2009	201	1.4
662	Point	413	2005(200)	Tanacross	63.9817	-142.152	Granodiorite	Zircon	U/Pb	200 mesh fraction	Aleinikoff and others, 1981a	203	4.06
663	Point	1262	09AD-319	Eagle	64.1104	-143.18	Quartz diorite	Zircon	SHRIMP	Foliated medium-grained hornblende quartz diorite. Rim, weighted average.	Day and others, 2014	203	4
673	Point	1259	09AD-338	Eagle	64.1051	-143.112	Leucotonalite	Zircon	SHRIMP	Foliated medium-grained hornblende leucotonalite. Core, weighted average.	Day and others, 2014; Dusel-Bacon and others, written communication, 2014	207.9	2.9
676	Point	1014	LWM-07-06-124	Eagle	64.2353	-142.827	Quartz diorite	Zircon	SHRIMP		Dusel-Bacon and others, 2009	210	3
677	Point	410	2005	Tanacross	63.9817	-142.152	Granodiorite	Sphene	U/Pb		Aleinikoff and others, 1981a	212	4.24
678	Point	1029	93ADb01	Tanacross	63.9931	-142.181	Quartz monzodiorite	Titanite	TIMS-multigrain		Dusel-Bacon and others, 2009	212	4.24
679	Point	1272	79Afr2005	Tanacross	63.9811	-142.152	Quartz monzodiorite	Zircon	SHRIMP		Dusel-Bacon and others, written communication, 2014	212	3.3
681	Point	414	2005(325)	Tanacross	63.9817	-142.152	Granodiorite	Zircon	U/Pb	325 mesh fraction	Aleinikoff and others, 1981a	213	4.26
687	Point	1260	08ADb24	Eagle	64.0892	-143.038	Granodiorite	Zircon	SHRIMP	Hornblende-biotite granodiorite. Core, weighted average.	Day and others, 2014; Dusel-Bacon and others, written communication, 2014	215	3.5
688	Point	1261	09AD-319	Eagle	64.1104	-143.18	Quartz diorite	Zircon	SHRIMP	Foliated medium-grained hornblende quartz diorite. Core, weighted average.	Day and others, 2014; Dusel-Bacon and others, written communication, 2014	215.5	3.4
689	Point	1019	93ADb10	Eagle	64.0383	-142.827	Granodiorite	Titanite	TIMS-multigrain		Dusel-Bacon and others, 2009	215.7	3.1
694	Point	412	2005(150)	Tanacross	63.9817	-142.152	Granodiorite	Zircon	U/Pb	150 mesh fraction	Aleinikoff and others, 1981a	222	4.44
700	Point	411	2005(100)	Tanacross	63.9817	-142.152	Granodiorite	Zircon	U/Pb	100 mesh fraction	Aleinikoff and others, 1981a	229	4.58
705	Point	1297	09LF206A	Nabesna	62.5878	-141.141	Amphibolite	Zircon	ICPMS	Diorite (amphibolite?) 40 percent 0.5mm hornblende, 60 percent 0.5mm plagioclase. No fabric. Age is weighted mean average of 20 out of 42 grains. As mapped, unit is thought to be Devonian.	Solie and others, 2014	241.9	13.46

## Sheet: Pliocene strata
AGE	± (1-s)	Uconc	U/Th	Conc
5.51496	0.430178	62.0575	2.40488	NA		893
5.78979	0.399649	63.1443	2.36113	NA
5.80887	0.313169	88.9609	1.49826	NA
6.19604	0.378881	103.003	2.18874	NA
6.30084	0.158783	834.99	1.82078	NA
6.30609	0.209788	326.72	1.49119	NA
6.33697	0.155175	611.428	1.66	NA
6.34825	0.427646	56.3562	3.49533	NA
6.36218	0.297752	89.4989	1.75474	NA
6.37852	0.422159	61.2031	1.10955	NA
6.38932	0.348032	102.565	3.68635	NA
6.45743	0.20718	2388.03	1.72704	-2.62321
6.46972	0.267261	135.609	1.98383	NA
6.56111	0.409887	88.1552	1.83684	NA
6.56558	0.178065	174.218	1.74043	NA
6.62222	0.187581	309.48	2.19369	NA
6.62796	0.34036	114.377	1.46792	NA
6.67107	0.436103	87.2194	3.26454	NA
6.78505	0.232716	225.1	2.34672	NA
6.83013	0.320307	312.67	1.40381	NA
6.85732	0.363841	222.993	0.924971	NA
6.92257	0.443138	141.149	1.85735	NA
6.92363	0.231826	163.368	3.19419	NA
6.97033	0.452604	63.0085	1.78461	NA
6.97666	0.501137	76.6341	1.91753	NA
6.98943	0.228709	184.454	3.06423	NA
7.00093	0.262998	167.431	1.5094	NA
7.08958	0.195969	271.765	2.47936	NA
7.10523	0.275119	210.18	2.54315	NA
7.11932	0.495423	90.9827	1.4552	NA
7.44974	0.716418	31.9269	2.12852	NA
8.02855	0.241748	216.229	2.93545	NA
8.06194	0.366373	191.148	4.16119	NA
8.10064	0.263861	149.087	2.28551	NA
8.26477	0.222318	290.442	1.53005	NA
8.51078	0.239911	293.336	2.28244	NA
8.5997	0.255146	230.973	2.45883	NA
8.61954	0.312057	131.66	3.5035	NA
8.72846	0.305389	145.888	4.27085	NA
8.78896	0.510171	177.314	2.12681	NA
8.87911	0.202984	385.162	2.59235	NA
8.88698	0.230806	169.496	2.22762	NA
8.96297	0.322907	218.221	3.42455	NA
8.98775	0.246658	189.49	3.32065	NA
9.01896	0.40468	171.281	2.71965	NA
9.22489	0.292252	177.962	3.67015	NA
9.24123	0.227169	241.294	4.01917	NA
9.31035	0.397619	60.1646	2.72248	NA
9.32338	0.208054	1243.04	2.42058	NA
9.46481	0.572165	142.582	3.60387	NA
9.5283	0.360496	139.145	2.00223	NA
9.73687	0.701498	216.688	1.55695	28.4697
10.6414	1.0107	112.386	4.11125	NA
11.0158	0.442037	222.543	2.99172	NA
11.2266	0.612949	69.4119	3.28059	NA
11.3713	0.474	131.83	2.65668	NA
11.4799	0.413661	172.92	1.94372	NA
11.7583	0.426087	144.408	2.02367	NA
11.8334	0.403507	130.176	2.66612	NA
11.9792	0.21998	443.877	1.20706	NA
12.1434	0.477429	87.3351	2.76362	NA
12.3598	0.426651	73.4307	3.62005	NA
27.1299	0.671296	176.108	3.03175	NA
29.1686	0.465661	771.465	3.39823	NA
29.5614	0.444147	839.315	3.38024	NA
33.6268	0.722131	102.35	2.33339	NA
33.8589	0.749907	255.135	1.73051	NA
34.0014	0.910094	133.155	1.53805	NA
34.0256	0.959026	137.953	1.50158	NA
34.3432	0.639211	253.356	1.46223	NA
34.3775	3.03774	203.599	5.72245	-6.23459
34.6755	0.665297	160.831	1.84252	NA
34.7947	1.00714	176.019	2.29464	NA
34.9934	0.835305	118.802	2.25655	NA
35.1419	0.93534	334.596	1.78377	NA
35.2667	0.769428	508.741	3.72206	NA
35.2804	0.681898	255.778	2.10639	NA
35.3611	0.86649	72.5202	2.08952	NA
35.4979	0.499328	331.161	1.54728	NA
36.1588	1.04206	581.677	3.6558	-11.3547
36.9901	0.765284	169.72	1.93854	NA
37.4938	0.658093	301.902	4.16667	NA
37.5887	0.721787	278.995	3.27076	NA
37.7915	0.694666	544.817	3.59546	NA
37.8072	0.729036	1022.62	2.51887	NA
38.0207	0.581515	691.089	3.97796	NA
38.0312	0.477963	1223.84	3.34313	NA
38.2114	0.805452	303.866	3.02827	NA
38.4206	0.662039	510.591	3.79633	NA
38.4868	0.777651	95.1011	1.72548	NA
38.6068	0.792093	806.537	2.45711	NA
38.6347	0.868279	388.149	3.61845	NA
38.935	0.718627	71.0542	3.45086	NA
39.2636	0.504065	1226	3.37236	NA
39.8505	0.98876	119.56	4.43289	NA
40.2273	0.523298	303.431	1.44794	NA
40.3953	1.34259	824.997	3.20638	NA
40.7765	0.832273	218.964	5.34497	NA
40.8571	1.39135	255.345	2.67678	NA
40.8826	0.734364	452.923	3.23298	NA
41.0777	0.772241	569.084	2.63295	NA
41.3935	0.746568	519.786	3.79791	NA
43.8014	1.70555	386.687	3.78903	NA
44.1904	1.30527	160.271	5.98637	NA
44.8524	3.20685	193.243	2.31493	NA
47.8375	2.98355	106.353	2.77568	-3.17376
49.847	0.826663	459.278	10.5304	NA
49.9698	1.34397	425.297	1.54257	18.1677
51.5076	0.664534	420.976	5.57241	NA
51.7365	0.672098	306.67	4.71129	NA
51.8019	1.21316	224.487	7.69164	NA
51.8389	0.805357	360.099	4.30571	NA
51.9026	0.87413	353.641	6.03288	NA
52.0051	1.01695	396.237	6.45642	NA
52.0115	1.27444	330.68	10.4625	NA
52.0515	1.1994	284.689	6.09489	NA
52.1154	1.04138	307.561	4.22971	NA
52.2432	1.38421	236.54	4.49156	NA
52.4801	1.01778	539.556	4.91754	NA
52.5541	1.34437	42.6757	4.76829	NA
52.7422	0.64083	1372.17	2.99731	53.6026
52.8726	1.67974	165.132	3.15861	-3.92684
52.9476	1.15856	245.804	4.74529	NA
53.0006	1.39023	93.7897	4.01278	NA
53.0365	0.825964	675.798	13.1476	NA
53.0682	0.986657	298.823	4.62491	NA
53.0771	1.2113	218.938	5.42223	NA
53.1325	0.849616	280.785	5.09931	NA
53.1413	2.52442	401.779	3.28887	36.4252
53.1467	1.17935	236.882	3.64262	NA
53.3447	0.67537	841.772	7.32637	NA
53.4883	0.83311	419.792	3.60444	NA
53.5756	0.972603	456.077	2.95406	NA
53.632	0.790461	408.899	2.16386	-28.2639
53.6559	1.25172	138.529	2.9815	NA
53.7791	1.05686	276.491	2.82588	NA
53.794	0.793808	265.052	6.48378	NA
53.934	0.736105	397.562	3.51205	NA
54.0344	1.52166	167.532	3.91635	NA
54.1297	0.863405	464.232	3.86492	NA
54.2247	0.81505	425.567	3.87896	NA
54.2484	1.15346	386.825	8.02921	NA
54.315	1.80109	921.549	7.98902	50.6239
54.5294	1.42116	160.09	4.23202	NA
54.9512	1.54132	180.914	3.35408	NA
55.0942	0.962153	168.798	3.63474	NA
55.1805	1.10989	1074.57	4.12507	51.0487
55.7062	0.660048	1048.42	9.67862	44.7807
55.7744	0.910754	358.427	2.69775	30.8721
55.926	1.15881	311.766	1.90261	NA
56.4441	1.15957	136.563	10.8576	NA
56.5347	1.49162	306.666	2.21583	44.6827
56.9995	0.543279	543.59	5.27364	NA
57.008	1.11586	225.255	4.01706	NA
57.2512	1.64246	63.6182	5.63338	NA
57.3082	0.81572	489.918	3.88593	NA
57.4536	0.983827	520.739	1.55445	NA
57.4774	1.1227	186.505	4.55638	NA
57.4895	0.77892	370.936	3.44047	NA
57.575	0.773746	353.638	4.0837	NA
57.6766	0.803871	622.346	2.82319	-282.724
57.8063	0.512177	891.709	2.33731	-264.508
57.9619	0.999406	318.091	2.51203	NA
58.2131	1.36549	206.124	2.76199	NA
58.3822	0.705347	371.868	2.50184	NA
58.5844	0.995439	773.497	1.99332	NA
58.6097	1.07027	771.761	2.98719	NA
58.6369	1.06983	431.268	1.8703	NA
58.8274	1.27075	1212.42	5.09327	41.0826
58.834	0.951834	407.425	3.01605	NA
58.9751	1.42456	320.639	8.85617	NA
59.2823	1.11274	183.383	4.45035	NA
59.6823	1.31871	257.726	2.74991	NA
59.7306	0.944639	239.602	5.09673	NA
59.9405	2.17769	313.319	4.21698	-17.3014
59.9862	0.794423	563.179	4.19995	NA
60.3619	1.2975	92.1508	8.77859	NA
60.4123	1.12609	614.283	3.60277	NA
60.4175	1.58962	141.905	1.07241	NA
60.638	1.99167	456.918	1.19756	43.1122
60.7449	2.00121	197.563	4.13298	35.5446
60.777	1.4397	607.5	3.41852	-646.132
60.8707	2.96863	84.2264	3.22404	3.38741
60.9911	3.5633	154.794	3.67592	-23.2631
61.402	1.38785	52.4279	2.23337	NA
61.8352	1.37838	325.977	6.56885	NA
61.9971	1.63366	385.344	4.28923	NA
62.0303	0.716101	1478.32	4.79651	106.212
62.0499	1.45617	256.794	2.78022	NA
62.1783	1.0276	705.155	4.97595	NA
62.9237	1.42218	223.955	3.05184	NA
63.1288	1.5908	96.9355	5.01601	NA
63.2155	0.937307	396.027	2.24859	103.069
63.2378	1.48702	104.743	4.75774	NA
63.2584	2.20951	573.86	2.08494	-79.3819
63.3871	1.79566	381.183	2.01882	NA
63.4298	1.27813	198.57	2.49505	NA
63.6076	1.5038	116.23	3.79935	NA
63.8024	1.0539	514.727	3.42588	19.9755
63.8435	0.863235	216.064	2.81031	NA
63.9232	2.30669	518.364	4.09649	NA
63.9973	3.74232	239.46	3.5117	NA
64.111	3.78294	114.055	2.26937	-22.9019
64.1549	1.97894	359.717	2.94306	179.572
64.1818	0.581157	570.905	2.91562	-77.1183
64.6178	0.874672	766.355	2.17456	NA
65.1643	0.851669	471.792	1.79909	NA
65.1689	1.1799	416.16	2.49122	NA
65.2691	0.83117	840.641	2.87134	NA
65.4085	1.67178	128.025	4.69469	NA
65.5617	1.45619	657.585	1.48889	NA
65.7371	0.96453	218.414	4.80345	NA
65.9553	0.728371	2102.58	4.42041	47.375
65.9606	1.11956	184.065	1.58176	NA
66.0515	1.22209	675.296	3.81542	NA
66.1714	1.39955	444.285	2.59098	NA
66.6937	0.583879	1730.58	3.67074	-84242.6
66.8679	0.843548	307.888	10.0781	NA
66.9811	1.06255	167.269	4.932	NA
67.1452	1.1489	341.048	2.51686	-53.5589
67.1643	1.01523	340.99	3.19798	NA
67.18	4.89124	39.757	1.23405	NA
67.2855	1.09452	459.645	2.6543	NA
67.2887	1.33097	251.03	3.00703	NA
67.3423	5.02557	208.019	7.69157	NA
67.5261	6.63676	79.2967	1.60864	-5.41276
67.7527	0.817095	514.27	2.70528	NA
67.8014	1.17514	134.614	1.65564	NA
68.0943	1.74539	364.012	3.58987	NA
68.1633	3.13255	192.599	2.89653	-31.2084
68.225	1.1451	424.163	2.12881	NA
68.6827	0.94831	385.835	2.89111	NA
68.8004	1.78045	237.873	3.08435	NA
68.8379	1.67827	112.762	3.18721	NA
68.8616	1.29761	213.253	3.09635	NA
68.877	1.18431	357.578	1.87803	NA
68.997	1.50528	277.783	2.7723	NA
69.0343	0.914075	636.835	4.06857	NA
69.0787	1.3742	5784.57	6.78172	68.585
69.1339	0.891498	268.082	3.29628	NA
69.2973	5.90698	123.481	1.93961	20.9117
69.6465	2.74344	1109.68	3.50598	NA
69.7514	1.706	100.358	5.13119	NA
69.7633	5.3775	161.218	3.8888	-469.813
69.7703	1.33336	255.75	1.87871	NA
69.8077	1.5644	127.168	2.70072	NA
69.8251	1.53481	908.837	1.9905	533.669
69.9734	1.61117	72.1806	2.03799	NA
70.2319	1.33046	305.457	3.64457	NA
70.3178	1.16793	469.847	9.25694	37.4703
70.3749	1.7336	67.1374	1.80596	NA
70.4724	2.57036	300.221	2.02229	NA
70.4851	1.11489	567.985	1.87042	NA
70.6041	1.05328	574.031	3.21219	756.993
70.6427	2.11583	152.838	2.52764	NA
70.889	1.54563	261.859	5.254	NA
70.9275	1.17242	427.691	4.21784	NA
71.2587	2.32653	110.963	3.27491	NA
71.4217	1.87166	59.9153	2.42054	NA
71.4922	1.17787	188.081	2.99714	NA
71.5204	1.8314	600.773	1.91771	NA
71.5212	1.45049	168.058	3.14088	NA
71.5683	1.71314	122.638	2.92598	NA
71.7272	1.7232	331.815	3.60302	NA
71.781	1.35452	47.9382	1.62404	NA
71.8874	2.0301	290.267	6.02294	NA
71.9132	1.9036	24.8017	1.7098	NA
72.2643	1.40307	96.6263	4.81492	NA
72.3162	1.42533	252.673	2.46319	NA
72.3985	2.39448	33.5266	3.27269	NA
72.4332	1.99049	66.1558	3.1495	NA
72.4472	1.70183	68.3612	2.69586	NA
72.4547	1.30285	378.024	8.80048	NA
72.4673	1.323	96.9387	2.00258	NA
72.4683	2.41556	76.669	1.5289	NA
72.505	1.65935	128.343	3.79999	NA
72.5102	1.43195	163.757	4.79991	NA
72.5821	1.65231	529.646	4.36751	NA
72.5927	1.55544	174.106	4.80666	NA
72.739	1.23884	88.347	1.97737	NA
72.8173	1.40719	42.5655	2.59069	NA
72.8897	1.16943	192.322	3.62902	NA
72.9459	1.05265	737.504	2.78936	NA
73.0633	1.00586	261.01	2.93465	NA
73.0775	2.5244	98.559	1.73085	NA
73.0861	1.35838	259.024	2.62564	NA
73.1304	1.60894	684.351	1.26859	NA
73.1908	1.42505	119.275	3.26232	NA
73.2857	2.18612	772.256	3.72166	-146.208
73.3589	1.79657	510.941	4.60819	NA
73.5377	1.1912	281.042	2.73675	NA
73.6176	1.90832	54.8011	2.08666	NA
73.6806	1.01412	338.107	6.79991	NA
73.7099	1.30064	315.244	6.13191	NA
73.7477	1.26139	132.329	4.1769	NA
73.7886	1.35744	642.152	4.28138	NA
73.8094	0.856648	1055.19	2.73154	NA
73.8451	2.53887	42.2122	2.68889	NA
73.8592	2.55138	187.495	3.18359	NA
73.8884	1.97899	58.8721	2.3344	NA
74.1024	1.81057	330.201	3.04386	NA
74.2014	1.98722	114.176	2.41641	NA
74.2025	2.15152	117.139	1.87313	NA
74.2038	1.48716	142.668	5.54622	NA
74.2479	1.4965	157.892	3.73105	NA
74.2512	1.26767	119.064	1.31675	NA
74.394	1.41811	194.052	2.09206	NA
74.4551	1.77259	73.9278	3.59953	NA
74.5135	1.06584	171.577	1.79178	NA
74.5167	1.71454	372.304	4.1434	NA
74.6294	1.25051	499.918	5.59617	NA
74.9682	3.33223	28.6878	1.71185	NA
75.0502	1.41339	57.9699	1.36161	NA
75.1402	1.09009	194.441	3.80935	NA
75.2645	1.55951	1823.62	4.71582	NA
75.2699	1.86734	38.671	1.75448	NA
75.5522	1.74589	294.605	2.75618	NA
75.6487	1.81456	274.457	6.36011	NA
75.6593	2.19986	134.887	2.41618	NA
75.744	2.30315	48.9379	2.89995	NA
75.873	2.13827	35.1972	1.74273	NA
75.9532	2.25851	43.6394	1.89865	NA
75.966	2.00896	57.1519	1.97785	NA
76.0637	0.839346	2031.87	3.36626	54.0174
76.1527	1.77759	86.8945	2.82759	NA
76.1751	3.14666	62.1226	1.71169	NA
76.1768	1.72141	46.2673	1.56421	NA
76.2352	2.11371	50.4859	1.50452	NA
76.3383	1.1579	850.925	2.23251	NA
76.3986	1.39863	181.852	2.26867	NA
76.5054	1.45815	110.87	2.60533	NA
76.5141	2.29267	76.4865	1.89693	NA
76.5763	1.58677	204.361	2.35057	NA
76.6518	2.0793	26.0871	1.93994	NA
76.6788	1.51587	48.3047	2.12674	NA
76.7552	1.08561	242.357	5.07427	NA
76.8818	2.11861	53.7476	1.8497	NA
76.9479	1.35091	56.9581	2.86141	NA
76.9643	1.71133	97.8275	3.46717	NA
77.0475	1.23404	72.2721	2.41544	NA
77.0839	1.42219	68.3978	2.67186	NA
77.1227	1.95172	70.1191	3.53044	NA
77.2194	3.93075	552.936	48.6804	NA
77.2278	2.11773	82.8172	1.90218	NA
77.3303	1.57816	83.981	1.95703	NA
77.3339	1.84445	72.6361	2.01031	NA
77.3492	2.4934	32.3909	2.12852	NA
77.3725	2.46952	33.4708	1.72679	NA
77.5589	2.3567	60.8616	1.37187	NA
77.6273	1.52933	140.717	1.96218	NA
77.7502	1.87962	341.019	2.93397	NA
78.4289	2.92238	32.9161	1.59821	NA
78.4422	1.59052	213.482	3.99316	-438.648
78.5349	2.13613	154.501	6.7419	NA
78.5413	1.92315	223.235	2.55441	NA
79.0245	2.21208	69.1919	1.43959	NA
79.3833	1.13823	274.21	3.53717	NA
79.4821	1.80712	232.952	1.81216	NA
79.6721	3.34147	117.365	2.28019	-27.9909
79.973	1.19309	475.06	5.04055	NA
80.1135	1.24596	101.088	2.10507	NA
80.3498	2.21858	144.604	1.99591	NA
80.4764	1.72619	128.15	3.08883	NA
80.6581	1.46685	346.868	2.52218	35.9884
80.7063	2.1364	100.779	1.61588	NA
80.7416	1.86952	106.378	3.51953	NA
80.8634	1.51606	49.7078	2.60177	NA
81.0118	3.08657	46.7027	2.12007	NA
81.0739	1.26734	363.862	9.45589	NA
81.0987	2.50078	65.1317	4.95373	NA
81.1027	2.55526	58.5871	2.81366	NA
81.2388	1.44427	694.308	5.10736	NA
81.29	1.83726	78.4192	1.82307	NA
81.4054	2.02288	60.4968	2.26663	NA
81.6928	1.58515	96.2654	2.50497	NA
81.755	2.86294	59.4343	2.66652	NA
81.7611	2.46929	155.28	2.14677	NA
81.8091	2.29977	148.874	1.51428	NA
82.2468	1.58031	94.7995	1.51976	NA
82.2788	2.61646	51.7716	1.26081	NA
82.5113	2.16707	115.174	2.0341	NA
82.6624	1.76817	153.639	1.95691	NA
82.8342	1.87478	126.208	2.17332	NA
82.8717	1.68375	84.1505	2.37474	NA
83.0175	2.19626	84.2407	1.58552	NA
83.0314	2.90021	38.9118	1.85482	NA
83.1284	3.47507	298.783	3.20558	NA
83.2032	1.52631	77.6052	3.85623	NA
83.3447	1.38283	75.6653	3.53637	NA
83.5354	1.90842	41.8085	3.69479	NA
83.722	0.998168	505.701	1.75577	84.6823
83.8254	1.40289	109.714	2.4492	NA
84.095	2.69762	107.142	2.62584	NA
84.1494	1.626	74.0546	3.60932	NA
84.2288	2.87862	249.438	2.4908	39.1707
84.2639	1.23899	186.962	2.3761	921.757
84.4763	1.76118	65.993	2.36296	NA
84.617	1.65661	114.749	2.53286	NA
84.627	1.91695	137.22	1.9668	NA
84.6482	2.0989	70.4609	2.08047	NA
84.7051	1.99522	211.198	1.82886	NA
84.7835	1.42723	288.877	1.95642	NA
84.8257	1.59256	180.438	3.03767	NA
84.9372	1.85531	73.6819	1.81948	NA
85.0716	2.60956	339.842	1.87088	NA
85.1444	1.81857	263.931	4.54789	39.4477
85.318	1.37482	120.514	1.94521	NA
85.4952	3.38884	37.2469	1.43301	NA
85.5139	1.5264	81.7494	1.60578	NA
85.5453	1.90881	156.183	1.9823	NA
85.6242	1.8038	52.4164	1.72028	NA
85.8148	2.07124	153.879	2.94821	NA
86.0244	1.78213	88.3446	2.0991	NA
86.0591	1.49015	150.584	1.91688	NA
86.1212	1.93687	166.024	2.16761	NA
86.1873	2.36633	38.2602	2.35399	NA
86.2354	2.36173	150.913	3.11562	NA
86.3912	1.85288	142.361	2.07515	NA
86.5492	2.01584	126.844	1.9716	NA
86.5551	2.71871	54.6863	2.42096	NA
86.6497	2.65206	78.3481	2.80081	NA
86.6966	2.08817	202.431	2.89151	NA
86.74	1.91689	196.448	2.05125	NA
86.8544	2.39398	130.75	1.74237	NA
86.8941	2.33826	22.6882	2.35336	NA
87.1085	4.24211	61.0804	1.65808	NA
87.2425	3.83881	111.305	2.19026	-30.6922
87.2701	2.41296	29.6942	2.02	NA
87.3978	1.34032	208.85	1.86607	NA
87.4003	2.02615	66.8706	1.87049	NA
87.7271	1.50681	65.8314	2.01787	NA
87.833	1.48763	82.9358	3.7057	NA
87.9115	1.72707	121.766	3.10833	NA
87.9879	2.18968	60.8032	1.93671	NA
88.098	2.1575	124.909	2.16016	NA
88.1475	1.97056	137.164	2.38322	NA
88.5321	1.62312	205.411	2.11748	NA
88.5603	1.61277	96.1904	1.44744	NA
88.5977	2.43276	56.9508	2.17769	NA
88.6453	2.01775	69.7152	2.48243	NA
88.6629	1.83019	79.6423	2.99097	NA
88.6801	2.09768	59.6697	1.55898	NA
88.7025	4.53174	20.8407	2.51202	NA
89.0077	2.30634	133.627	1.69697	NA
89.1366	2.43814	100.76	2.27265	NA
89.3548	2.50524	124.22	3.54887	NA
89.4313	1.50942	140.137	2.07896	NA
89.6193	2.37384	282.403	2.33316	NA
89.6735	2.02793	124.783	1.45197	NA
89.8971	2.07999	140.77	1.56713	NA
90.2255	1.79812	56.92	1.89755	NA
90.3258	2.51933	110.227	3.67169	NA
90.443	1.50365	366.6	3.55489	NA
90.4563	1.80133	110.695	2.17603	NA
90.62	1.62139	63.7107	2.06309	NA
90.6223	1.79292	76.7652	2.15793	NA
90.6546	2.30298	131.251	1.402	NA
90.6802	2.37773	68.3635	2.35521	NA
90.8021	1.41671	229.283	1.14877	NA
90.8303	1.85724	60.7638	1.88786	NA
90.8593	2.06641	83.2896	1.58502	NA
90.994	1.76598	144.735	2.5263	NA
91.1537	2.39001	89.4078	2.64445	NA
91.1543	1.59346	199.158	2.64764	NA
91.3084	1.98578	203.478	1.35904	NA
91.5078	2.80281	132.645	1.4781	NA
91.5641	2.50944	34.3504	1.84113	NA
91.6775	2.3211	109.189	1.50226	NA
91.71	1.8347	64.9404	2.55735	NA
91.7136	1.16609	443.006	1.86191	NA
91.7888	2.72927	66.9201	1.80343	NA
92.2761	1.75475	54.8812	2.28836	NA
92.662	1.69194	433.951	3.50582	NA
92.6637	1.899	80.4788	2.77611	NA
92.7527	1.83035	134.942	4.4843	NA
92.8764	1.48608	262.041	1.10014	NA
93.0158	1.62908	180.438	1.97325	NA
93.3191	2.55028	280.197	2.82112	NA
93.3766	1.69648	224.802	2.64867	-83.3111
93.4684	2.07945	46.6728	1.51857	NA
93.5	1.38373	68.2139	1.70251	NA
93.7405	2.41313	70.2964	1.67958	NA
93.821	2.99741	35.9149	2.64655	NA
94.0484	2.43265	35.1241	2.35425	NA
94.0611	2.87341	41.8148	2.89112	NA
94.1333	1.29936	396.477	7.42932	NA
94.3364	2.17559	319.07	2.78564	NA
94.3495	1.91178	55.3174	2.30929	NA
94.4017	1.41862	555.186	4.2565	NA
94.5028	2.59336	203.565	3.4075	NA
94.547	1.85469	97.433	3.77791	NA
94.5808	2.26006	85.0749	4.2799	NA
94.5848	1.27755	998.772	6.20446	NA
94.6477	1.35297	542.867	5.11283	2853.94
94.6697	0.714233	401.893	3.91943	132.262
94.8776	1.20532	541.512	6.02127	NA
94.9616	1.51866	351.099	1.29265	NA
95.2487	2.36909	1682.89	5.26464	NA
95.3284	1.07875	187.338	1.69728	227.576
95.3619	2.94291	55.8292	2.32637	NA
95.3692	2.26255	333.414	3.39364	47.2664
95.4854	1.27955	216.779	2.94851	-73.7995
95.6531	2.30728	83.249	3.0707	NA
95.7103	1.1021	715.34	5.18354	NA
95.9555	0.882712	1052.68	2.84932	NA
96.1088	1.45608	631.913	4.30368	NA
96.1172	1.06581	1086.82	4.73241	NA
96.2197	2.62932	42.0302	1.71757	NA
96.2388	0.697325	429.702	3.61028	196.704
96.2617	1.74099	267.24	3.08528	NA
96.2923	1.58197	618.839	4.86113	NA
96.3404	1.82642	1068.86	2.67537	78.0663
96.4294	1.77125	1356.85	3.54766	NA
96.6753	0.9935	444.482	2.64537	NA
97.1213	2.4776	100.682	2.87163	NA
97.2187	2.31574	571.498	5.47388	261.917
97.2281	2.15398	114.701	2.15608	NA
97.28	3.32857	126.2	1.69738	NA
97.2906	1.25296	382.328	5.06731	NA
97.5072	1.42673	472.561	4.29857	NA
97.5095	1.36497	614.597	3.77013	NA
97.7373	1.43501	279.472	2.71737	NA
97.8234	2.66467	69.4431	2.37635	NA
98.084	1.599	224.376	1.60383	NA
98.1027	2.23122	58.983	2.23053	NA
99.0493	1.13796	450.819	4.66162	NA
99.8141	1.664	261.774	4.14202	NA
100.307	2.04746	128.31	1.52826	NA
100.579	3.34052	94.0996	2.28296	NA
101.652	1.974	117.842	2.1278	NA
101.994	4.51047	56.9838	3.54358	NA
102.125	8.17803	38.825	3.04953	NA
103.367	1.96829	516.615	2.39695	NA
104.836	1.29833	1010.82	2.49479	NA
104.861	1.36342	220.775	3.49482	NA
109.226	6.42888	62.5656	4.10836	NA
109.285	3.13713	55.439	5.51592	NA
113.616	2.39895	125.784	2.19514	NA
114.028	1.40917	1137.87	1.41911	NA
119.095	2.2362	364.652	3.42032	NA
125.156	2.24697	196.872	1.99888	NA
125.601	5.49516	87.4358	3.40373	NA
126.151	5.6466	99.5175	3.7958	-40.1229
134.736	5.9602	80.6775	2.02663	-107.069
134.739	7.25375	87.3417	3.43741	-56.3858
136.838	9.59957	58.1289	2.46578	-73.4566
137.049	4.01155	76.5504	1.86462	NA
137.496	9.33238	81.7387	2.2179	-53.6747
137.517	3.637	116.211	2.61367	NA
138.932	2.34244	63.4447	2.05104	NA
139.264	2.81905	85.5591	2.26827	NA
139.288	3.48658	86.3039	1.71279	NA
139.52	2.98199	229.498	1.37983	NA
139.81	2.75958	65.672	2.36594	NA
141.013	4.45041	55.8526	1.95066	NA
141.042	3.19165	58.0855	2.76068	NA
141.309	3.57814	285.817	1.18262	184.197
141.31	4.69916	117.732	1.32942	NA
141.411	2.41658	71.2515	2.34089	NA
141.979	3.63919	120.378	2.04079	NA
142.057	2.47115	254.29	1.76571	NA
142.141	3.66305	81.2468	2.86811	NA
142.356	3.22452	86.9325	1.92776	NA
142.39	3.72656	125.949	3.43385	NA
142.585	3.08195	283.267	1.29272	NA
142.906	3.14113	153.169	3.37753	NA
143.041	4.00799	145.865	1.76136	NA
143.076	3.09968	58.5498	1.768	NA
143.191	3.1202	192.995	1.46151	NA
143.533	3.39453	50.5817	1.98392	NA
143.7	5.82373	37.2655	1.69932	NA
143.751	3.42287	66.1588	2.21411	NA
144.015	2.96425	114.764	1.61519	NA
144.176	3.21303	48.9749	3.60604	NA
144.271	3.43229	110.154	3.43948	NA
144.511	3.01975	123.658	1.4407	NA
144.637	3.33165	238.643	39.7349	NA
144.652	2.03975	131.285	2.15662	NA
144.684	4.18904	95.9298	2.39145	NA
144.997	3.67642	266.277	1.93234	NA
145.256	2.58891	88.0613	2.46786	NA
145.64	2.87057	73.592	3.6372	NA
145.691	3.59193	61.7387	1.28223	NA
145.713	3.58875	177.611	2.8704	NA
145.791	4.83144	71.1046	2.26501	NA
145.882	3.61643	62.7692	2.16199	NA
146.082	3.34542	292.567	2.49265	NA
146.196	2.09875	179.768	3.42666	NA
146.509	2.25977	293.634	9.29276	10.0401
146.606	2.30473	345.567	3.9207	39.9648
146.869	3.74331	108.123	1.55146	NA
147.268	2.72328	105.556	1.32955	NA
147.401	2.7497	108.353	2.57075	NA
147.482	2.81143	330.758	2.25047	NA
147.702	2.86129	82.6749	5.58914	NA
147.808	6.5812	38.9957	3.07324	NA
147.955	3.31037	78.9356	2.94234	NA
148.074	2.73208	96.4241	2.26653	NA
148.106	2.993	151.54	3.07397	NA
148.172	2.68073	80.8107	1.37252	NA
148.275	2.43138	133.833	3.00043	NA
148.313	3.89614	67.6908	2.872	NA
148.352	3.22629	83.083	1.62944	NA
148.4	2.66703	219.352	6.17197	NA
148.457	4.01691	120.552	1.01406	NA
148.47	2.85906	79.625	2.33883	NA
148.494	3.68126	104.468	2.47281	NA
149.361	3.64749	150.733	2.83468	NA
149.416	3.47145	115.444	1.3527	NA
149.484	3.4332	98.1475	3.02819	NA
149.739	3.84837	95.7993	2.82367	NA
149.74	3.81379	57.4239	2.88134	NA
149.746	2.01921	153.106	1.4124	NA
149.826	2.31148	127.982	5.35672	NA
149.928	3.11671	54.8993	4.98311	NA
150.01	3.31303	100.758	2.72275	NA
150.317	3.14766	62.7832	2.4295	NA
150.537	3.27207	83.048	3.06151	NA
150.816	3.30449	130.811	3.149	NA
150.913	1.66715	178.743	5.50135	NA
151.045	2.12359	108.749	2.0875	NA
151.109	3.26006	28.7479	2.75403	NA
151.177	1.88332	118.75	2.1728	NA
151.201	10.1366	500.471	3.93449	NA
151.299	3.50402	103.319	2.51652	NA
151.367	1.15196	130.602	2.01021	66.1053
151.612	3.52799	139.55	2.85235	NA
151.758	5.36887	103.667	2.54619	NA
151.947	3.06327	39.5516	1.9737	NA
152.154	2.92175	42.3237	2.43925	NA
152.157	3.67981	37.3673	5.8042	NA
152.357	3.11911	36.8856	3.18929	NA
152.559	4.35478	70.3322	3.9205	NA
152.704	4.54203	79.6635	3.36235	NA
152.867	2.08475	198.339	2.4642	63.5311
153.737	4.16257	316.867	2.81139	95.3392
153.824	4.80226	64.6676	2.97361	NA
153.914	1.38403	718.943	3.05736	129.705
154.118	4.24495	89.4286	2.89988	NA
154.227	3.22387	113.49	2.52094	NA
154.29	2.74122	96.8213	1.6935	NA
154.315	2.86481	28.3093	2.4566	NA
154.532	0.977249	390.196	1.75178	94.2164
154.713	4.37389	46.0796	2.34757	NA
154.872	2.87231	86.4535	2.09912	NA
154.953	4.25918	83.7003	1.86183	NA
155.227	5.17226	49.4849	2.54325	NA
155.356	2.05744	111.37	2.48595	NA
155.407	3.48193	123.755	1.62382	NA
155.429	3.0543	90.493	0.452451	NA
155.555	3.02648	58.1328	1.84305	NA
155.575	3.2126	596.705	8.94884	168.781
155.593	2.36804	245.009	3.30241	NA
155.931	3.20138	65.0918	3.55124	NA
156.001	3.55485	157.051	3.50649	NA
156.053	3.3611	302.352	2.22568	157.635
156.13	3.71291	34.9912	3.22412	NA
156.228	3.10331	67.6568	2.20162	NA
156.469	4.34359	95.6975	2.43638	NA
156.594	4.33445	41.909	2.58696	NA
157.017	5.53761	57.3423	2.71777	NA
157.074	3.5617	48.3241	2.49673	NA
157.451	3.50975	108.93	3.03269	NA
157.485	2.4875	209.263	5.63915	NA
157.561	2.34997	121.154	2.50471	NA
157.64	3.31183	48.1241	1.97578	NA
157.706	4.14474	109.681	3.37949	NA
157.739	3.89476	329.172	1.4846	NA
157.978	3.01899	78.6378	1.87834	NA
158.04	5.16751	212.728	2.18671	199.909
158.161	5.77823	40.8915	2.48874	NA
158.486	4.85055	44.7828	2.6162	NA
158.692	2.33565	305.342	10.5117	242.528
158.738	3.68598	101.877	7.91499	NA
158.876	2.81896	66.5173	2.06568	NA
159.011	4.91362	83.7944	2.09977	NA
159.046	3.67459	133.841	4.61594	NA
159.255	2.20763	168.565	2.82577	NA
159.299	3.00662	33.7729	3.1609	NA
159.594	3.52269	50.4141	2.96315	NA
160	2.393	108.5	1.80718	NA
160.022	6.08262	83.6369	1.90083	NA
160.032	2.55911	115.429	2.13302	NA
160.096	4.42136	60.67	1.78833	NA
160.128	2.54871	56.7221	2.91126	NA
160.132	1.65972	506.296	13.0618	NA
160.144	4.54514	75.506	3.64593	NA
160.273	5.847	25.2358	2.74316	NA
160.346	8.36832	660.449	13.1482	NA
160.598	3.37375	59.8089	3.77114	NA
160.709	2.57066	76.3261	1.88797	NA
160.889	4.24495	87.5457	4.71805	NA
161.007	3.19755	84.1226	2.95309	NA
161.11	3.94833	148.662	2.8705	NA
161.117	2.68708	84.4874	2.22485	NA
161.221	3.16107	47.3512	2.75517	NA
161.408	3.50651	47.5932	4.67765	NA
161.513	2.91076	27.1168	2.75464	NA
161.521	3.79353	35.0096	2.99915	NA
161.619	5.61844	57.8155	2.65999	NA
161.645	3.66832	39.3747	3.12232	NA
161.733	3.27396	117.252	2.32729	NA
161.78	3.62505	34.6743	3.4737	NA
161.789	4.5099	63.1752	2.56669	NA
161.905	4.30381	67.2406	2.0963	NA
162.177	6.1834	62.7185	2.1391	NA
162.185	3.97	102.724	2.03736	NA
162.273	4.36633	103.053	2.08979	NA
162.303	4.55409	78.8242	1.96613	NA
162.364	3.41465	55.4917	2.58857	NA
162.461	5.76378	59.6053	2.05609	NA
162.462	3.75497	156.547	4.8568	NA
162.529	3.46373	86.9309	2.02452	NA
162.633	2.42786	64.9902	3.06602	NA
162.874	3.20241	192.563	2.49208	NA
163.036	3.4583	98.5019	3.97035	NA
163.057	2.35291	82.5807	2.44869	NA
163.141	3.72422	95.9027	2.83114	NA
163.242	6.45368	58.3192	2.51288	NA
163.283	3.54903	90.1009	2.99997	NA
163.312	3.74416	117.734	1.59465	NA
163.535	4.03456	125.889	1.9315	NA
163.635	4.86698	68.4903	2.25231	NA
163.636	3.17697	118.282	2.76206	NA
163.645	4.03002	50.9408	2.9374	NA
164.159	3.49434	45.1507	2.53554	NA
164.246	3.3813	135.873	3.32816	NA
164.257	5.84933	45.1776	1.77855	NA
164.277	2.76125	129.278	4.31661	NA
164.386	3.32597	34.4296	3.13013	NA
164.394	4.03244	58.4749	1.91096	NA
164.567	5.52487	55.9099	1.98511	NA
164.577	3.85401	94.9878	2.95371	NA
164.664	2.78406	125.105	1.94082	NA
164.665	5.51525	61.8897	2.44959	NA
164.783	3.17523	81.3133	2.36076	NA
164.818	4.88519	71.2346	1.76675	NA
164.823	2.86833	138.939	3.71945	NA
164.905	4.5042	102.494	2.09438	NA
164.94	6.13267	59.0107	2.45414	NA
164.951	3.79693	82.4733	1.80358	NA
165.053	3.36436	123.094	2.00935	NA
165.183	3.67226	29.6367	4.04351	NA
165.201	5.31259	55.8629	2.54792	NA
165.263	5.79863	31.9644	6.1024	NA
165.383	3.36348	66.3985	3.27559	NA
165.438	6.61997	43.457	2.783	NA
165.646	3.90354	40.3081	3.19992	NA
165.665	5.16794	61.9285	2.76415	NA
165.694	5.28006	70.0446	2.48156	NA
165.842	4.01898	92.3848	3.39827	NA
165.879	3.49806	33.0529	2.98233	NA
165.915	5.06546	63.0045	1.79949	NA
166.056	5.30794	70.1621	3.22482	NA
166.18	3.36628	134.036	2.47452	NA
166.231	3.72094	45.1044	2.69583	NA
166.264	3.85291	44.0307	3.08842	NA
166.425	4.4708	88.6514	2.5193	NA
166.556	5.14052	55.6487	3.73427	NA
166.604	2.90758	36.5288	5.08822	NA
166.888	6.17852	41.8056	2.35022	NA
166.888	5.32324	58.8208	2.69745	NA
166.937	2.95699	61.1865	2.92983	NA
167.414	3.81408	50.4625	2.16743	NA
167.521	4.26493	110.958	3.05235	NA
167.82	3.12945	77.2533	2.07977	NA
167.885	4.64844	69.7671	2.54454	NA
167.94	3.41384	137.751	2.14257	NA
168.117	4.27351	76.1995	1.88439	NA
168.212	4.77424	70.6811	2.15679	NA
168.509	4.41884	62.7118	2.66101	NA
168.56	2.64554	27.1836	2.74444	NA
168.683	5.54679	82.523	2.41734	NA
168.695	3.06256	45.0999	1.86436	NA
168.773	5.34479	61.0672	2.36048	NA
168.871	5.5402	98.7256	1.99602	NA
168.944	4.10237	86.6612	1.93309	NA
168.994	1.88292	127.263	4.74897	NA
169.132	6.1831	47.2159	2.5335	NA
169.498	4.34642	91.3871	2.65556	NA
169.63	4.18499	77.4432	2.0353	NA
169.646	2.70084	118.281	2.12573	NA
169.66	2.34339	109.43	2.63691	NA
169.74	3.4898	73.679	3.04316	NA
169.751	4.50687	109.059	2.8895	NA
170.298	10.1062	72.4396	2.46201	NA
170.331	2.63278	76.3296	2.77758	NA
170.51	5.0023	51.5194	3.77025	NA
170.579	4.21133	66.9444	2.65108	NA
171.075	4.10823	51.2818	3.06529	NA
171.103	4.32844	72.2056	3.31775	NA
171.13	2.81327	117.97	2.16804	NA
171.271	3.35787	50.0937	2.84064	NA
171.341	5.20973	65.2219	1.9974	NA
171.39	3.36705	126.279	1.9946	NA
171.464	4.09075	67.8324	2.05612	NA
171.694	6.17986	76.7935	2.19432	NA
171.731	3.25785	137.286	3.8164	NA
171.858	3.44757	96.9602	4.273	NA
172.058	3.10309	49.5034	2.47744	NA
172.145	4.02478	111.178	4.05951	NA
172.259	2.63908	153.936	2.662	NA
172.503	4.9019	68.2906	3.3709	NA
172.73	2.93538	69.6425	2.65428	NA
172.841	3.17046	57.8604	3.31981	NA
173.014	3.9274	69.9989	2.76798	NA
173.071	2.88231	121.872	2.44558	NA
173.253	3.76575	212.39	2.7971	NA
173.259	4.72494	62.7257	2.55671	NA
173.259	3.08401	60.5745	2.37026	NA
173.299	5.05501	50.4282	2.68424	NA
173.476	4.40004	73.4384	2.79793	NA
173.647	4.56406	66.3245	1.91947	NA
173.703	3.43616	281.549	4.20992	NA
174.072	4.1909	130.507	4.079	NA
174.362	3.31466	99.0017	3.08323	NA
174.756	3.86575	111.281	2.10558	NA
174.974	5.35442	56.2347	2.69928	NA
175.203	2.62848	80.0305	2.25862	NA
175.247	5.73982	62.9277	3.11788	NA
175.322	4.87942	86.3114	2.33567	NA
175.39	3.22174	169.368	3.20927	NA
175.583	5.18022	68.6047	2.27644	NA
175.677	3.24583	61.1064	2.5441	NA
175.73	3.15508	83.1652	3.09499	-4876.13
175.732	3.6576	28.7711	3.04939	NA
175.85	4.47058	56.1768	3.06437	NA
176.073	3.69526	84.3152	3.4141	NA
176.325	4.52966	89.2222	2.04134	NA
176.523	5.46823	51.6271	4.44412	NA
176.872	5.4672	46.2903	3.08988	NA
176.915	4.93008	147.804	2.51586	NA
177.429	4.85659	75.0254	2.63006	NA
177.753	2.9821	168.282	2.70084	NA
177.836	4.35404	105.881	7.4072	NA
177.877	3.00519	110.195	2.43411	NA
177.985	5.30263	65.3133	3.1016	NA
178.016	4.61674	57.8212	3.10655	NA
178.075	5.67586	52.8371	2.90489	NA
178.156	4.76181	64.2518	4.1554	NA
178.498	3.93281	162.323	2.39995	NA
178.543	4.0464	79.1265	4.58898	NA
178.796	3.61522	56.4164	3.7688	NA
178.951	3.83668	70.605	2.26893	NA
179.063	3.28474	114.615	1.19188	186.412
179.101	2.91763	158.507	2.88346	NA
179.756	2.97162	55.2695	4.48191	NA
179.945	5.33367	52.5829	3.35156	NA
179.963	3.95004	87.5271	2.06459	NA
179.991	2.61712	65.0897	8.10912	NA
180.077	3.89251	79.3154	2.46997	NA
180.364	3.36951	108.743	2.20518	NA
180.561	6.86055	56.2913	3.57015	NA
180.965	3.3405	122.749	2.14894	NA
181.635	4.41776	88.8842	3.417	NA
181.81	6.38448	62.6974	2.10931	NA
182.167	2.94354	151.053	2.43107	NA
182.173	5.50323	66.443	3.66298	NA
182.208	5.20478	107.274	3.50992	NA
182.498	4.53329	96.702	4.91166	NA
182.532	4.97322	81.991	2.46182	NA
182.839	3.46433	89.6028	4.75937	NA
182.987	4.02557	294.783	2.73633	NA
183.125	4.40107	99.92	4.52998	NA
183.148	5.26914	257.101	3.71287	NA
183.306	3.39763	213.231	4.86253	298.748
183.436	4.59822	123.425	2.1681	NA
183.813	3.43023	191.091	1.82217	NA
184.023	3.39142	163.83	3.06583	NA
184.297	6.44306	60.5055	2.96487	NA
184.412	4.45776	98.0229	4.22194	NA
185.832	5.79694	74.7157	2.84705	NA
186.086	5.76334	48.6069	2.74735	NA
186.683	4.48902	74.0362	5.421	NA
186.814	4.90897	86.1607	3.00623	NA
186.818	5.32665	71.4982	2.50556	NA
187.212	5.75988	78.2678	3.03306	NA
188.777	4.70384	137.099	3.39291	NA
189.787	5.3832	68.6117	4.925	NA
189.94	4.64178	273.254	1.7034	69.1307
192.106	5.12928	261.34	6.44902	53.0393
194.135	2.58285	135.422	3.36545	NA
194.903	2.803	134.653	2.63037	310.179
198.675	4.14639	192.446	1.94628	NA
207.564	3.13354	204.611	2.88327	NA
212.007	16.5985	53.7629	3.49637	NA
213.387	5.6659	226.523	2.47986	NA
220.837	3.81566	91.1448	1.90647	NA
221.925	5.08243	63.3244	3.63238	NA
238.053	8.09404	72.0197	3.31164	NA
241.098	5.73692	36.9662	7.28814	NA
247.023	20.4268	111.964	4.94118	NA
248.965	19.7915	951.145	3.58336	NA
260.372	3.60034	470.132	1.75195	NA
284.224	4.00019	172.336	1.82317	NA
291.443	3.24391	344.87	1.54056	NA
291.731	3.10898	640.011	1.51884	95.8995
296.388	2.97573	303.524	2.44941	NA
296.943	11.173	485.902	2.20237	93.8987
300.549	3.40635	205.562	2.0798	86.4743
315.874	3.44159	78.2462	3.55437	NA
316.858	4.50798	72.4539	7.94743	NA
322.784	4.56293	83.1278	2.66466	NA
325.903	5.34935	30.1947	2.00306	NA
337.359	6.26082	105.822	4.09719	NA
340.307	4.14521	232.752	4.07853	NA
343.007	6.84617	208.982	3.00166	NA
355.625	6.87125	496.112	3.07993	NA
356.799	1.73552	345.909	2.26708	110.282
391.448	24.3591	641.29	36.1467	NA
1031.08	41.5106	177.331	2.80327	98.2087
1168.98	39.2919	150.446	2.68894	98.9294
1863.05	15.0885	54.9143	3.2506	97.943
1875.9	12.2024	84.9137	1.14315	99.0627
1907.19	12.9426	80.1429	1.95345	87.7194
1964.2	28.0297	91.3584	1.88786	87.979

## Sheet: Upper Miocene strata
AGE	± (1-s)	Uconc	U/Th	Conc
2.56461	1.32974	146.761	2.01534	0.408358		1165
5.76673	1.53557	281.715	2.71002	1.00532
5.81826	0.887466	50.5246	4.13019	0.576874
6.85118	0.80527	362.592	3.12669	-1.92027
7.0045	0.356335	546.538	2.0955	-1.17069
7.36686	0.84376	216.848	4.09637	-3.12157
7.44736	0.546726	81.3281	3.86043	NA
7.53738	1.09981	130.006	2.3326	-0.658838
7.64061	0.446799	96.4705	2.26539	NA
7.91342	0.344269	200.443	1.9962	NA
7.92472	0.304462	197.702	2.35185	NA
7.98219	0.231141	709.203	3.1686	NA
8.15317	0.350617	158.371	2.71726	NA
8.19878	0.377518	185.771	2.26751	NA
8.44671	0.403143	119.28	2.86856	NA
8.54486	0.454856	156.291	3.90946	NA
10.5179	0.487647	112.394	3.49983	NA
10.5661	0.74734	57.3083	2.90378	NA
10.8596	0.694428	132.242	2.4107	2.6527
11.404	0.464376	171.812	2.15276	NA
12.1221	0.409526	281.297	2.58811	NA
12.1395	1.11888	36.3341	2.05574	NA
15.1767	1.37333	230.841	2.27638	NA
17.4305	0.528274	249.44	1.53076	NA
23.7461	0.354783	1348.05	2.65227	NA
23.9661	0.943536	69.5804	2.48406	NA
25.4634	0.37657	1184.9	2.64344	NA
25.9105	0.875209	155.997	2.07835	NA
26.329	0.736141	160.512	1.39553	NA
31.4845	1.13382	296.695	1.99357	-8.89024
32.9611	1.43672	224.341	1.94884	-12.9968
35.447	1.07499	129.789	4.84	NA
35.5588	0.709747	225.305	3.34428	NA
35.7365	0.306483	633.883	2.10242	-15.2285
35.7941	1.12514	193.982	2.49276	NA
36.4165	0.60454	337.467	2.1636	NA
36.864	0.870395	201.535	2.3925	NA
36.9064	0.555695	507.211	3.86464	3.31579
36.9836	1.20628	170.574	2.14175	NA
37.1364	0.476519	1270.14	1.89273	NA
37.4358	1.38804	80.3389	2.97288	NA
37.8952	1.71917	218.219	2.85366	-15.4319
39.3671	0.392472	1502.09	3.4668	-3745.07
39.3869	1.09029	357.849	2.38989	NA
39.4555	0.668695	441.477	2.65605	-14.1885
40.3628	0.736838	234.291	3.6349	NA
40.7808	0.755744	391.77	3.37972	NA
41.4134	0.99648	117.897	5.84048	NA
41.6725	0.679557	355.814	2.69066	NA
42.3135	0.795615	304.094	3.49653	NA
45.3772	0.956705	160.106	2.90272	NA
45.9584	1.23457	548.138	3.535	NA
47.9118	2.22821	104.626	4.68033	NA
48.0119	0.435286	436.149	5.2619	300.024
48.0958	1.53184	74.0154	2.14475	NA
51.0936	0.679153	327.53	3.17884	NA
51.1831	1.4697	397.968	2.75504	NA
51.3233	1.12819	368.724	5.71714	NA
51.4071	0.899561	419.664	4.66767	NA
51.5807	1.05319	467.518	7.58236	-95.0754
51.9198	0.996489	251.58	5.92848	NA
51.9783	0.760633	380.547	3.9789	NA
52.0467	3.67569	805.932	4.69641	NA
52.351	0.831333	905.362	9.00012	NA
52.3519	1.20102	439.084	3.30069	NA
52.5398	1.26158	761.441	8.50128	NA
52.8171	1.38341	195.906	2.17893	-5.68289
52.8476	0.708108	409.645	6.66794	NA
52.9732	0.316537	980.261	4.91191	27.8172
52.9878	0.648645	284.322	5.00587	NA
53.1116	1.2191	268.188	6.91927	NA
53.2234	1.20739	220.518	5.27269	NA
53.3723	1.18013	157.245	2.07948	NA
53.5235	0.738037	380.651	2.99574	NA
53.5368	0.690498	896.677	3.21577	NA
53.6321	1.14072	314.682	1.94898	NA
53.6965	1.31877	379.521	2.60422	NA
53.7969	1.02974	557.895	4.5814	NA
53.912	1.28312	121.14	2.56779	-6.05018
54.0776	1.15715	313.495	2.40206	NA
54.1988	0.76172	381.169	3.11699	NA
54.2024	0.920414	176.151	4.4844	NA
54.3051	1.12019	235.86	2.67021	NA
54.3628	0.351873	431.336	2.12456	262.931
54.493	1.55529	182.111	2.60968	NA
54.611	1.47408	331.582	6.69988	NA
54.6452	0.549583	1826.88	1.89966	118.298
54.6723	1.28477	217.387	2.15799	NA
54.7247	0.727624	316.306	3.3204	NA
54.8557	1.26725	315.253	6.98708	-22.5786
54.9039	0.753875	561.279	4.59339	NA
54.909	2.27998	268.278	6.65409	-23.5105
55.0069	1.21402	310.036	4.05967	NA
55.2273	1.02284	505.178	3.52771	-38.2035
55.3511	0.964498	1612.99	5.32468	36.0775
55.3756	1.76443	713.618	2.47469	186.835
55.6774	0.674864	2161.53	2.15975	NA
55.8509	0.511609	724.78	3.88037	-49.5136
55.908	1.10648	336.363	2.11159	NA
56.0148	1.33438	448.416	3.50559	NA
56.0589	1.5704	386.782	3.73422	NA
56.2578	1.11946	421.372	8.70112	NA
56.3337	0.695495	675.215	1.49897	-73.9517
56.4085	3.15114	254.266	3.06927	NA
56.633	1.12522	582.344	7.60639	NA
56.736	1.22199	336.65	2.34005	NA
56.8065	0.868456	1211.69	5.78107	NA
56.843	0.747029	1683.19	3.7923	-258.541
56.87	1.19199	255.294	7.22859	NA
56.9443	0.754024	668.193	3.37183	17.2358
57.0218	1.53335	156.15	6.32054	NA
57.0247	0.663	1541.38	7.29702	NA
57.0834	1.14086	475.589	5.75768	NA
57.1373	1.13614	272.746	3.02789	NA
57.1455	1.4925	95.1919	2.77675	NA
57.1505	0.906865	239.719	5.52733	NA
57.1733	2.37359	411.302	4.2725	14.5629
57.2612	1.44957	280.039	3.38208	NA
57.2724	1.03004	236.192	5.67666	NA
57.278	0.904055	353.303	2.49563	NA
57.2809	1.16694	190.578	5.36535	NA
57.2941	0.705038	1792.92	5.66251	NA
57.3815	0.837628	545.85	3.60228	NA
57.3945	1.2015	148.017	3.99429	NA
57.4061	0.801294	907.349	6.33097	NA
57.4585	0.903811	3219.73	3.98828	76.7455
57.4678	1.22276	465.192	6.00754	NA
57.5464	1.25559	237.075	4.36131	NA
57.592	0.674269	2134.54	3.53998	NA
57.6285	1.13257	435.363	2.53874	NA
57.7304	1.20693	1044.18	4.48735	32.9375
57.9791	1.15362	312.338	4.63256	NA
57.9803	0.939101	586.921	5.15125	NA
58.2175	0.96607	204.499	2.40542	NA
58.2235	1.13297	177.077	4.29531	NA
58.2596	1.56947	124.989	3.69371	NA
58.2954	1.05453	379.028	5.10548	NA
58.3182	0.965338	418.977	2.89174	NA
58.3276	1.32532	458.238	3.76157	NA
58.331	0.464544	1182.82	2.75999	-77.1572
58.5062	0.753365	635.685	4.47584	NA
58.5615	1.04322	944.047	58.8111	NA
58.6835	1.7861	299.347	6.41382	NA
58.722	0.641166	838.595	4.04049	NA
58.8173	0.549206	1177.82	5.19694	NA
58.8726	0.726697	272.063	2.51561	-24.4533
58.9602	2.67046	69.7882	2.31729	-11.2749
58.9804	1.21533	1095.99	3.96847	69.4977
58.9971	3.01274	6539.59	5.49203	9.10116
59.0147	0.803213	383.986	4.35866	NA
59.1568	0.89115	982.399	4.0698	NA
59.162	1.88104	104.071	6.32785	NA
59.2636	1.63763	274.884	2.83005	NA
59.3413	1.46915	177.448	5.00196	NA
59.4277	0.396336	612.938	4.60036	-79.8765
59.4334	0.856143	198.353	7.19606	NA
59.4908	1.55417	134.722	2.65936	NA
59.4986	1.12864	674.764	2.91021	NA
59.5098	0.93104	398.863	6.35017	NA
59.6632	0.767164	825.908	2.76288	NA
59.7212	0.991883	815.916	8.42162	NA
59.9481	0.782854	4619.99	4.14352	NA
59.9643	0.804021	1499.58	3.87311	NA
60.1877	1.65345	190.102	4.498	85.4309
60.2723	1.18783	507.229	4.88822	-11.189
60.3461	0.852916	560.922	4.59046	-50.557
60.3536	1.13775	335.369	2.87801	NA
60.4452	1.2001	613.12	4.36873	NA
60.5133	1.25427	319.032	4.51375	NA
60.5767	0.301465	1184.13	3.95825	40.4708
60.6191	0.829633	659.194	3.68367	NA
60.6677	0.903617	1911.9	4.12617	NA
60.7104	1.57944	131.274	3.46471	NA
60.748	0.809812	284.263	5.78614	NA
60.7589	0.858724	378.547	4.25281	-318.467
60.7769	1.03745	544.847	1.91199	NA
60.8195	1.36546	177.502	3.45072	NA
61.1288	1.36533	198.211	3.14858	NA
61.1473	1.15014	1020.17	1.93937	NA
61.1792	1.20863	314.803	4.43994	NA
61.2591	1.06642	839.306	3.71976	NA
61.319	0.787558	586.487	5.65994	NA
61.489	1.1704	301.173	3.2553	NA
61.5003	1.29149	321.732	3.54128	-187.21
61.593	1.6001	1028.67	2.98122	NA
61.6445	3.48472	205.86	1.79935	51.5987
61.6639	1.02545	273.271	4.99754	NA
61.9487	1.10299	516.853	3.94105	NA
62.107	2.10768	184.512	1.37596	-371.784
62.4695	1.12365	218.987	2.90563	NA
62.6242	1.56794	707.708	4.4781	NA
62.652	0.779356	348.172	5.10064	-37.3744
62.6667	1.40941	966.851	2.80583	13.5929
62.6738	3.32058	209.375	14.3982	NA
62.9431	1.48981	836.978	5.89125	NA
63.0016	1.92612	109.677	3.64831	NA
63.0854	1.40992	124.009	6.79767	NA
63.1559	0.848442	1126.61	1.47333	-96.1199
63.2567	0.371389	1783.2	2.34823	57.4013
63.3084	1.44198	558.548	3.62089	NA
63.3262	1.46758	265.726	4.52074	NA
63.3374	1.21727	219.82	3.863	NA
63.5648	1.20236	338.082	2.36456	NA
63.5898	0.335369	1299.57	3.0159	2449.73
63.6122	0.814448	613.769	4.42494	NA
63.7578	1.15807	290.657	2.39394	NA
63.8042	1.64978	275.454	2.23375	NA
63.8251	0.609697	1010.63	5.44579	111.104
63.8402	2.53465	109.63	1.86514	22.6431
63.868	0.675598	1778.71	3.7122	NA
63.884	3.33735	138.234	3.03423	-20.8597
63.9043	0.914056	770.607	4.55041	NA
63.9652	1.62107	412.397	1.89457	NA
64.426	1.73847	138.622	4.65387	NA
64.6792	1.16788	552.946	4.25481	NA
64.6984	1.54767	136.585	3.22163	NA
64.8435	2.4517	104.574	1.99843	-4.14692
64.9215	0.989289	397.233	4.92915	NA
64.9337	1.30064	344.804	2.23294	NA
64.9963	1.08578	302.874	2.77362	NA
65.0602	1.30772	285.16	3.06377	NA
65.1105	0.932872	1116.6	2.98445	231.606
65.1541	1.16926	353.67	2.47793	NA
65.2703	0.324705	452.796	3.10425	28.2985
65.2808	1.2172	317.462	3.5781	NA
65.4897	0.851672	249.838	2.24098	NA
65.5012	0.876562	246.167	3.17355	NA
65.5217	2.1643	267.237	2.47099	-20.4025
65.6046	0.907279	1117.72	1.39275	44.8895
65.6879	1.32669	292.108	3.3277	19.0623
65.6943	1.07328	875.702	2.012	NA
65.7386	1.56493	100	8.98341	NA
65.8206	1.02382	784.756	1.90599	NA
65.8857	1.48291	205.065	2.20644	NA
65.9937	1.15912	685.663	3.0059	NA
66.0604	1.23254	674.831	4.71975	NA
66.1254	1.02756	180.517	4.42712	NA
66.1378	0.868556	1053.03	4.7805	49.3438
66.1452	1.23483	286.092	2.03892	NA
66.2041	0.62572	517.379	2.49609	91.6808
66.2152	2.37813	472.817	2.13918	-30.978
66.2195	0.769476	548.976	4.85771	NA
66.2215	4.84895	94.441	3.02439	18.5708
66.4209	0.825748	780.237	4.26943	NA
66.4744	1.52773	410.985	4.08434	NA
66.4812	1.27856	487.725	3.51114	NA
66.5911	2.42825	144.569	3.20373	NA
66.6251	1.19377	626.433	2.48917	NA
66.6483	0.962746	1007.29	2.83081	NA
66.6581	0.941668	513.076	5.25682	-150.396
66.7618	1.36406	314.713	8.34494	NA
66.7911	0.995449	1387.84	3.99835	NA
66.8182	1.20281	316.756	4.01804	NA
66.8602	4.69594	116.531	3.53457	47.0916
66.9185	3.66814	98.7275	3.00095	22.2275
67.0268	0.965775	721.977	4.08381	NA
67.1462	2.35128	1033.69	5.80449	101.618
67.2129	2.38035	165.752	1.83919	53.9624
67.2309	1.79911	387.373	3.53255	30.6372
67.2686	0.776259	860.993	3.87161	57.9854
67.2804	1.2754	501.614	3.43431	NA
67.2998	1.30696	581.7	1.79943	NA
67.3052	1.13161	566.282	7.85919	NA
67.3083	0.919231	919.431	3.36908	NA
67.4495	1.04152	805.78	12.2085	NA
67.5198	1.19868	161.489	4.34142	NA
67.5218	0.698562	725.542	3.72717	34.9701
67.6137	1.37541	406.416	2.81712	NA
67.6196	0.896493	359.302	3.34047	NA
67.7784	0.949705	455.646	2.44846	NA
67.8206	1.6033	337.768	2.56453	NA
67.826	1.07406	231.628	3.75571	NA
67.9614	1.18211	1003.77	2.5145	NA
67.9796	4.85398	179.041	2.63543	NA
67.9798	1.04782	509.694	2.21009	NA
67.9977	1.12002	739.18	3.8046	NA
68.1054	0.681617	854.705	3.23747	NA
68.1721	1.17562	234.124	7.27302	NA
68.2542	1.62533	58.6612	3.70853	NA
68.2889	1.50069	800.658	16.5122	NA
68.3287	0.475775	696.052	2.23706	75.548
68.3346	1.64032	103.374	2.91497	NA
68.346	1.54851	297.003	34.6037	NA
68.3549	2.23162	83.4677	1.83731	NA
68.4007	2.25519	74.6129	6.70887	NA
68.4449	1.95398	1260.07	2.75141	76.7537
68.4581	0.340479	1467.82	3.21854	55.3012
68.4821	1.75757	146.304	2.67273	NA
68.5821	0.992564	421.548	4.64166	NA
68.6859	1.34829	504.382	4.28218	NA
68.6987	1.01539	371.708	3.18617	NA
68.7149	1.61201	241.159	2.58649	NA
68.7388	1.04612	271.737	2.66037	317.664
68.7588	0.824265	1168.38	3.37741	NA
68.7764	0.951297	302.213	1.82806	NA
68.8166	0.794027	127.687	2.61535	-11.2284
68.9507	2.35241	283.301	2.06907	-56.242
69.011	1.57192	144.646	1.8478	-21.6477
69.1681	1.27155	116.621	4.47385	NA
69.2898	2.19851	113.345	2.29834	-14.8211
69.2989	1.76946	129.099	1.95565	NA
69.3064	0.820328	199.397	3.32214	-18.648
69.3449	0.800089	600.723	6.22205	29.648
69.418	2.6829	214.424	3.43231	NA
69.4197	1.95309	106.263	5.61453	NA
69.4308	1.40482	148.38	3.14506	NA
69.466	1.8796	170.597	2.61627	NA
69.5224	1.77021	130.073	3.06747	234.392
69.547	2.22046	139.269	3.30952	-40.9097
69.5877	1.5227	600.132	16.6702	736.285
69.6288	2.27383	305.316	5.10233	NA
69.6317	1.7245	899.694	1.87255	131.844
69.6375	2.81207	154.204	2.29192	12.6611
69.8494	2.02419	121.495	2.12276	NA
69.9898	1.39412	230.803	2.33147	NA
70.0438	0.787211	213.763	2.83827	-13.4253
70.0515	1.77633	68.9532	4.54321	NA
70.0748	1.31694	407.598	5.62327	NA
70.0795	1.62909	181.541	3.31548	NA
70.1328	1.48135	261.289	6.67831	NA
70.2556	1.82187	180.438	4.07207	NA
70.2843	2.15308	161.539	2.9262	NA
70.2965	1.17791	65.4161	3.12369	NA
70.4089	1.6919	148.229	4.43847	NA
70.4634	1.2106	622.308	1.79036	NA
70.4825	1.7987	702.874	7.41051	NA
70.5004	1.48681	430.659	4.52495	NA
70.5228	5.96809	204.594	4.94628	NA
70.5699	2.47051	203.209	2.00127	-15.0806
70.6325	0.803704	925.396	3.59074	NA
70.724	1.21321	278.959	4.31649	NA
70.7969	0.794375	772.415	7.36901	NA
70.8065	1.55436	83.9611	3.0932	NA
70.8218	1.32997	459.357	3.70415	NA
70.8347	1.25653	226.524	4.80127	NA
70.8424	2.45182	122.875	1.95884	-18.6747
70.9403	0.972804	374.67	6.19451	NA
71.0417	2.11495	111.527	1.91	NA
71.0881	2.06674	104.186	3.18186	NA
71.1273	1.68876	523.023	2.54665	NA
71.205	1.34124	195.738	2.62724	NA
71.2752	2.12201	221.612	4.85961	NA
71.3485	1.60359	310.902	2.62083	8.4181
71.3503	1.34511	286.608	2.9913	NA
71.44	0.674933	510.153	2.00124	-139.356
71.4443	1.2497	326.241	3.36546	NA
71.5228	1.46734	319.853	3.15794	NA
71.569	1.78457	82.0728	2.07159	NA
71.5746	1.80994	178.02	2.78987	NA
71.5749	1.80806	164.094	5.77547	NA
71.5956	2.205	150.139	3.35986	NA
71.6602	1.41453	131.351	2.39832	NA
71.695	1.84562	251.456	3.79281	NA
71.7562	1.11754	366.483	3.13589	NA
71.7619	1.42165	194.201	2.24133	NA
71.7736	1.17493	147.885	2.75424	NA
71.7981	2.52829	24.9212	2.0281	NA
71.848	2.70667	48.6626	1.50781	NA
71.8901	1.26235	290.812	3.13345	NA
71.922	3.26694	303.401	1.2742	NA
71.9481	1.16013	197.96	2.91884	NA
71.9551	1.69135	113.431	4.0526	NA
71.9589	2.53318	207.174	5.02855	-13.819
71.9749	2.6002	197.559	4.0497	NA
72.0167	0.780613	162.781	3.56911	-14.5839
72.0614	5.34585	213.88	2.41477	-30.3091
72.0718	1.56369	294.028	7.3021	NA
72.1604	1.26294	185.317	1.98983	92.1402
72.168	2.11057	78.3013	1.71405	NA
72.2389	1.08241	211.494	2.9689	NA
72.2544	1.26315	193.447	1.87759	NA
72.2715	1.16426	161.572	2.86463	64.1109
72.2782	1.13044	947.596	2.7481	NA
72.2815	3.16981	113.9	4.28117	-10.8629
72.342	1.18753	329.188	3.5559	NA
72.3585	1.02502	448.214	34.6686	NA
72.3729	1.5689	319.346	2.52181	NA
72.4185	1.55698	147.62	2.59696	NA
72.4193	1.50358	569.875	3.17806	NA
72.4297	1.6732	129.424	2.90777	NA
72.4543	1.78681	572.323	2.64665	-617.965
72.4586	2.48794	261.384	2.09859	NA
72.4621	1.29714	1039.44	5.79042	NA
72.4915	1.13174	249.827	2.84702	-69.6073
72.5081	0.915694	161.678	3.03503	-53.9046
72.5842	1.44726	200.585	2.22342	NA
72.6035	1.83432	294.702	3.63478	NA
72.6242	1.2194	265.411	3.11757	NA
72.6381	1.39443	445.337	5.99771	NA
72.701	1.14127	209.637	2.84044	NA
72.7181	1.28771	305.836	7.14681	NA
72.761	1.20745	380.26	3.4131	NA
72.7646	0.709084	466.274	10.5324	-48.733
72.7865	2.0789	64.7243	2.60586	NA
72.7985	2.34581	55.5365	1.80361	NA
72.8015	1.53491	446.587	2.75235	NA
72.8389	1.813	872.947	2.35869	NA
72.8513	2.43402	245.657	2.74621	-38.7636
72.8617	1.12661	183.605	2.90923	NA
72.8622	0.871298	497.938	6.85118	NA
72.8658	1.2477	215.085	2.20659	NA
72.8662	1.03142	170.045	2.99373	NA
72.883	1.38187	353.697	3.22502	NA
72.8876	1.01447	487.989	5.6766	NA
72.9129	2.15085	118.732	3.88753	NA
72.9193	1.94323	181.932	3.05906	-26.5151
72.9285	1.1588	136.211	1.943	NA
72.9438	1.75526	952.928	5.30591	NA
72.9451	1.90724	252.435	1.91295	NA
72.9527	0.551317	2735.02	1.90632	9.31105
73.0018	0.949446	602.841	4.56467	NA
73.0146	1.46373	215.604	4.51317	NA
73.0832	1.53156	161.029	2.98133	NA
73.1302	2.37818	194.731	1.72238	NA
73.2258	1.33471	200.963	2.37329	NA
73.2332	1.60014	425.42	3.21742	NA
73.2434	2.37099	84.6455	2.01933	NA
73.2681	1.28814	342.956	5.67505	NA
73.2753	1.40764	129.065	2.4177	NA
73.2934	1.13107	116.964	2.76467	NA
73.3062	1.77785	312.303	1.87949	NA
73.3287	1.63763	227.133	3.34254	NA
73.3365	1.43351	299.305	2.4723	NA
73.3535	1.71144	123.636	4.16603	NA
73.3893	1.67838	190.654	3.38207	-99.4252
73.4446	2.46683	41.6433	2.0052	NA
73.4497	2.51233	163.076	2.4842	33.7771
73.4678	1.55883	355.173	3.30147	NA
73.4755	1.75353	177.123	6.69477	NA
73.4855	0.995141	439.375	4.85135	NA
73.5048	1.20421	489.059	5.28846	NA
73.5204	1.94919	111.403	2.69196	NA
73.5379	1.45186	465.223	3.7138	NA
73.5871	1.57849	101.812	2.07809	NA
73.5874	2.39351	177.264	2.27521	NA
73.6074	1.76321	342.458	3.39303	NA
73.6127	1.14776	151.13	2.42404	NA
73.6231	1.41158	488.741	3.29902	NA
73.6437	2.00636	80.669	1.67072	-17.3105
73.6537	1.25521	387.806	2.48778	NA
73.7269	1.53592	305.483	5.53902	NA
73.7293	1.54634	228.205	4.49525	NA
73.7573	1.30666	207.944	3.85527	NA
73.7691	1.53618	114.589	3.20749	NA
73.7828	1.54141	212.776	2.40397	NA
73.7828	1.61882	141.76	3.09356	NA
73.7977	0.982268	429.993	4.11259	NA
73.8239	1.10633	157.678	2.59455	NA
73.9345	1.28145	214.34	2.32186	NA
73.9362	1.3091	114.291	3.05176	NA
73.9688	1.5224	270.978	3.88194	198.145
73.9879	1.96104	185.419	2.88716	NA
74.0105	1.67337	84.7372	4.815	NA
74.044	1.49215	378.952	2.87406	NA
74.0853	2.07055	78.7281	4.79439	NA
74.1258	1.24494	108.99	4.45057	NA
74.1447	0.493923	249.19	3.0741	236.802
74.149	0.611911	1063.93	4.94324	47.2069
74.1899	1.52965	260.027	3.20328	NA
74.2865	2.07574	125.56	3.1952	NA
74.2886	1.55021	139.798	4.17094	NA
74.3965	1.74639	107.455	4.17374	NA
74.4078	1.54863	286.096	3.98586	NA
74.4113	1.91571	189.872	3.77023	NA
74.4563	1.67717	95.1014	1.18564	NA
74.5099	1.14731	408.359	4.60687	NA
74.5123	0.674158	366.401	2.3698	90.0113
74.573	1.18198	290.957	2.83815	NA
74.59	1.5273	297.782	5.50514	NA
74.6423	1.07061	279.729	4.03906	NA
74.6753	1.1092	197.267	2.28989	NA
74.7415	1.60448	609.603	1.73369	NA
74.8001	2.07752	236.016	4.17385	NA
74.8956	6.19373	258.35	6.06853	NA
74.9034	1.74859	156.781	2.39739	NA
74.9106	1.87566	174.948	2.23704	NA
74.9169	1.67766	375.103	2.08201	NA
74.9993	1.36164	291.225	2.05181	NA
75.037	1.5741	290.784	3.34015	-158.434
75.0415	2.47993	39.8634	2.91613	NA
75.0682	2.91641	63.9914	2.74336	NA
75.1171	2.74826	147.276	1.9218	9.31728
75.1548	1.88809	164.936	3.39686	NA
75.246	1.97073	151.195	2.28481	NA
75.3108	2.67062	272.558	1.86003	NA
75.325	1.2916	272.591	4.40509	NA
75.3825	0.547087	466.529	4.40021	36.8215
75.5069	1.71965	203.999	1.96214	NA
75.5462	2.06747	91.0573	1.88994	NA
75.6854	1.12563	497.888	2.18942	NA
75.7001	1.30383	112.408	2.75306	NA
75.7012	1.79896	583.418	2.27663	NA
75.7033	1.79755	158.748	3.03527	NA
75.7077	2.41389	63.5026	2.85322	NA
75.7633	2.43399	75.4881	2.08189	NA
75.8264	1.41336	225.03	3.49034	NA
75.8473	2.10477	287.443	4.05501	NA
75.9007	1.46097	111.197	2.97638	NA
75.9144	1.61513	450.22	1.40564	NA
75.9709	1.43941	184.878	1.66062	NA
75.9743	1.23939	104.659	2.81852	NA
75.981	0.821351	531.107	3.34619	NA
75.9945	2.19755	90.8379	2.26184	NA
76.0032	3.63092	147.802	2.31503	NA
76.0531	1.78746	134.561	2.49473	NA
76.1253	6.61422	45.7798	3.08517	11.2516
76.244	1.59259	291.112	2.06554	NA
76.3465	1.0483	309.762	2.81963	NA
76.3882	1.44955	116.012	1.41085	NA
76.4024	2.10883	225.985	2.23291	NA
76.414	1.4417	149.156	2.64685	NA
76.4281	6.61536	71.7343	2.50553	NA
76.5401	1.75019	247.371	4.11195	NA
76.7124	0.937761	364.845	5.9768	NA
76.7188	1.23241	177.988	2.06596	NA
76.8899	1.49721	651.094	9.9838	NA
76.8968	2.06989	252.187	2.91684	NA
77.0359	2.13769	70.4798	2.54296	NA
77.0575	1.68051	199.695	2.27087	NA
77.105	1.84256	249.942	2.51655	NA
77.1523	1.8277	73.0802	3.70855	NA
77.1705	2.15301	41.2068	2.16599	NA
77.268	1.6057	243.282	2.47097	NA
77.294	1.48565	204.803	4.87085	NA
77.3635	1.13741	321.269	4.81907	NA
77.3736	1.06173	324.636	4.62999	NA
77.419	1.89092	176.197	5.09851	NA
77.4269	2.30052	131.712	1.60396	NA
77.4314	1.75704	251.336	2.24164	NA
77.5113	1.60894	441.973	16.7547	NA
77.5954	1.80366	287.67	3.54105	NA
77.6708	1.88536	77.6346	2.82905	NA
77.6897	1.84808	80.1057	1.61008	NA
77.6931	1.11207	160.617	2.26327	-44.246
77.76	1.04976	487.975	3.97805	NA
77.7715	1.99328	202.145	3.21238	NA
78.0293	1.62513	108.613	2.54045	NA
78.0679	1.92106	113.001	2.28688	NA
78.0695	2.07826	385.934	2.90914	NA
78.1181	1.44526	164.163	1.68866	NA
78.2793	1.13883	232.726	1.7708	NA
78.3078	1.25626	129.021	4.52383	NA
78.3147	1.71533	179.895	4.5109	NA
78.4164	5.27874	368.722	5.48915	NA
78.4403	1.42128	240.882	2.66077	NA
78.4505	1.80731	192.739	2.25101	NA
78.4992	1.97563	624.684	3.38645	NA
78.5279	1.82057	75.6579	2.68935	NA
78.543	1.67038	150.604	4.15287	NA
78.5942	1.82948	468.01	2.85471	NA
78.7005	2.22929	49.6314	3.7732	NA
78.8629	6.20005	113.738	2.15192	-7.11276
79.0133	1.78453	654.877	4.31151	NA
79.097	2.836	48.4708	2.84061	NA
79.1072	2.95279	1301.73	4.40056	NA
79.1422	2.38304	70.0458	2.47602	NA
79.2263	2.72362	67.9095	1.66423	NA
79.2955	2.04456	442.97	5.37472	NA
79.4159	1.61832	169.611	2.10211	NA
79.4367	1.41095	286.585	2.45046	NA
79.621	5.90287	64.4572	4.68632	NA
79.7441	2.19104	54.8133	2.20927	NA
79.7903	2.11014	137.91	3.37516	NA
79.7909	1.94305	155.6	4.82252	NA
79.8211	2.5708	133.892	1.69	NA
79.8447	2.10093	96.9448	2.39675	NA
80.438	1.44672	376.526	3.82953	NA
80.5755	3.54728	160.86	1.5825	-84.9718
80.5988	2.40829	76.7037	3.0451	NA
80.6768	1.35629	390.796	12.787	NA
80.7084	1.56621	429.845	4.67637	NA
80.8436	2.36989	52.168	1.48943	NA
80.8844	1.45684	512.246	4.96239	NA
80.9184	1.5304	174.411	3.7436	NA
80.9546	1.15744	97.5152	1.60728	NA
80.96	2.30209	64.4067	2.51028	NA
80.9676	5.32215	1044.12	3.91231	NA
80.9704	1.4237	118.809	2.12959	NA
80.9742	1.51364	120.123	2.68405	NA
80.9919	2.24753	154.043	4.8208	NA
81.0181	2.02251	347.747	4.34494	NA
81.0211	2.41332	397.589	4.90537	NA
81.1797	1.71211	134.828	1.79846	NA
81.3083	1.5873	77.9283	1.61408	NA
81.3261	1.91372	131.556	2.43691	NA
81.3696	2.03352	181.585	1.62386	NA
81.4322	1.46727	298.956	1.86678	NA
81.4582	1.90291	253.11	1.93742	NA
81.4734	1.95607	114.112	2.20795	NA
81.5252	1.37563	189.034	1.46645	NA
81.7492	1.9432	137.573	3.70724	NA
81.7864	1.26992	649.956	0.940876	NA
81.8531	2.65455	154.153	1.75595	NA
81.9313	1.38779	378.053	6.24013	NA
81.9315	1.38873	159.106	2.01452	NA
82.0661	2.88758	96.0112	2.93045	NA
82.3477	1.28464	100.331	1.7328	14.6194
82.3693	2.51689	104.148	3.25128	NA
82.4158	2.06287	232.863	2.28117	NA
82.4546	2.72789	82.3535	3.54694	NA
82.9875	1.98949	88.3699	1.99397	NA
83.0325	2.22296	136.243	1.65274	NA
83.1316	3.30575	60.582	3.03264	NA
83.1569	1.45324	632.168	2.54909	NA
83.1604	2.67352	116.004	0.81557	NA
83.2378	1.57135	222.623	2.54517	-30.8316
83.2429	3.20906	224.263	1.32733	-436.108
83.4244	1.74427	167.616	2.0372	NA
83.4299	1.94211	103.368	1.72615	NA
83.5192	1.36262	551.379	2.41204	NA
83.6886	1.95877	200.783	2.25505	NA
83.976	2.40376	119.065	1.81004	NA
84.0082	1.90805	75.158	2.82552	NA
84.0621	1.12609	452.639	3.83348	NA
84.1056	1.2701	134.791	2.45593	-12.9596
84.1855	1.91629	146.175	2.28993	NA
84.3669	1.94383	101.466	1.55104	NA
85.1482	1.9012	83.334	1.76529	NA
85.2652	2.05323	81.7257	1.83739	NA
85.437	1.78171	200.173	1.49283	NA
85.6543	1.49121	246.441	2.85796	NA
85.7945	2.34466	96.964	3.88896	NA
85.8321	2.05228	88.6608	2.1046	NA
85.9394	2.39784	107.038	2.40921	NA
86.065	2.41913	128.989	1.69783	NA
86.2167	4.10708	137.336	2.45365	NA
86.2621	1.77991	111.277	1.98824	NA
86.2661	1.97942	72.6771	3.29731	NA
86.329	2.77709	88.7159	2.3411	NA
86.552	2.36762	108.706	1.5351	NA
86.6698	1.60134	283.457	2.19039	NA
86.7214	1.57188	209.57	2.03335	NA
86.7608	1.87987	203.072	1.46646	NA
86.7803	2.49486	118.56	2.20012	NA
86.8994	3.223	181.739	4.2879	NA
87.1703	1.82806	719.441	3.58256	NA
87.1854	2.41322	93.5523	3.78263	NA
87.2787	2.41992	109.937	2.15379	NA
87.2998	1.56266	310.254	3.00878	NA
87.479	2.28267	128.193	1.83379	NA
87.6545	2.73947	76.031	2.98556	NA
87.9598	2.14764	246.262	3.08679	NA
87.9819	2.13935	58.116	3.32317	NA
88.016	2.65895	177.315	1.87536	NA
88.0346	2.10085	112.936	2.16715	NA
88.072	2.0139	80.8387	1.92562	NA
88.1029	2.65763	120.349	3.48747	NA
88.1269	2.34255	51.5575	3.51662	NA
88.1564	2.03875	142.078	1.99795	NA
88.2798	2.37977	78.2715	2.96313	NA
88.3757	2.02777	445.314	3.32665	NA
88.5203	2.08213	155.809	2.02213	NA
88.5378	3.25174	75.723	2.27625	NA
88.5993	2.63962	239.449	1.22041	NA
88.6393	2.10679	131.506	2.02006	NA
88.668	7.40974	181.654	3.13656	NA
88.7342	2.6669	56.6375	2.41734	NA
88.8264	3.17851	140.183	3.63079	NA
88.9045	2.43226	102.073	1.75082	NA
88.9138	1.95518	101.34	2.31366	NA
88.9351	2.32225	168.722	2.78601	NA
88.9725	2.42277	154.574	2.20918	NA
88.9881	3.39902	170.534	5.6458	NA
89.1077	1.70251	67.1095	2.74467	NA
89.5307	2.25535	166.099	1.81369	NA
89.5852	2.07195	184.237	7.80055	NA
89.6074	2.07477	106.766	1.79308	NA
89.6596	1.43468	693.653	3.13129	NA
89.6653	5.67298	412.218	6.38663	NA
89.7781	4.45676	240.723	2.07927	NA
89.9135	1.91676	131.875	1.59448	NA
90.069	2.45251	177.181	2.03863	NA
90.0926	1.1899	122.685	1.79348	23.2418
90.1657	3.44128	670.298	6.58693	NA
90.343	2.25793	66.6421	2.39427	NA
90.4333	1.48323	173.782	2.43034	NA
90.4812	2.41855	89.9764	1.72998	NA
90.5496	2.07951	262.133	2.28162	NA
90.6102	2.65438	92.5134	2.16664	NA
90.7836	2.3225	439.982	7.36803	NA
90.9773	3.18887	33.2418	5.26758	NA
91.0538	2.75733	81.8136	2.40534	NA
91.1602	1.82033	52.9195	2.43411	NA
91.1797	2.79762	241.424	4.00006	77.1327
91.265	1.97214	69.3131	2.33049	NA
91.5638	1.73458	76.7187	2.09118	NA
91.5953	2.46211	152.515	1.84545	NA
91.68	1.02928	8413.67	6.60237	NA
91.8959	2.10485	145.157	2.18378	NA
91.9625	2.51628	204.097	2.79372	NA
91.9989	2.24772	93.0534	1.76176	NA
92.0847	3.37715	27.1263	2.72966	NA
92.1207	2.50178	507.273	3.73696	NA
92.1305	3.7991	42.2999	2.64557	NA
92.1605	2.99558	234.599	2.52617	NA
92.227	1.91614	118.881	2.3346	NA
92.4519	2.57756	46.8884	2.95571	NA
92.5513	2.21962	126.149	3.05582	NA
92.5563	2.44879	83.2689	2.05772	NA
92.6925	1.49299	389.31	3.18257	NA
92.8626	1.1248	824.749	1.76848	177.716
93.0052	0.990367	1591.95	1.74478	NA
93.0185	2.09192	64.4079	3.55217	NA
93.07	3.56188	821.155	5.11834	NA
93.0788	2.08847	341.932	2.8958	-74.864
93.2706	2.24546	423.955	2.10905	NA
93.3579	4.7383	125.606	2.75983	NA
93.5453	0.612941	1054.27	2.31697	117.805
93.715	2.15989	157.455	4.21152	NA
93.8908	1.93319	328.832	3.523	NA
93.988	2.36659	100.362	1.93652	NA
94.0722	1.73583	342.625	1.25109	NA
94.0995	6.05559	201.44	2.2953	NA
94.2442	2.64285	95.7754	2.32968	NA
94.3925	2.16004	189.238	1.68827	NA
94.4279	5.6552	109.134	1.99099	NA
94.4418	2.00967	94.457	2.02294	NA
94.5787	2.29781	50.0451	2.61063	NA
94.6102	2.50706	155.659	2.26879	NA
94.8462	3.18221	82.0753	5.6663	NA
94.8565	4.20587	91.61	1.77351	NA
95.0108	1.38617	490.21	3.23081	NA
95.1676	2.6456	99.0933	3.41133	NA
95.1994	1.40311	346.083	2.92718	NA
95.2823	1.74976	569.32	3.7067	83.1354
95.5391	1.42704	553.431	3.54474	NA
95.6709	3.66469	312.207	4.3042	NA
95.7291	0.722166	234.552	2.71734	-72.2038
96.0061	1.8559	415.987	1.73988	NA
96.0903	1.23547	287.505	4.23189	NA
96.1383	2.30842	138.852	4.5991	NA
96.14	1.19608	1633.31	3.94461	NA
96.2827	2.40365	62.3563	2.0963	NA
96.288	1.41089	210.456	4.83012	NA
96.6323	1.47034	595.742	3.70907	NA
96.69	1.238	563.101	6.72288	NA
96.6948	2.98481	92.6798	2.52261	NA
96.8074	1.22769	337.275	3.40768	NA
96.9003	3.53806	264.99	2.42955	NA
96.941	1.24118	1988.85	3.56288	123.203
97.0112	1.27794	372.979	6.20986	NA
97.0614	1.14339	903.002	4.53075	NA
97.1863	0.962875	1313.16	3.49026	NA
97.1952	1.76533	1146.84	3.17146	170.755
97.3188	4.9565	261.391	2.47581	NA
97.3337	2.31542	84.3984	2.54691	NA
97.3928	1.74005	242.752	2.83844	NA
97.3953	1.48512	962.63	4.74125	NA
97.4331	1.21843	369.574	5.0352	84.9915
97.4454	0.696331	673.162	4.11361	64.2961
97.5493	1.35427	450.114	1.56812	NA
97.5535	1.18857	250.542	6.09485	NA
97.5621	2.69032	57.6934	2.78934	NA
97.6152	1.52744	694.511	2.01344	NA
97.7335	1.26095	1031.44	3.31554	96.6793
97.8215	2.01946	176.568	8.09643	NA
97.8919	0.61206	473.478	3.22404	98.858
97.956	1.20663	284.101	5.76556	NA
98.0156	0.991985	352.443	3.09724	NA
98.0162	1.99861	277.465	5.73786	NA
98.0619	1.17757	1200.61	2.49118	79.295
98.0689	2.83274	94.4931	3.27735	NA
98.1938	3.06512	41.046	2.43466	NA
98.3726	1.63423	1374.68	3.74838	NA
98.631	2.3662	88.582	1.75096	NA
98.8349	1.63166	745.899	2.93093	NA
98.8716	1.53195	491.176	3.46495	NA
98.8889	2.18181	394.885	2.49507	NA
99.1236	1.47828	384.689	2.64066	NA
99.1407	3.01379	87.0189	4.07134	NA
99.22	5.38863	157.138	3.21734	NA
99.419	2.51354	108.136	3.45346	NA
99.4707	1.75601	403.027	3.80023	NA
99.4986	2.48874	231.599	3.48099	NA
99.5885	1.42109	273.768	6.7716	NA
99.7052	8.69382	103.065	2.02872	NA
99.9623	2.21117	398.13	3.68725	NA
99.9937	1.60977	853.683	5.41858	NA
100.054	1.84051	106.667	2.11912	NA
100.233	3.60477	112.98	3.59811	NA
100.408	1.29519	182.14	1.01705	42.3738
100.48	0.658027	285.031	3.70526	81.7125
100.975	2.16363	184.964	3.08552	NA
101.017	1.27343	423.439	2.16149	NA
101.225	0.964172	542.073	3.23441	97.3724
101.248	4.20506	53.8412	4.28326	NA
101.371	3.51717	44.1951	3.21792	NA
101.383	1.60342	298.76	2.58781	NA
101.418	1.11693	468.004	2.36437	-2028.65
101.677	2.30681	214.611	3.8958	NA
101.693	1.07218	269.522	5.93936	NA
101.88	5.35721	337.647	3.35724	-63.358
102.207	1.6769	991.115	4.0223	NA
102.456	2.51447	279.724	2.12877	NA
102.477	2.75008	49.9247	4.72509	NA
102.723	2.06946	250.908	4.56963	NA
103.403	2.93152	71.8238	3.42286	NA
103.512	1.16895	466.206	3.51515	NA
103.794	2.49711	92.9246	2.89465	NA
103.822	2.32353	897.188	10.3389	NA
104.05	2.84014	90.6343	2.15207	NA
104.443	2.95753	93.9434	2.18629	NA
104.764	0.820946	1169.16	2.79663	83.763
105.312	2.48378	210.959	3.73869	NA
105.833	2.89412	131.546	1.39938	NA
105.864	2.88749	269.042	2.37989	48.3588
106.22	2.57872	344.656	2.33466	NA
106.292	2.49381	527.263	3.83943	NA
106.494	2.60902	139.871	1.92388	NA
106.523	5.32153	112.138	3.5631	NA
106.906	1.2778	926.008	2.71598	NA
106.936	1.33354	310.474	4.03371	NA
107.248	1.68188	413.62	2.84537	NA
107.307	2.10557	550.342	2.09129	NA
107.343	3.7768	354.688	1.92037	NA
107.981	2.17166	324.956	2.90088	NA
107.99	2.94797	152.654	3.73972	NA
108.449	2.15766	412.376	1.71184	NA
109	3.20057	190.123	3.07945	NA
109.15	1.95213	219.369	1.51244	NA
109.166	2.61048	438.983	0.721755	NA
109.375	1.48504	783.521	1.05802	NA
109.569	2.73658	113.125	1.78354	NA
109.917	1.33444	562.455	0.70915	NA
110.144	3.17916	133.431	2.6497	NA
110.514	4.31471	248.308	4.39908	NA
111.418	1.88113	367.998	1.3515	NA
111.44	7.32265	201.685	1.80728	NA
111.872	2.47943	406.992	2.68573	NA
112.532	2.11989	259.442	1.91086	NA
112.857	2.49144	257.016	3.17207	NA
112.9	3.73577	97.1414	2.5225	NA
113.087	5.06835	199.017	1.98943	NA
113.442	5.30013	103.423	2.3946	NA
113.501	1.60497	351.325	2.58519	NA
113.573	1.78611	232.713	2.15908	NA
113.605	2.75889	86.1954	1.22963	NA
113.616	7.49226	369.294	2.78031	NA
113.735	0.755344	388.698	1.98542	141.152
113.807	3.81543	130.073	2.44613	NA
114.142	8.2244	364.422	2.88553	NA
114.273	1.88288	191.414	1.518	NA
114.463	2.21691	193.134	0.736967	NA
114.688	2.85224	146.325	4.14276	NA
114.862	2.44923	99.4794	4.75847	NA
115.172	2.10681	92.4621	1.9403	NA
115.221	2.17824	103.681	4.64253	NA
115.513	1.41813	327.26	1.57306	NA
115.535	11.0308	338.993	17.6208	NA
115.657	3.37549	81.2755	3.79659	NA
115.742	2.44914	85.9131	2.05386	NA
116.094	1.32314	167.53	1.74762	69.0545
116.218	2.56134	295.749	1.67056	NA
116.753	3.04274	316.441	1.83582	NA
118.087	1.91856	814.809	2.32769	NA
118.659	3.33703	108.787	3.84553	NA
119.377	3.30897	61.427	4.9021	NA
121.203	2.32088	154.987	1.91674	NA
121.258	2.73376	428.818	2.35957	NA
122.307	3.22891	180.928	2.06239	NA
122.658	2.35503	109.774	2.4006	NA
123.012	2.17909	477.002	1.38809	NA
123.522	3.57434	181.651	1.45252	NA
123.59	2.58257	272.753	7.00835	NA
123.755	2.10438	329.313	4.62649	NA
124.101	2.46503	65.7485	5.84116	NA
125.07	7.74927	493.323	2.50194	NA
125.245	9.58928	287.821	2.92701	NA
126.663	7.71191	257.027	2.71211	NA
127.527	4.05339	85.5678	1.97324	27.6504
127.761	1.64888	1138.31	6.22637	NA
128.979	3.01365	137.15	2.29057	133.178
129.682	5.02571	132.84	2.64458	NA
132.201	11.1284	201.763	1.68427	NA
132.656	3.08556	108.641	2.85162	-50.3085
134.175	3.77118	76.3359	1.42504	40.4315
134.41	3.28686	74.9383	2.47669	NA
135.208	4.62948	75.3734	2.79554	-177.645
135.783	3.09875	82.6815	2.68224	NA
135.789	3.93701	100.914	2.6934	-29.2269
137.087	4.12346	73.6111	2.35832	-30.8549
137.935	3.61645	150.259	2.1619	-34.3713
138.84	6.44199	95.9791	3.09123	57.9107
140.876	2.63962	160.007	3.00645	NA
141.016	12.8879	231.48	2.42674	NA
141.246	1.55078	78.7625	1.93764	-48.0655
141.923	9.56859	171.083	2.19138	NA
142.058	1.64389	145.107	1.66996	36.2378
142.565	1.1844	98.0125	2.51295	-357.458
142.657	3.18863	119.174	1.8793	72.6345
143.07	2.81016	91.7045	3.54143	NA
143.367	1.94244	336.51	1.84548	300.019
143.683	4.13491	118.117	2.58022	-159.468
144.108	3.14945	96.44	1.54011	90.6575
144.136	2.96476	154.176	2.57394	99.4847
144.307	2.88261	184.489	2.96179	38.1348
144.564	3.53222	146.299	2.17244	NA
144.943	2.12123	95.491	2.83278	-207.792
145.114	2.50869	66.6517	1.88116	NA
145.496	3.12204	222.064	2.25807	NA
145.65	4.39135	85.211	2.19029	NA
146.045	1.74728	100.764	2.97952	27.6824
146.283	1.85133	116.273	2.34597	14367.5
146.521	6.11177	47.7494	3.53603	NA
146.58	3.53638	253.825	2.79306	NA
147.057	2.14058	89.2997	1.47943	NA
147.741	2.72006	145.362	1.13902	NA
147.927	5.92874	41.141	3.03409	NA
148.034	3.07237	149.011	2.2204	NA
148.251	0.762109	166.079	3.73307	56.0287
148.334	3.31408	95.735	1.6613	-162.788
148.644	3.07847	285.873	3.81082	NA
148.841	2.94447	72.0895	3.30372	NA
148.861	2.68968	103.005	2.88102	NA
148.886	2.14883	105.414	3.67075	58.8484
148.904	3.59536	186.265	3.53539	NA
148.987	2.64402	86.5164	3.60564	NA
149.113	2.33547	114.445	1.83381	NA
149.304	2.19945	112.45	1.72454	NA
149.324	5.1838	47.9409	3.60655	NA
149.46	3.13221	47.9381	2.97783	NA
149.524	4.59771	39.066	8.55119	NA
149.53	3.6976	92.9695	2.33771	NA
149.598	1.9389	151.106	6.97478	NA
149.652	3.00397	66.9594	1.75394	NA
149.778	3.21394	73.2641	3.21987	NA
149.84	2.39327	80.5819	2.89414	NA
149.844	4.22393	83.7677	15.8538	NA
149.864	3.9277	56.788	4.33597	NA
149.982	5.05594	35.6362	4.78293	NA
150.228	3.16273	201.757	4.05987	NA
150.322	1.78093	971.459	3.64662	NA
150.349	2.2984	95.4714	2.13459	NA
150.432	2.68337	149.677	2.92206	NA
150.515	2.04625	189.549	2.69961	NA
150.532	2.29519	94.7874	1.79237	NA
150.548	2.66359	158.162	2.66839	219.222
150.675	2.52951	118.798	2.78536	NA
150.768	3.17459	62.2086	2.11484	NA
151.078	2.20552	128.999	2.61302	NA
151.165	4.12312	89.4611	1.88014	NA
151.418	2.57673	124.433	2.9628	NA
151.467	3.39528	90.7552	7.9126	NA
151.514	1.84531	187.424	1.79642	NA
151.577	3.39855	122.39	3.49028	NA
151.583	2.3385	93.531	2.58114	NA
151.599	2.40276	114.103	3.21284	NA
151.921	3.65742	89.1989	2.67748	NA
152.049	3.92138	85.4799	3.4808	NA
152.11	4.3746	111.759	4.97507	-5916.31
152.337	2.1997	149.281	1.6401	NA
152.646	3.73602	66.6108	3.39508	NA
152.753	1.84497	225.549	3.88804	NA
152.97	2.36461	112.107	3.00728	NA
153.048	3.46449	90.695	2.16238	NA
153.113	3.90828	89.5568	1.58346	NA
153.129	2.16394	94.5828	1.83326	159.343
153.166	2.75817	61.7745	3.07005	NA
153.811	3.8526	83.0815	3.45457	NA
153.822	3.79555	50.3114	3.86766	NA
153.837	4.07216	97.2877	3.0797	NA
154.089	8.35162	23.9075	4.91673	NA
154.252	3.70427	84.0143	2.41146	NA
154.285	1.58551	139.251	3.12042	87.2196
154.314	2.56155	179.562	1.88423	NA
154.385	4.98093	53.1655	3.6686	NA
154.428	2.7922	63.5815	3.59721	NA
154.511	3.52534	96.3766	3.05622	NA
154.588	3.04279	62.0895	2.55356	NA
154.798	4.52743	143.182	1.52594	-182.839
155.022	1.47046	80.8637	2.02764	-390.267
155.05	1.87051	132.967	2.95033	NA
155.096	2.78176	65.2704	2.40532	NA
155.394	5.72367	36.2235	2.38059	NA
155.474	2.52951	91.0581	2.7171	NA
155.622	4.82309	48.348	4.43226	NA
155.663	3.0564	53.5094	3.27127	NA
155.688	3.43515	126.914	1.91809	NA
155.847	2.63414	74.3879	2.69903	NA
156.079	2.71732	50.8262	3.30155	NA
156.233	4.12382	38.4647	2.77579	NA
156.512	2.08258	291.751	6.33217	NA
156.686	1.87305	372.597	4.04057	104.755
156.694	4.48716	25.1373	5.26936	NA
156.787	2.72029	74.3889	3.41912	NA
156.883	2.7565	307.298	3.28345	NA
157.021	3.67496	70.689	2.39386	NA
157.132	3.9727	54.7659	3.78676	NA
157.456	3.52722	129.379	2.24194	NA
157.816	4.55991	73.1616	2.8249	NA
157.841	5.59345	46.1878	2.70158	NA
157.865	2.23317	147.073	2.08169	NA
158.008	4.36203	67.818	2.77808	NA
158.127	4.70156	47.8899	3.08103	NA
158.388	4.14194	67.4672	4.5099	NA
158.478	2.9517	59.5928	2.5836	NA
158.907	4.02563	92.1512	4.67802	NA
159.047	4.7505	83.5762	3.38243	NA
159.171	3.3999	86.1809	3.13041	NA
159.606	2.77695	194.56	8.63701	NA
160.112	5.62814	28.554	3.73105	NA
160.363	4.02237	91.3503	2.59497	NA
160.382	4.26649	45.4518	2.32092	NA
160.43	4.14138	56.0095	2.90468	NA
160.465	3.39109	230.644	4.24373	NA
160.717	3.50794	63.2947	1.74557	14.1057
160.862	4.30554	150.539	3.49947	NA
161.023	3.97804	132.575	3.93898	NA
161.05	4.0505	82.6755	3.15073	NA
161.376	4.97983	69.6044	2.62071	NA
161.425	4.45502	151.169	4.86003	NA
161.587	4.40401	42.9584	2.92967	NA
161.91	4.48073	65.7056	3.46914	NA
162.037	3.51439	191.468	5.7156	NA
162.609	3.65254	77.0086	4.39933	NA
163.154	2.8508	62.1056	1.94084	NA
163.346	3.50847	271.369	6.30991	NA
163.438	2.71307	42.3217	2.71542	NA
163.797	3.43385	405.183	9.34005	NA
165.013	4.20029	105.629	2.42049	NA
165.516	4.87943	51.6764	2.86315	NA
165.523	3.90539	53.68	2.4889	NA
165.627	4.42993	103.746	3.16984	NA
165.669	3.08158	144.737	2.30459	NA
165.717	6.09478	302.497	4.35519	NA
165.775	3.41644	152.011	2.20478	NA
165.842	3.62567	151.213	2.37797	NA
165.986	3.29774	71.3287	3.1116	NA
166.032	4.16293	117.431	2.5858	NA
166.052	4.90096	43.9507	3.4884	NA
166.269	4.99797	64.1331	1.58095	NA
166.684	3.91826	66.3917	3.00185	NA
166.723	3.1993	153.329	5.21612	NA
167.033	4.23424	178.533	3.19572	NA
167.096	4.02572	78.5432	2.41439	NA
167.196	2.75087	599.9	1.80481	NA
167.576	3.21583	126.9	2.41343	NA
167.637	4.06797	199.071	2.18824	NA
167.73	3.33596	36.5451	2.70022	NA
168.083	3.1778	268.437	5.22272	NA
168.401	4.9028	105.97	4.392	NA
168.76	4.24172	83.2269	5.84679	NA
168.788	4.32528	60.4115	3.03897	NA
168.826	5.39297	32.757	1.86926	NA
169.322	1.84846	703.329	3.99776	NA
169.871	3.22345	201.329	2.6089	NA
170.213	3.8835	243.018	4.07177	NA
170.354	5.13276	108.558	2.08436	NA
170.431	2.912	103.25	1.75658	NA
170.628	2.82964	119.389	4.00417	NA
170.729	4.75454	125.698	3.34358	NA
170.812	3.6354	100.213	3.39208	NA
171.521	3.0532	249.837	3.75782	NA
171.65	3.48702	143.679	3.25148	NA
171.735	1.71163	227.069	4.02267	117.524
171.814	3.4329	330.42	1.72451	NA
171.941	5.55161	115.94	3.85049	NA
172.415	2.19467	634.954	4.48515	59.77
173.392	4.00124	148.207	2.42293	NA
173.703	4.90396	56.5283	2.40066	NA
173.932	7.01538	72.2649	5.01937	NA
175.045	3.23208	168.769	2.83953	NA
175.42	4.87254	191.513	2.45449	NA
175.477	4.84121	101.343	1.83845	NA
175.618	4.32216	100.947	2.7312	NA
175.923	3.33031	238	3.73267	NA
175.991	5.55775	91.8041	3.86435	NA
176.185	4.93294	53.2307	2.38738	NA
176.548	3.84316	68.2271	3.09459	NA
176.597	4.43403	89.0346	4.5036	NA
176.998	4.30567	129.145	2.33101	NA
177.109	13.5249	216.422	2.08195	NA
177.123	4.38306	153.489	2.19203	NA
177.292	3.84166	129.246	2.5713	NA
177.767	3.08595	458.953	2.3464	85.7736
178.08	4.71865	144.562	1.77289	NA
178.106	5.53806	85.3088	3.29368	NA
178.164	3.9654	304.958	2.49371	NA
179.761	4.31459	187.056	2.47797	NA
180.119	7.29213	75.9434	2.70222	NA
180.546	3.01868	275.525	2.79223	NA
180.988	3.72573	182.653	1.90554	NA
181.008	3.74574	288.979	3.67653	NA
181.651	3.9457	260.065	1.78115	NA
181.732	11.0816	27.8386	2.60351	NA
181.769	3.54968	251.357	2.33386	NA
181.841	3.39436	291.498	1.57653	NA
182.346	8.41651	63.8251	4.31091	NA
182.731	4.11377	179.033	1.86589	NA
183.341	4.04791	187.815	2.57004	NA
184.429	10.7763	85.0603	2.75044	NA
185.113	3.4539	287.281	2.85003	NA
186.083	6.87698	180.684	2.41014	NA
186.125	6.22317	327.588	2.59978	NA
186.469	2.79193	211.825	16.8337	NA
186.928	7.58473	178.841	3.19051	NA
187.827	3.94376	147.871	2.19187	NA
188.77	2.79645	627.512	7.5618	NA
188.816	4.46319	299.925	2.71285	NA
189.293	8.78739	93.0424	3.76245	NA
189.665	9.22576	63.9664	4.19285	NA
189.745	4.10216	314.169	2.18067	NA
189.92	3.50359	292.886	2.52838	NA
190.135	8.31683	88.6636	1.87241	NA
190.278	4.0547	90.1915	2.01961	NA
190.692	2.80651	385.713	2.52423	NA
190.714	7.7629	210.249	2.7783	NA
190.928	3.91702	194.794	2.86999	NA
191.833	5.54624	90.5417	2.84508	NA
192.082	3.11735	68.4146	2.83646	NA
193.834	3.44254	113.426	2.96148	NA
193.854	5.44883	177.752	2.7602	NA
193.895	2.98116	386.28	2.66282	NA
193.93	3.97278	100.646	3.49639	NA
194.376	4.32098	115.09	2.48654	NA
195.87	3.89606	931.188	51.4226	NA
196.425	3.53453	282.497	3.76936	NA
196.426	2.06691	293.991	4.09945	NA
196.788	8.58676	200.469	6.29168	NA
197.246	5.11973	425.639	3.6872	NA
197.717	5.3352	221.069	2.33513	168.208
197.839	5.84957	96.1946	3.71412	NA
198.311	3.06232	73.4325	3.70727	NA
198.365	4.26062	123.333	3.09005	NA
198.422	3.64431	205.124	1.53126	NA
198.579	4.09112	101.044	2.04662	NA
199.093	3.87651	182.836	2.00322	NA
199.596	5.9614	116.713	4.55923	NA
200.666	4.6431	79.941	2.50445	NA
200.734	4.62859	98.591	2.59267	NA
202.354	4.25488	68.8863	3.74873	NA
203.726	4.34372	181.016	2.0529	NA
203.896	5.80037	298.769	2.86877	143.445
203.936	5.17306	146.016	3.42674	NA
204.047	5.60375	390.433	2.92902	96.4373
204.315	6.0422	64.9825	3.10487	NA
204.991	4.43406	93.7003	2.36563	NA
205.096	4.00936	156.125	4.14464	NA
206.008	3.46258	217.148	1.47071	NA
206.829	12.5536	158.297	6.65792	NA
208.255	5.62292	127.746	3.45351	NA
209.161	4.49511	118.172	3.85155	NA
210.913	4.4984	196.645	4.13043	NA
212.119	3.2791	119.644	3.25643	NA
212.378	5.94196	129.179	2.57885	NA
212.513	4.47764	150.477	2.58233	NA
212.661	5.48856	94.6033	3.27557	NA
213.47	4.42465	50.627	2.46292	NA
213.685	8.89834	525.281	3.1576	NA
215.886	4.73471	137.779	4.55973	NA
216.781	11.55	163.617	3.73026	NA
217.582	5.92107	155.925	4.75766	NA
217.755	5.13458	89.0869	1.53327	NA
218.508	6.215	67.018	2.38588	NA
219.014	6.65894	67.4433	3.16907	NA
219.639	4.85516	91.993	3.09562	NA
224.808	14.7454	47.3963	4.3509	NA
228.978	11.0377	411.001	2.2855	NA
230.127	4.64014	83.6303	2.28228	NA
230.869	7.01002	84.1355	1.15896	NA
232.518	6.61357	96.4957	4.09159	NA
241.608	6.21975	55.7616	3.8141	NA
243.508	8.92207	201.045	3.51737	NA
243.666	6.68876	228.72	1.34232	NA
250.764	3.07405	544.111	0.72791	NA
258.464	11.1442	29.7419	3.95435	NA
259.111	4.86818	161.969	1.0369	NA
264.662	20.6924	706.964	2.01888	86.2021
281.779	3.08794	635.633	2.33421	82.9471
286.37	15.8786	256.941	3.58197	NA
286.515	18.5544	59.0685	3.40578	NA
291.65	6.1299	311.978	2.37288	NA
295.952	3.68246	750.165	2.28185	NA
297.642	1.45439	515.969	2.20199	31.9901
299.666	3.05047	316.38	2.18795	NA
299.737	3.31702	660.674	1.94901	NA
306.208	4.61909	293.76	1.61773	NA
324.922	9.16205	48.1103	2.05901	NA
326.113	6.20103	181.75	1.65701	98.6704
340.595	5.10741	119.202	4.23295	NA
340.716	9.39688	112.571	1.24834	NA
341.763	4.94606	104.457	4.10878	NA
342.494	7.02963	97.0744	2.51904	NA
343.057	7.44555	132.549	2.17196	NA
343.11	7.67352	190.19	1.87619	NA
343.681	19.5162	137.841	2.27254	NA
344.257	5.16148	298.751	1.93755	NA
346.663	6.55035	103.906	3.44854	NA
348.637	5.87123	180.5	0.735251	97.9849
349.316	5.83571	304.965	2.94634	NA
351.085	10.1502	118.616	2.84373	NA
351.993	5.34384	478.824	2.19121	NA
356.139	3.4274	813.092	3.57526	NA
359.073	4.06278	214.335	3.04341	NA
360.335	8.39674	76.0136	4.02789	NA
361.7	3.68739	428.481	2.38589	NA
362.349	8.84444	437.182	8.78675	NA
363.452	17.7117	101.21	3.73443	NA
367.469	7.87336	276.96	2.16689	NA
369.734	7.72998	92.583	2.6387	NA
371.335	9.38041	200.745	2.81145	NA
381.663	5.14008	162.447	2.83957	NA
388.597	1.8856	440.682	7.31255	65.9935
388.675	8.56007	162.604	2.40972	NA
395.674	4.33667	306.811	2.02758	85.2348
396.389	5.56376	136.064	1.49623	NA
424.054	10.096	322.188	3.66023	103.145
1002.48	5.57055	390.104	13.1052	100.927
1107.78	27.0334	195.397	6.11451	96.2158
1182.97	34.3962	256.636	2.9276	97.7416
1256.15	63.2253	146.211	1.812	99.4913
1268.68	45.7034	270.149	1.94308	101.018
1272.96	15.4031	45.8701	2.85226	102.134
1377.13	38.6753	217.127	1.49513	96.4531
1458.61	20.0026	355.697	2.62471	98.3432
1468.63	16.1614	91.9092	1.93375	95.2515
1505.07	13.3558	247.929	2.39258	98.2049
1602.74	19.902	112.263	3.97379	99.9217
1704.62	15.3918	52.5705	1.4714	95.6077
1749.23	40.529	104.49	2.47453	92.1437
1758.64	11.738	99.316	1.90862	102.448
1800.58	22.7025	164.363	2.19077	90.9328
1825.89	32.8328	122.42	1.19014	86.4132
1841.08	9.92078	71.0724	0.592944	98.0065
1864.44	16.6357	149.927	1.38643	88.3343
1875.78	12.345	109.048	1.78658	96.6067
1881.39	11.4537	38.1423	0.752434	96.0154
1884.35	20.7047	19.6408	0.996453	98.613
1925.51	32.4655	30.8225	0.767383	99.6226
1927.12	122.518	772.791	7.70419	23.8346
1947.47	15.0095	56.1167	0.87323	103.484
1987.9	29.0209	144.903	1.16642	96.5563
1991.15	13.5236	177.696	2.16133	94.3802
2065.63	8.86705	76.6128	1.03194	100.293
2066.21	14.2948	115.358	1.81194	98.3817
2069.84	10.7695	114.83	1.68325	91.4929
2178.77	33.9665	582.376	24.1298	96.3582
2259.12	46.3505	88.017	1.42191	89.9939
2313.03	20.428	367.594	1.88789	99.3041
2562.92	16.3411	82.5023	0.663835	99.6548
2569.3	18.1558	34.9404	0.9834	99.7305
2590.92	10.9825	118.346	2.71238	91.629
2611.63	10.2971	110.304	3.15494	100.289
2633.71	11.3326	112.845	1.1247	99.8134
2753.01	10.3182	109.209	1.36517	99.9571
2761.46	17.2372	10.0774	0.244298	101.339
2774.78	36.7237	91.192	1.90916	81.8442
2793.27	10.3094	17.3013	1.05412	103.631

[truncated: 25 more sheets: Lower-Mid Miocene strata, Oligocene strata, Eocene strata, Upper Cretaceous, Lower Cretaceous strata, TM-1, TM-2, TM-3, TM-4, TM-5, TM-6, TM-7, TM-8, TM-9, TM-10, TM-11, TM-12, TM-13, TM-14, TM-15 …]
